# Supplementary material
Source: publisher figshare collection journal article supplement (https://tandf.figshare.com/articles/dataset/_/9599699)

# checkCIF/PLATON report

Structure factors have been supplied for datablock(s) lcsm16

THIS REPORT IS FOR GUIDANCE ONLY. IF USED AS PART OF A REVIEW PROCEDURE FOR PUBLICATION, IT SHOULD NOT REPLACE THE EXPERTISE OF AN EXPERIENCED CRYSTALLOGRAPHIC REFEREE.

No syntax errors found.      CIF dictionary      Interpreting this report

## Datablock: lcsm16

---

Bond precision:    C-C = 0.0271 Å                      Wavelength=1.54184

Cell:                      a=6.8570(9)              b=25.484(3)              c=13.743(2)  
                            alpha=90              beta=92.460(14)              gamma=90  
Temperature:              100 K

|                        | Calculated               | Reported     |
|------------------------|--------------------------|--------------|
| Volume                 | 2399.3(5)                | 2399.3(6)    |
| Space group            | P 21/c                   | P 1 21/c 1   |
| Hall group             | -P 2ybc                  | -P 2ybc      |
| Moiety formula         | C21 H9 Fe O6 [+ solvent] | C21 H9 Fe O6 |
| Sum formula            | C21 H9 Fe O6 [+ solvent] | C21 H9 Fe O6 |
| Mr                     | 413.13                   | 413.13       |
| Dx, g cm <sup>-3</sup> | 1.144                    | 1.144        |
| Z                      | 4                        | 4            |
| Mu (mm <sup>-1</sup> ) | 5.288                    | 5.288        |
| F000                   | 836.0                    | 836.0        |
| F000'                  | 834.17                   |              |
| h,k,lmax               | 6,23,12                  | 6,23,12      |
| Nref                   | 1865                     | 1853         |
| Tmin,Tmax              | 0.948,0.948              | 0.249,1.000  |
| Tmin'                  | 0.948                    |              |

Correction method= # Reported T Limits: Tmin=0.249 Tmax=1.000  
AbsCorr = MULTI-SCAN

Data completeness= 0.994                      Theta(max)= 44.312

R(reflections)= 0.1525( 1022)              wR2(reflections)= 0.4306( 1853)

S = 1.426                      Npar= 197

---

The following ALERTS were generated. Each ALERT has the format

**test-name\_ALERT\_alert-type\_alert-level.**

Click on the hyperlinks for more details of the test.

---

### Alert level A

THETM01\_ALERT\_3\_A The value of  $\sin(\theta_{\max})/\lambda$  is less than 0.550  
Calculated  $\sin(\theta_{\max})/\lambda = 0.4531$

**Author Response: Crystals diffracted to 1.1 Å of resolution, so the data had to be trimmed accordingly**

---

### Alert level B

PLAT084\_ALERT\_3\_B High  $wR_2$  Value (i.e.  $> 0.25$ ) ..... 0.43 Report

**Author Response: Due to the poor resolution of the data acquired, the model was based on ill shaped electron density map. As consequence the  $wR_2$  and  $R_1$  values are larger than normal values**

PLAT201\_ALERT\_2\_B Isotropic non-H Atoms in Main Residue(s) ..... 8 Report  
C2 C3 C4 C5 C6 C7 etc.

**Author Response: In order to maximize the data/parameter ratio, the disordered atoms were refined isotropically**

PLAT341\_ALERT\_3\_B Low Bond Precision on C-C Bonds ..... 0.02706 Å.

**Author Response: It is caused by the low resolution data.**

---

### Alert level C

PLAT018\_ALERT\_1\_C  $\text{\_diffraction\_measured\_fraction\_theta\_max}$  .NE. \*\_full ! Check  
PLAT082\_ALERT\_2\_C High  $R_1$  Value ..... 0.15 Report  
PLAT088\_ALERT\_3\_C Poor Data / Parameter Ratio ..... 9.41 Note  
PLAT241\_ALERT\_2\_C High 'MainMol' Ueq as Compared to Neighbors of C16 Check  
PLAT241\_ALERT\_2\_C High 'MainMol' Ueq as Compared to Neighbors of C22 Check  
PLAT242\_ALERT\_2\_C Low 'MainMol' Ueq as Compared to Neighbors of C8 Check  
PLAT242\_ALERT\_2\_C Low 'MainMol' Ueq as Compared to Neighbors of C21 Check  
PLAT242\_ALERT\_2\_C Low 'MainMol' Ueq as Compared to Neighbors of C27 Check  
PLAT369\_ALERT\_2\_C Long C(sp<sup>2</sup>)-C(sp<sup>2</sup>) Bond C20 - C20\_b . 1.53 Å.  
PLAT906\_ALERT\_3\_C Large K Value in the Analysis of Variance ..... 2.604 Check  
PLAT911\_ALERT\_3\_C Missing FCF Refl Between Thmin & STh/L= 0.453 13 Report  
PLAT922\_ALERT\_1\_C  $wR_2$  in the CIF and FCF Differ by ..... 0.0028 Check  
PLAT934\_ALERT\_3\_C Number of (Iobs-Icalc)/SigmaW > 10 Outliers .... 1 Check  
PLAT977\_ALERT\_2\_C Check Negative Difference Density on H6 -0.38 eÅ<sup>-3</sup>  
PLAT977\_ALERT\_2\_C Check Negative Difference Density on H16 -0.33 eÅ<sup>-3</sup>  
PLAT978\_ALERT\_2\_C Number C-C Bonds with Positive Residual Density. 0 Info

---

### Alert level G

PLAT002\_ALERT\_2\_G Number of Distance or Angle Restraints on AtSite 18 Note  
PLAT003\_ALERT\_2\_G Number of Uiso or Uij Restrained non-H Atoms ... 34 Report

|                   |                                                    |                |           |        |
|-------------------|----------------------------------------------------|----------------|-----------|--------|
| PLAT004_ALERT_5_G | Polymeric Structure Found with Maximum Dimension   |                | 2         | Info   |
| PLAT072_ALERT_2_G | SHELXL First Parameter in WGHT Unusually Large     |                | 0.20      | Report |
| PLAT176_ALERT_4_G | The CIF-Embedded .res File Contains SADI Records   |                | 1         | Report |
| PLAT178_ALERT_4_G | The CIF-Embedded .res File Contains SIMU Records   |                | 2         | Report |
| PLAT187_ALERT_4_G | The CIF-Embedded .res File Contains RIGU Records   |                | 2         | Report |
| PLAT300_ALERT_4_G | Atom Site Occupancy of C23                         | Constrained at | 0.5       | Check  |
| PLAT300_ALERT_4_G | Atom Site Occupancy of C24                         | Constrained at | 0.5       | Check  |
| PLAT300_ALERT_4_G | Atom Site Occupancy of C25                         | Constrained at | 0.5       | Check  |
| PLAT300_ALERT_4_G | Atom Site Occupancy of C26                         | Constrained at | 0.5       | Check  |
| PLAT300_ALERT_4_G | Atom Site Occupancy of H22                         | Constrained at | 0.5       | Check  |
| PLAT300_ALERT_4_G | Atom Site Occupancy of H23                         | Constrained at | 0.5       | Check  |
| PLAT300_ALERT_4_G | Atom Site Occupancy of H24                         | Constrained at | 0.5       | Check  |
| PLAT300_ALERT_4_G | Atom Site Occupancy of H25                         | Constrained at | 0.5       | Check  |
| PLAT300_ALERT_4_G | Atom Site Occupancy of H26                         | Constrained at | 0.5       | Check  |
| PLAT300_ALERT_4_G | Atom Site Occupancy of H27                         | Constrained at | 0.5       | Check  |
| PLAT301_ALERT_3_G | Main Residue Disorder .....(Resd 1 )               |                | 21%       | Note   |
| PLAT432_ALERT_2_G | Short Inter X...Y Contact C1                       | ..C14          | 2.98      | Ang.   |
|                   |                                                    | -1+x,y,z =     | 1_455     | Check  |
| PLAT432_ALERT_2_G | Short Inter X...Y Contact C2                       | ..C14          | 3.14      | Ang.   |
|                   |                                                    | -1+x,y,z =     | 1_455     | Check  |
| PLAT432_ALERT_2_G | Short Inter X...Y Contact C4                       | ..C17          | 3.12      | Ang.   |
|                   |                                                    | -1+x,y,z =     | 1_455     | Check  |
| PLAT432_ALERT_2_G | Short Inter X...Y Contact C4                       | ..C18          | 3.20      | Ang.   |
|                   |                                                    | -1+x,y,z =     | 1_455     | Check  |
| PLAT432_ALERT_2_G | Short Inter X...Y Contact C5                       | ..C10          | 2.94      | Ang.   |
|                   |                                                    | -1+x,y,z =     | 1_455     | Check  |
| PLAT432_ALERT_2_G | Short Inter X...Y Contact C5                       | ..C9           | 3.14      | Ang.   |
|                   |                                                    | -1+x,y,z =     | 1_455     | Check  |
| PLAT432_ALERT_2_G | Short Inter X...Y Contact C7                       | ..C12          | 3.10      | Ang.   |
|                   |                                                    | -1+x,y,z =     | 1_455     | Check  |
| PLAT432_ALERT_2_G | Short Inter X...Y Contact C7                       | ..C13          | 3.12      | Ang.   |
|                   |                                                    | -1+x,y,z =     | 1_455     | Check  |
| PLAT432_ALERT_2_G | Short Inter X...Y Contact C8                       | ..C13          | 3.17      | Ang.   |
|                   |                                                    | -1+x,y,z =     | 1_455     | Check  |
| PLAT432_ALERT_2_G | Short Inter X...Y Contact C9                       | ..C13          | 3.17      | Ang.   |
|                   |                                                    | -1+x,y,z =     | 1_455     | Check  |
| PLAT432_ALERT_2_G | Short Inter X...Y Contact C18                      | ..C14          | 3.16      | Ang.   |
|                   |                                                    | -1+x,y,z =     | 1_455     | Check  |
| PLAT432_ALERT_2_G | Short Inter X...Y Contact C19                      | ..C24          | 3.17      | Ang.   |
|                   |                                                    | -1+x,y,z =     | 1_455     | Check  |
| PLAT432_ALERT_2_G | Short Inter X...Y Contact C21                      | ..C25          | 3.16      | Ang.   |
|                   |                                                    | 2-x,1-y,1-z =  | 3_766     | Check  |
| PLAT432_ALERT_2_G | Short Inter X...Y Contact C23                      | ..C27          | 3.16      | Ang.   |
|                   |                                                    | 2-x,1-y,1-z =  | 3_766     | Check  |
| PLAT606_ALERT_4_G | VERY LARGE Solvent Accessible VOID(S) in Structure |                | !         | Info   |
| PLAT794_ALERT_5_G | Tentative Bond Valency for Fe1 (III)               |                | 3.58      | Info   |
| PLAT860_ALERT_3_G | Number of Least-Squares Restraints .....           |                | 289       | Note   |
| PLAT868_ALERT_4_G | ALERTS Due to the Use of _smtbx_masks Suppressed   |                | !         | Info   |
| PLAT883_ALERT_1_G | No Info/Value for _atom_sites_solution_primary     |                | Please Do | !      |
| PLAT909_ALERT_3_G | Percentage of I>2sig(I) Data at Theta(Max) Still   |                | 30%       | Note   |
| PLAT933_ALERT_2_G | Number of OMIT Records in Embedded .res File ...   |                | 4         | Note   |
| PLAT954_ALERT_1_G | Reported (CIF) and Actual (FCF) Kmax Differ by     |                | 1         | Units  |

---

1 **ALERT level A** = Most likely a serious problem - resolve or explain  
 3 **ALERT level B** = A potentially serious problem, consider carefully  
 16 **ALERT level C** = Check. Ensure it is not caused by an omission or oversight  
 40 **ALERT level G** = General information/check it is not something unexpected

4 ALERT type 1 CIF construction/syntax error, inconsistent or missing data

29 ALERT type 2 Indicator that the structure model may be wrong or deficient  
10 ALERT type 3 Indicator that the structure quality may be low  
15 ALERT type 4 Improvement, methodology, query or suggestion  
2 ALERT type 5 Informative message, check

---

It is advisable to attempt to resolve as many as possible of the alerts in all categories. Often the minor alerts point to easily fixed oversights, errors and omissions in your CIF or refinement strategy, so attention to these fine details can be worthwhile. In order to resolve some of the more serious problems it may be necessary to carry out additional measurements or structure refinements. However, the purpose of your study may justify the reported deviations and the more serious of these should normally be commented upon in the discussion or experimental section of a paper or in the "special\_details" fields of the CIF. checkCIF was carefully designed to identify outliers and unusual parameters, but every test has its limitations and alerts that are not important in a particular case may appear. Conversely, the absence of alerts does not guarantee there are no aspects of the results needing attention. It is up to the individual to critically assess their own results and, if necessary, seek expert advice.

### **Publication of your CIF in IUCr journals**

A basic structural check has been run on your CIF. These basic checks will be run on all CIFs submitted for publication in IUCr journals (*Acta Crystallographica*, *Journal of Applied Crystallography*, *Journal of Synchrotron Radiation*); however, if you intend to submit to *Acta Crystallographica Section C* or *E* or *IUCrData*, you should make sure that full publication checks are run on the final version of your CIF prior to submission.

### **Publication of your CIF in other journals**

Please refer to the *Notes for Authors* of the relevant journal for any special instructions relating to CIF submission.

---

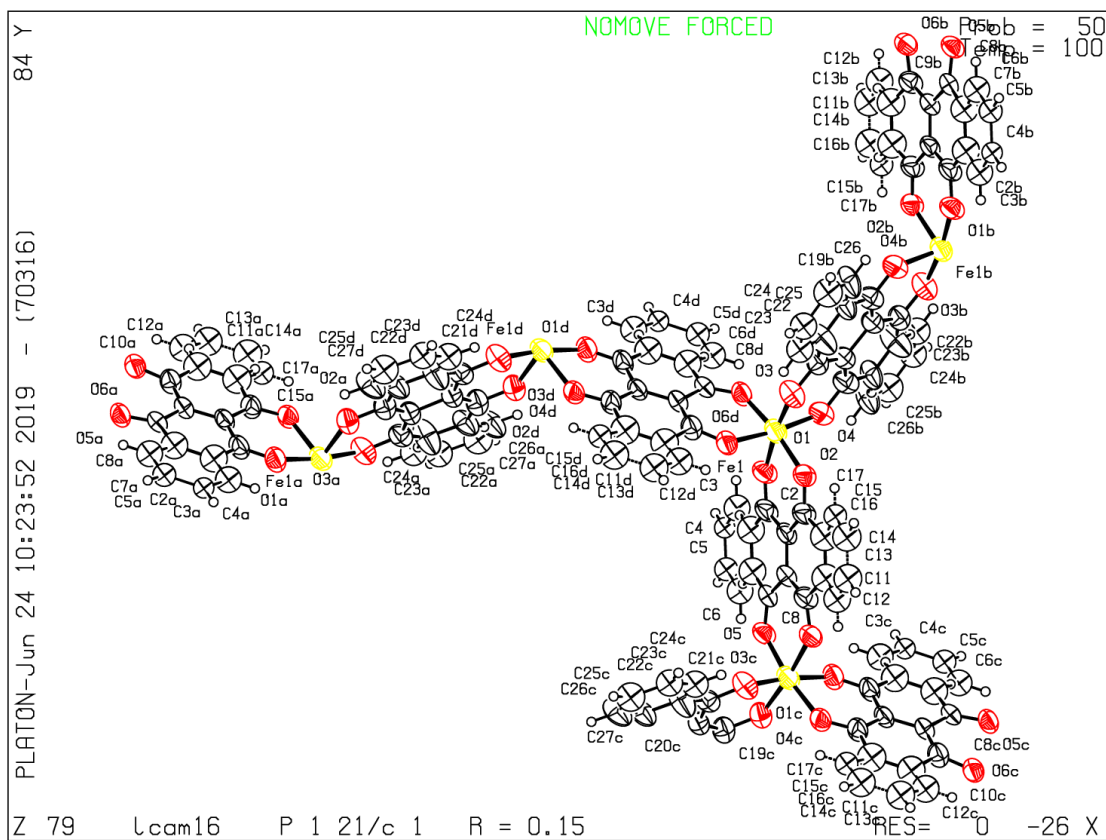

Supplement: Supplementary file 1 [file 1 › tmph_a_1653502_sm6778.pdf]
