# Supplementary material
Source: publisher figshare collection journal article supplement (https://tandf.figshare.com/articles/dataset/_/9599699)
Supplement: Supplementary file 1 [file 1]

Archive with 3 entries (3 files):
- tmph_a_1653502_sm6778.pdf
- tmph_a_1653502_sm6777.cif
- tmph_a_1653502_sm6776.docx
