# Supplementary material
Source: publisher figshare collection journal article supplement (https://tandf.figshare.com/articles/dataset/_/9599699)
Supplement: Supplementary file 1 [file 1 › tmph_a_1653502_sm6776.docx]

# Supplementary data

Novel semiconducting iron-quinizarin metal-organic framework

for application in supercapacitors

**Single Crystal X-ray diffraction of FeQ**

**Data αCollection.** X-Ray data for compound **FeQ** were collected at a temperature of 100 K using a Rigaku FR-X with Cu-Kα radiation equipped with a HypixHE6000 detector equipped with an Oxford Cryosystems nitrogen flow gas system. Data were measured using CrysAlisPro suite of programs.

**Crystal structure determinations and refinements.** X-Ray data were processed and reduced using CrysAlisPro suite of programmes. Absorption correction was performed using empirical methods (SCALE3 ABSPACK) based upon symmetry-equivalent reflections combined with measurements at different azimuthal angles. S1 The crystal structure was solved and refined against all *F*2 values using the SHELXL and Olex 2 suite of programmes. S2

All atoms in crystal structures were refined anisotropically with the exception of disordered carbon of the ligands. Hydrogen atoms were placed in the calculated idealized positions for all compounds. Disordered ligands were modelled over two positions. Atomic displacement parameters were restrained using RIGU and SIMU SHELX commands. The crystal structure present large voids filled with a lot of featureless electron density; Solvent mask protocol implemented by Olex2 show the presence of 127 electrons approximately in the voids, which could correspond with 8 molecules of water per void.

Despite of the use of an intense X-ray source, crystal of FeQ only diffracted to 1.1 Ǻ of spatial resolution. CCDC 1936111 contains the supplementary crystallographic data for this paper. These data can be obtained free of charge *via* www.ccdc.cam.ac.uk/conts/retrieving.html (or from the Cambridge Crystallographic Data Centre, 12 Union Road, Cambridge CB21EZ, UK; fax: (+44)1223-336-033; or deposit@ccdc.cam.ac.uk).

| Table S1. Crystal data and structure refinement for **FeQ**   | Identification code |  | **FeQ** | | --- | --- | --- | | Empirical formula |  | C21H9FeO6 | | Formula weight |  | 413.13 | | Temperature/K |  | 99.9(5) | | Crystal system |  | monoclinic | | Space group |  | P21/c | | a/Å |  | 6.8570(9) | | b/Å |  | 25.484(3) | | c/Å |  | 13.743(2) | | α/° |  | 90 | | β/° |  | 92.460(14) | | γ/° |  | 90 | | Volume/Å3 |  | 2399.3(6) | | Z |  | 4 | | ρcalcg/cm3 |  | 1.144 | | μ/mm‑1 |  | 5.288 | | F(000) |  | 836.0 | | Crystal size/mm3 |  | 0.01 × 0.01 × 0.01 | | Radiation |  | CuKα (λ = 1.54184) | | 2Θ range for data collection/° |  | 6.938 to 88.624 | | Index ranges |  | -6 ≤ h ≤ 6, -21 ≤ k ≤ 23, -12 ≤ l ≤ 12 | | Reflections collected |  | 5850 | | Independent reflections |  | 1853 [Rint = 0.1101, Rsigma = 0.1356] | | Data/restraints/parameters |  | 1853/289/197 | | Goodness-of-fit on F2 |  | 1.426 | | Final R indexes [I>=2σ (I)] |  | R1 = 0.1525, wR2 = 0.4041 | | Final R indexes [all data] |  | R1 = 0.2071, wR2 = 0.4306 | | Largest diff. peak/hole / e Å-3 |  | 0.78/-0.53 |  | 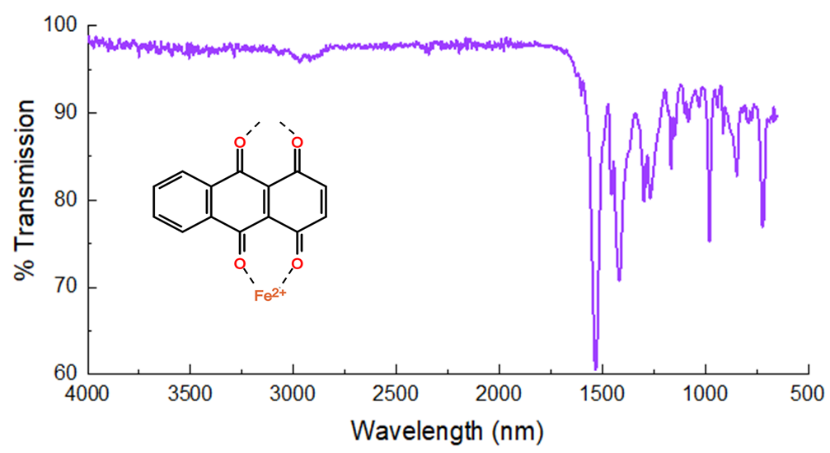 | | --- | | Figure S2: IR transmission spectrum for FeQ. The carbonyl stretching peak of quinizarin at 1638 cm-1 is not observed for FeQ indicating that quinizarin has complexed with iron. |  | | **Quinizarin** | | **Lithiated Quinizarin** | | | --- | --- | --- | --- | | *Wavenumber (cm-1)* | *Assignment* | *Wavenumber (cm-1)* | *Assignment* | | 3450 | O-H stretching | 3441 | O-H stretching | | 1638 | C=O stretching | 1523 | C=O stretching (shifted to lower frequency due to lithiation) | | 1586 | C-C stretching | 1436 | C-C stretching | | 780 | C=C bending | 866 | C=C bending | | | --- | --- | --- | --- | --- | --- | --- | --- | --- | --- | --- | --- | --- | --- | --- | --- | --- | --- | --- | --- | --- | --- | --- | --- | --- | | Table S3: FT-IR spectral peaks of quinizarin and *lithiated* quinizarin, taken from *Shetty et al*36. The FeQ spectrum matches the *lithiated* quinizarin complex suggesting that the ligand is bound to iron metal centre in a similar fashion. | | |
| --- | --- | --- | --- | --- | --- | --- | --- | --- | --- | --- | --- | --- | --- | --- | --- | --- | --- | --- | --- | --- | --- | --- | --- | --- | --- | --- | --- | --- | --- | --- | --- | --- | --- | --- | --- | --- | --- | --- | --- | --- | --- | --- | --- | --- | --- | --- | --- | --- | --- | --- | --- | --- | --- | --- | --- | --- | --- | --- | --- | --- | --- | --- | --- | --- | --- | --- | --- | --- | --- | --- | --- | --- | --- | --- | --- | --- | --- | --- | --- | --- | --- | --- | --- | --- | --- | --- | --- | --- | --- | --- | --- | --- | --- | --- | --- | --- | --- | --- | --- | --- | --- | --- | --- | --- | --- | --- | --- | --- | --- | --- | --- | --- | --- |
| 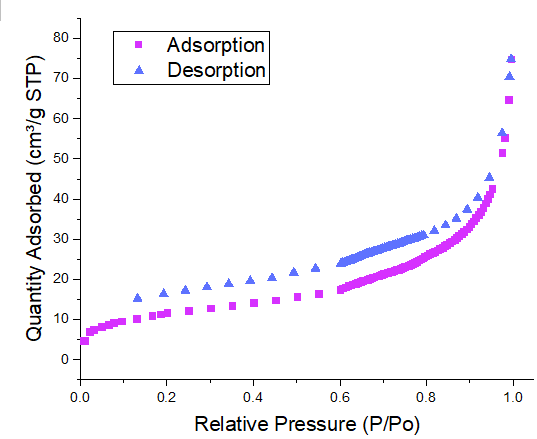 | 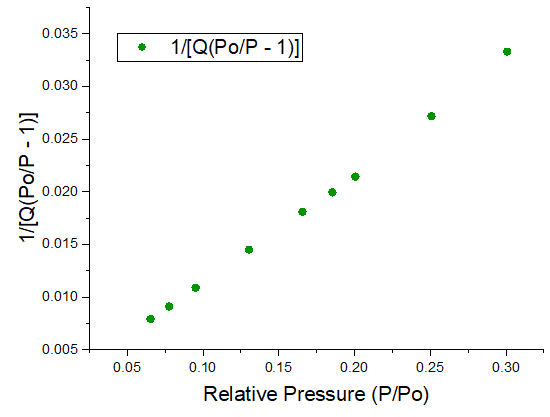 |
| Figure S4: BET surface area plot of activated FeQ, for the uptake of N2­. The specific surface area is calculated to be 40 m2g-1. | |

**References**

S1. (a) G. M. Sheldrick, *SADABS*, empirical absorption correction program based upon the method of Blessing. (b) L. Krause, R. Herbst-Irmer, G. M. Sheldrick, D. Stalke, An empirical correction for absorption anisotropy *J. Appl. Cryst.* **2015**, *48*. (c) R. H. Blessing, An empirical correction for absorption anisotropy, *Acta Crystallogr.* **1995**, *A51*, 33-38.

**S2. a) Sheldrick. G. M. Crystal structure refinement with SHELXL,** ***Acta Crystallogr.*, 2015, *C71*, 3-8; b)** O. V. Dolomanov, L. J. Bourhis, R. J. Gildea, J. A. K. Howard, H. Puschmann, OLEX2: a complete structure solution, refinement and analysis program. J. Appl. Cryst., **2009,** *42*, 339–341
