# Supplementary material
Source: publisher figshare collection journal article supplement (https://tandf.figshare.com/articles/dataset/_/9599699)
Supplement: Supplementary file 1 [file 1 › tmph_a_1653502_sm6777.cif]

data_lcam16
# end Validation Reply Form
_audit_creation_date               2019-06-24
_audit_creation_method
;
Olex2 1.2
(compiled 2018.05.29 svn.r3508 for OlexSys, GUI svn.r5506)
;
_shelxl_version_number             2014/6
_audit_contact_author_address      ?
_audit_contact_author_email        ?
_audit_contact_author_name         ''
_audit_contact_author_phone        ?
_publ_contact_author_id_orcid      ?
_publ_section_references
;
Dolomanov, O.V., Bourhis, L.J., Gildea, R.J, Howard, J.A.K. & Puschmann, H.
 (2009), J. Appl. Cryst. 42, 339-341.

Sheldrick, G.M. (2015). Acta Cryst. A71, 3-8.

Sheldrick, G.M. (2015). Acta Cryst. C71, 3-8.
;
_chemical_name_common              ?
_chemical_name_systematic          ?
_chemical_formula_moiety           'C21 H9 Fe O6'
_chemical_formula_sum              'C21 H9 Fe O6'
_chemical_formula_weight           413.13
_chemical_melting_point            ?
loop_
  _atom_type_symbol
  _atom_type_description
  _atom_type_scat_dispersion_real
  _atom_type_scat_dispersion_imag
  _atom_type_scat_source
 'C' 'C' 0.0181 0.0091 'International Tables Vol C Tables 4.2.6.8 and 6.1.1.4'
 'H' 'H' 0.0000 0.0000 'International Tables Vol C Tables 4.2.6.8 and 6.1.1.4'
 'Fe' 'Fe' -1.1336 3.1974
 'International Tables Vol C Tables 4.2.6.8 and 6.1.1.4'
 'O' 'O' 0.0492 0.0322 'International Tables Vol C Tables 4.2.6.8 and 6.1.1.4'

_shelx_space_group_comment
;
The symmetry employed for this shelxl refinement is uniquely defined
by the following loop, which should always be used as a source of
symmetry information in preference to the above space-group names.
They are only intended as comments.
;
_space_group_crystal_system        'monoclinic'
_space_group_IT_number             14
_space_group_name_H-M_alt          'P 1 21/c 1'
_space_group_name_Hall             '-P 2ybc'
loop_
  _space_group_symop_operation_xyz
 'x, y, z'
 '-x, y+1/2, -z+1/2'
 '-x, -y, -z'
 'x, -y-1/2, z-1/2'

_cell_length_a                     6.8570(9)
_cell_length_b                     25.484(3)
_cell_length_c                     13.743(2)
_cell_angle_alpha                  90
_cell_angle_beta                   92.460(14)
_cell_angle_gamma                  90
_cell_volume                       2399.3(6)
_cell_formula_units_Z              4
_cell_measurement_reflns_used      703
_cell_measurement_temperature      99.9(5)
_cell_measurement_theta_max        42.4430
_cell_measurement_theta_min        6.1130
_shelx_estimated_absorpt_T_max     0.949
_shelx_estimated_absorpt_T_min     0.949
_exptl_absorpt_coefficient_mu      5.288
_exptl_absorpt_correction_T_max    1.00000
_exptl_absorpt_correction_T_min    0.24894
_exptl_absorpt_correction_type     multi-scan
_exptl_absorpt_process_details
;
CrysAlisPro 1.171.40.14d (Rigaku Oxford Diffraction, 2018)
Empirical absorption correction using spherical harmonics,
 implemented in SCALE3 ABSPACK scaling algorithm.
;
_exptl_absorpt_special_details     ?
_exptl_crystal_colour              'clear dark red'
_exptl_crystal_colour_lustre       clear
_exptl_crystal_colour_modifier     dark
_exptl_crystal_colour_primary      red
_exptl_crystal_density_diffrn      1.144
_exptl_crystal_density_meas        ?
_exptl_crystal_density_method      ?
_exptl_crystal_description         needle
_exptl_crystal_F_000               836
_exptl_crystal_size_max            0.01
_exptl_crystal_size_mid            0.01
_exptl_crystal_size_min            0.01
_exptl_transmission_factor_max     ?
_exptl_transmission_factor_min     ?
_diffrn_reflns_av_R_equivalents    0.1101
_diffrn_reflns_av_unetI/netI       0.1356
_diffrn_reflns_Laue_measured_fraction_full  0.427
_diffrn_reflns_Laue_measured_fraction_max  0.993
_diffrn_reflns_limit_h_max         6
_diffrn_reflns_limit_h_min         -6
_diffrn_reflns_limit_k_max         23
_diffrn_reflns_limit_k_min         -21
_diffrn_reflns_limit_l_max         12
_diffrn_reflns_limit_l_min         -12
_diffrn_reflns_number              5850
_diffrn_reflns_point_group_measured_fraction_full  0.427
_diffrn_reflns_point_group_measured_fraction_max  0.993
_diffrn_reflns_theta_full          67.684
_diffrn_reflns_theta_max           44.312
_diffrn_reflns_theta_min           3.469
_diffrn_ambient_environment        N~2~
_diffrn_ambient_temperature        99.9(5)
_diffrn_detector                   'CCD plate'
_diffrn_detector_area_resol_mean   ?
_diffrn_measured_fraction_theta_full  0.427
_diffrn_measured_fraction_theta_max  0.993
_diffrn_measurement_details
;
List of Runs (angles in degrees, time in seconds):

  # Type    Start    End  Width  t~exp~   \w     \q     \k     \f   Frames
--------------------------------------------------------------------------
  1  \w    -45.00  30.00   1.00   60.00    --   43.00  60.00  30.00   75
  2  \w     85.00 132.00   1.00   60.00    --   43.00  60.00  30.00   47
  3  \w    -44.00  85.00   1.00   60.00    --   43.00  60.00 -90.00  129
  4  \w     55.00  96.00   1.00   60.00    --   43.00  10.00  30.00   41
  5  \w     46.00  73.00   1.00   60.00    --   43.00  20.00-180.00   27
  6  \w     89.00 122.00   1.00   60.00    --   43.00  20.00-180.00   33
  7  \w    -42.00 105.00   1.00   60.00    --   43.00  60.00 -30.00  147
;
_diffrn_measurement_device         'four-circle diffractometer'
_diffrn_measurement_device_type    'XtaLAB AFC11 (RINC): quarter-chi single'
_diffrn_measurement_method         '\w scans'
_diffrn_orient_matrix_type        
 'CrysAlisPro convention (1999,Acta A55,543-557)'
_diffrn_orient_matrix_UB_11        0.1713402000
_diffrn_orient_matrix_UB_12        -0.0097836000
_diffrn_orient_matrix_UB_13        -0.0666470000
_diffrn_orient_matrix_UB_21        0.0213303000
_diffrn_orient_matrix_UB_22        0.0596019000
_diffrn_orient_matrix_UB_23        -0.0153266000
_diffrn_orient_matrix_UB_31        0.1443432000
_diffrn_orient_matrix_UB_32        0.0028125000
_diffrn_orient_matrix_UB_33        0.0888080000
_diffrn_radiation_monochromator    mirror
_diffrn_radiation_probe            x-ray
_diffrn_radiation_type             CuK\a
_diffrn_radiation_wavelength       1.54184
_diffrn_source                     'Rotating-anode X-ray tube (dual wavelength)'
_diffrn_source_type                'Rigaku (Cu) X-ray DW Source'
_reflns_Friedel_coverage           0.000
_reflns_Friedel_fraction_full      .
_reflns_Friedel_fraction_max       .
_reflns_number_gt                  1022
_reflns_number_total               1853
_reflns_odcompleteness_completeness  98.57
_reflns_odcompleteness_iscentric   1
_reflns_odcompleteness_theta       44.45
_reflns_special_details
;
 Reflections were merged by SHELXL according to the crystal
 class for the calculation of statistics and refinement.
 
 Structure factors included contributions from the .fab file.
 
 _reflns_Friedel_fraction is defined as the number of unique
 Friedel pairs measured divided by the number that would be
 possible theoretically, ignoring centric projections and
 systematic absences.
;
_reflns_threshold_expression       'I > 2\s(I)'
_computing_cell_refinement         'CrysAlisPro 1.171.40.14d (Rigaku OD, 2018)'
_computing_data_collection         'CrysAlisPro 1.171.40.14d (Rigaku OD, 2018)'
_computing_data_reduction          'CrysAlisPro 1.171.40.14d (Rigaku OD, 2018)'
_computing_molecular_graphics      'Olex2 (Dolomanov et al., 2009)'
_computing_publication_material    'Olex2 (Dolomanov et al., 2009)'
_computing_structure_refinement    'ShelXL (Sheldrick, 2015)'
_computing_structure_solution      'XT (Sheldrick, 2015)'
_refine_diff_density_max           0.778
_refine_diff_density_min           -0.530
_refine_diff_density_rms           0.152
_refine_ls_extinction_coef         .
_refine_ls_extinction_method       none
_refine_ls_goodness_of_fit_ref     1.426
_refine_ls_hydrogen_treatment      constr
_refine_ls_matrix_type             full
_refine_ls_number_parameters       197
_refine_ls_number_reflns           1853
_refine_ls_number_restraints       289
_refine_ls_R_factor_all            0.2071
_refine_ls_R_factor_gt             0.1525
_refine_ls_restrained_S_all        1.392
_refine_ls_shift/su_max            0.000
_refine_ls_shift/su_mean           0.000
_refine_ls_structure_factor_coef   Fsqd
_refine_ls_weighting_details      
 'w=1/[\s^2^(Fo^2^)+(0.2000P)^2^] where P=(Fo^2^+2Fc^2^)/3'
_refine_ls_weighting_scheme        calc
_refine_ls_wR_factor_gt            0.4041
_refine_ls_wR_factor_ref           0.4306
_refine_special_details            ?
_olex2_refinement_description
;
1. Fixed Uiso
 At 1.2 times of:
  All C(H) groups
2. Restrained distances
 C8-C7 \\sim C9-C8 \\sim C9-C18 \\sim C18-C1 \\sim C2-C1 \\sim C3-C2 \\sim
C4-C3 \\sim C5-C4 \\sim C6-C5 \\sim C7-
 C6 \\sim C11-C10 \\sim C9-C10 \\sim C18-C17 \\sim C17-C16 \\sim C16-C11 \\sim
C12-C11 \\sim C15-C14 \\sim C14-
 C13 \\sim C13-C12
 with sigma of 0.02
3. Uiso/Uaniso restraints and constraints
C25 \\sim C24 \\sim C23: within 2A with sigma of 0.01 and sigma for terminal
atoms of 0.02
C12 \\sim C13 \\sim C14: within 2A with sigma of 0.01 and sigma for terminal
atoms of 0.02
4. Rigid body (RIGU) restrains
 C14, C13, C15, C12, C11, C16, C10, C9, C18, C17, C1, C8, C7, C2, C3, C4, C5,
 C6, O1, O2, O6, O5
 with sigma for 1-2 distances of 0.002 and sigma for 1-3 distances of 0.002
 Fe1, O4, O3, C20, C19, C21, C23, C24, C25, C26, C27, C22
 with sigma for 1-2 distances of 0.004 and sigma for 1-3 distances of 0.004
5. Others
 Sof(C15)=Sof(H15)=Sof(C14)=Sof(H14)=Sof(C13)=Sof(H13)=Sof(C12)=Sof(H12)=
 Sof(H7)=Sof(H2)=1-FVAR(1)
 Sof(H11)=Sof(H16)=Sof(C6)=Sof(H6)=Sof(C5)=Sof(H5)=Sof(C4)=Sof(H4)=Sof(C3)=
 Sof(H3)=FVAR(1)
 Fixed Sof: C23(0.5) H23(0.5) C24(0.5) H24(0.5) C25(0.5) H25(0.5) C26(0.5)
 H26(0.5) H27(0.5) H22(0.5)
6.a Aromatic/amide H refined with riding coordinates:
 C11(H11), C16(H16), C15(H15), C14(H14), C13(H13), C12(H12), C7(H7), C6(H6),
 C5(H5), C4(H4), C3(H3), C2(H2), C23(H23), C24(H24), C25(H25), C26(H26),
 C27(H27), C22(H22)
6.b Fitted hexagon refined as free rotating group:
 C11(C16,C15,C14,C13,C12), C7(C6,C5,C4,C3,C2), C23(C24,C25,C26,C27,C22)
;
_atom_sites_solution_hydrogens     geom
_atom_sites_solution_primary       dual
_atom_sites_solution_secondary     ?
loop_
  _atom_site_label
  _atom_site_type_symbol
  _atom_site_fract_x
  _atom_site_fract_y
  _atom_site_fract_z
  _atom_site_U_iso_or_equiv
  _atom_site_adp_type
  _atom_site_occupancy
  _atom_site_site_symmetry_order
  _atom_site_calc_flag
  _atom_site_refinement_flags_posn
  _atom_site_refinement_flags_adp
  _atom_site_refinement_flags_occupancy
  _atom_site_disorder_assembly
  _atom_site_disorder_group
 Fe1 Fe 0.5016(5) 0.34115(12) 0.4440(3) 0.0692(17) Uani 1 1 d . U . . .
 O2 O 0.654(2) 0.3382(5) 0.3215(10) 0.063(4) Uani 1 1 d . U . . .
 O1 O 0.324(2) 0.2951(5) 0.3716(11) 0.071(4) Uani 1 1 d . U . . .
 O4 O 0.3449(18) 0.4012(5) 0.4038(10) 0.064(4) Uani 1 1 d . U . . .
 O5 O 0.3449(19) 0.1670(5) 0.0588(10) 0.063(4) Uani 1 1 d . U . . .
 O3 O 0.681(2) 0.3900(5) 0.5000(11) 0.077(4) Uani 1 1 d . U . . .
 O6 O 0.656(2) 0.2176(5) -0.0006(11) 0.065(4) Uani 1 1 d . U . . .
 C20 C 0.507(3) 0.4709(7) 0.4863(16) 0.057(5) Uani 1 1 d . U . . .
 C19 C 0.342(3) 0.4519(8) 0.4291(17) 0.066(6) Uani 1 1 d . U . . .
 C18 C 0.481(3) 0.2713(6) 0.2265(13) 0.054(5) Uani 1 1 d D U . . .
 C9 C 0.491(2) 0.2380(6) 0.1443(13) 0.051(5) Uani 1 1 d D U . . .
 C17 C 0.632(3) 0.3074(7) 0.2470(15) 0.064(6) Uani 1 1 d D U . . .
 C21 C 0.668(3) 0.4415(8) 0.5239(16) 0.062(5) Uani 1 1 d . U . . .
 C8 C 0.343(2) 0.2006(7) 0.1263(14) 0.050(5) Uani 1 1 d D U . . .
 C1 C 0.334(3) 0.2667(7) 0.2946(15) 0.065(6) Uani 1 1 d D U . . .
 C11 C 0.793(3) 0.2811(7) 0.0972(15) 0.090(8) Uiso 1 1 d D U . . .
 H11 H 0.8933 0.2851 0.0546 0.108 Uiso 0.583(19) 1 calc R . P A 1
 C16 C 0.782(3) 0.3128(8) 0.1792(14) 0.095(8) Uiso 1 1 d DG U . A .
 H16 H 0.8769 0.3385 0.1902 0.114 Uiso 0.583(19) 1 calc R . P A 1
 C15 C 0.943(4) 0.3421(9) 0.2112(16) 0.060(16) Uiso 0.417(19) 1 d DG U P A 2
 H15 H 0.9364 0.3632 0.2660 0.072 Uiso 0.417(19) 1 calc R . P A 2
 C14 C 1.115(3) 0.3397(12) 0.161(2) 0.094(15) Uiso 0.417(19) 1 d DG U P A 2
 H14 H 1.2231 0.3593 0.1827 0.113 Uiso 0.417(19) 1 calc R . P A 2
 C13 C 1.126(3) 0.3080(13) 0.079(2) 0.092(15) Uiso 0.417(19) 1 d DG U P A 2
 H13 H 1.2406 0.3064 0.0459 0.110 Uiso 0.417(19) 1 calc R . P A 2
 C12 C 0.964(4) 0.2787(10) 0.0473(16) 0.084(15) Uiso 0.417(19) 1 d DG U P A 2
 H12 H 0.9714 0.2576 -0.0076 0.101 Uiso 0.417(19) 1 calc R . P A 2
 C10 C 0.646(3) 0.2427(7) 0.0803(16) 0.061(5) Uani 1 1 d D U . . .
 C7 C 0.181(2) 0.2019(7) 0.1896(13) 0.084(8) Uiso 1 1 d D U . . .
 H7 H 0.0733 0.1807 0.1742 0.101 Uiso 0.417(19) 1 calc R . P A 2
 C6 C 0.020(3) 0.1713(7) 0.1620(12) 0.078(13) Uiso 0.583(19) 1 d DG U P A 1
 H6 H 0.0225 0.1504 0.1065 0.094 Uiso 0.583(19) 1 calc R . P A 1
 C5 C -0.145(2) 0.1719(7) 0.2173(16) 0.062(12) Uiso 0.583(19) 1 d DG U P A 1
 H5 H -0.2529 0.1515 0.1988 0.074 Uiso 0.583(19) 1 calc R . P A 1
 C4 C -0.149(2) 0.2031(8) 0.3001(15) 0.049(11) Uiso 0.583(19) 1 d DG U P A 1
 H4 H -0.2597 0.2035 0.3371 0.058 Uiso 0.583(19) 1 calc R . P A 1
 C3 C 0.012(3) 0.2337(7) 0.3277(12) 0.079(13) Uiso 0.583(19) 1 d DG U P A 1
 H3 H 0.0089 0.2545 0.3832 0.094 Uiso 0.583(19) 1 calc R . P A 1
 C2 C 0.177(2) 0.2330(6) 0.2724(14) 0.086(8) Uiso 1 1 d DG U . A .
 H2 H 0.0711 0.2316 0.3126 0.103 Uiso 0.417(19) 1 calc R . P A 2
 C23 C 1.005(4) 0.4376(7) 0.591(2) 0.081(11) Uiso 0.5 1 d . U P B 1
 H23 H 1.0126 0.4028 0.5713 0.097 Uiso 0.5 1 calc R . P B 1
 C24 C 1.165(3) 0.4616(10) 0.638(2) 0.081(10) Uiso 0.5 1 d G U P B 1
 H24 H 1.2795 0.4428 0.6498 0.097 Uiso 0.5 1 calc R . P B 1
 C25 C 1.153(3) 0.5138(10) 0.667(2) 0.096(12) Uiso 0.5 1 d G U P B 1
 H25 H 1.2603 0.5298 0.6981 0.115 Uiso 0.5 1 calc R . P B 1
 C26 C 0.982(4) 0.5419(6) 0.6485(18) 0.090(16) Uani 0.5 1 d G U P B 1
 H26 H 0.9743 0.5768 0.6679 0.108 Uiso 0.5 1 calc R . P B 1
 C27 C 0.822(3) 0.5179(6) 0.6015(14) 0.074(7) Uani 1 1 d G U . . .
 H27 H 0.9215 0.5328 0.6406 0.089 Uiso 0.5 1 calc R . P B 2
 C22 C 0.834(3) 0.4658(7) 0.5726(15) 0.102(9) Uani 1 1 d G U . . .
 H22 H 0.9479 0.4468 0.5847 0.123 Uiso 0.5 1 calc R . P B 2

loop_
  _atom_site_aniso_label
  _atom_site_aniso_U_11
  _atom_site_aniso_U_22
  _atom_site_aniso_U_33
  _atom_site_aniso_U_23
  _atom_site_aniso_U_13
  _atom_site_aniso_U_12
 Fe1 0.083(3) 0.048(2) 0.079(3) 0.002(2) 0.019(2) -0.001(2)
 O2 0.075(9) 0.049(7) 0.068(8) -0.006(6) 0.020(7) -0.021(7)
 O1 0.083(10) 0.051(8) 0.080(8) -0.011(6) 0.025(7) -0.013(7)
 O4 0.055(8) 0.056(6) 0.081(10) -0.009(6) 0.020(7) -0.008(5)
 O5 0.073(9) 0.043(7) 0.074(9) -0.008(6) 0.015(7) -0.013(6)
 O3 0.072(8) 0.056(6) 0.104(11) 0.000(6) 0.001(7) 0.002(6)
 O6 0.076(9) 0.048(8) 0.071(8) -0.005(6) 0.011(6) 0.002(7)
 C20 0.055(9) 0.048(8) 0.069(13) -0.003(8) 0.020(8) -0.003(7)
 C19 0.058(10) 0.062(8) 0.080(14) -0.011(8) 0.020(9) -0.004(7)
 C18 0.062(8) 0.034(8) 0.067(7) -0.001(6) 0.012(6) -0.007(6)
 C9 0.053(8) 0.034(7) 0.066(7) -0.001(6) 0.005(6) 0.001(6)
 C17 0.074(9) 0.050(10) 0.068(9) -0.009(7) 0.020(7) -0.021(8)
 C21 0.056(9) 0.055(7) 0.075(13) 0.006(7) 0.022(8) -0.003(6)
 C8 0.053(8) 0.033(8) 0.063(9) 0.003(6) 0.001(6) 0.002(6)
 C1 0.074(9) 0.043(10) 0.079(9) -0.007(7) 0.024(7) -0.015(8)
 C10 0.060(8) 0.052(10) 0.073(8) -0.008(7) 0.012(7) -0.006(7)
 C26 0.08(2) 0.057(18) 0.12(4) 0.017(19) -0.05(2) 0.003(15)
 C27 0.071(14) 0.051(9) 0.098(18) 0.012(9) -0.037(12) 0.006(9)
 C22 0.075(11) 0.064(9) 0.17(2) -0.015(11) -0.021(13) 0.005(8)

_geom_special_details
;
 All esds (except the esd in the dihedral angle between two l.s. planes)
 are estimated using the full covariance matrix.  The cell esds are taken
 into account individually in the estimation of esds in distances, angles
 and torsion angles; correlations between esds in cell parameters are only
 used when they are defined by crystal symmetry.  An approximate (isotropic)
 treatment of cell esds is used for estimating esds involving l.s. planes.
;
loop_
  _geom_bond_atom_site_label_1
  _geom_bond_atom_site_label_2
  _geom_bond_distance
  _geom_bond_site_symmetry_2
  _geom_bond_publ_flag
 Fe1 O2 2.019(14) . ?
 Fe1 O1 1.934(15) . ?
 Fe1 O4 1.936(13) . ?
 Fe1 O5 1.958(14) 4_566 ?
 Fe1 O3 1.889(14) . ?
 Fe1 O6 1.968(13) 4_566 ?
 O2 C17 1.29(2) . ?
 O1 C1 1.29(2) . ?
 O4 C19 1.34(2) . ?
 O5 Fe1 1.958(14) 4_565 ?
 O5 C8 1.263(19) . ?
 O3 C21 1.36(2) . ?
 O6 Fe1 1.968(13) 4_565 ?
 O6 C10 1.29(2) . ?
 C20 C20 1.53(4) 3_666 ?
 C20 C19 1.43(3) . ?
 C20 C21 1.41(3) . ?
 C19 C27 1.41(5) 3_666 ?
 C18 C9 1.416(13) . ?
 C18 C17 1.403(13) . ?
 C18 C1 1.410(13) . ?
 C9 C8 1.406(13) . ?
 C9 C10 1.413(13) . ?
 C17 C16 1.426(13) . ?
 C21 C22 1.44(3) . ?
 C8 C7 1.441(13) . ?
 C1 C2 1.402(13) . ?
 C11 H11 0.9300 . ?
 C11 C16 1.3900 . ?
 C11 C12 1.3900 . ?
 C11 C10 1.416(13) . ?
 C16 H16 0.9300 . ?
 C16 C15 1.3900 . ?
 C15 H15 0.9300 . ?
 C15 C14 1.3900 . ?
 C14 H14 0.9300 . ?
 C14 C13 1.3900 . ?
 C13 H13 0.9300 . ?
 C13 C12 1.3900 . ?
 C12 H12 0.9300 . ?
 C7 H7 0.9300 . ?
 C7 C6 1.3900 . ?
 C7 C2 1.3900 . ?
 C6 H6 0.9300 . ?
 C6 C5 1.3900 . ?
 C5 H5 0.9300 . ?
 C5 C4 1.3900 . ?
 C4 H4 0.9300 . ?
 C4 C3 1.3900 . ?
 C3 H3 0.9300 . ?
 C3 C2 1.3900 . ?
 C2 H2 0.9300 . ?
 C23 H23 0.9300 . ?
 C23 C24 1.3900 . ?
 C23 C22 1.3900 . ?
 C24 H24 0.9300 . ?
 C24 C25 1.3900 . ?
 C25 H25 0.9300 . ?
 C25 C26 1.3900 . ?
 C26 H26 0.9300 . ?
 C26 C27 1.3900 . ?
 C27 C19 1.41(3) 3_666 ?
 C27 H27 0.9300 . ?
 C27 C22 1.3900 . ?
 C22 H22 0.9300 . ?

loop_
  _geom_angle_atom_site_label_1
  _geom_angle_atom_site_label_2
  _geom_angle_atom_site_label_3
  _geom_angle
  _geom_angle_site_symmetry_1
  _geom_angle_site_symmetry_3
  _geom_angle_publ_flag
 O1 Fe1 O2 83.4(6) . . ?
 O1 Fe1 O4 90.2(6) . . ?
 O1 Fe1 O5 89.7(6) . 4_566 ?
 O1 Fe1 O6 93.1(6) . 4_566 ?
 O4 Fe1 O2 95.3(6) . . ?
 O4 Fe1 O5 89.8(5) . 4_566 ?
 O4 Fe1 O6 173.8(6) . 4_566 ?
 O5 Fe1 O2 171.4(5) 4_566 . ?
 O5 Fe1 O6 85.0(6) 4_566 4_566 ?
 O3 Fe1 O2 90.8(6) . . ?
 O3 Fe1 O1 173.0(6) . . ?
 O3 Fe1 O4 86.6(6) . . ?
 O3 Fe1 O5 96.4(6) . 4_566 ?
 O3 Fe1 O6 90.8(6) . 4_566 ?
 O6 Fe1 O2 90.3(6) 4_566 . ?
 C17 O2 Fe1 129.5(11) . . ?
 C1 O1 Fe1 135.3(12) . . ?
 C19 O4 Fe1 134.6(15) . . ?
 C8 O5 Fe1 133.5(11) . 4_565 ?
 C21 O3 Fe1 133.3(14) . . ?
 C10 O6 Fe1 131.6(12) . 4_565 ?
 C19 C20 C20 114(2) . 3_666 ?
 C21 C20 C20 119(3) . 3_666 ?
 C21 C20 C19 127.2(19) . . ?
 O4 C19 C20 117(2) . . ?
 O4 C19 C27 118(3) . 3_666 ?
 C27 C19 C20 125(3) 3_666 . ?
 C17 C18 C9 119.6(15) . . ?
 C17 C18 C1 117.5(14) . . ?
 C1 C18 C9 122.7(15) . . ?
 C8 C9 C18 119.2(15) . . ?
 C8 C9 C10 120.3(14) . . ?
 C10 C9 C18 120.6(15) . . ?
 O2 C17 C18 128.1(15) . . ?
 O2 C17 C16 113.3(16) . . ?
 C18 C17 C16 118.6(18) . . ?
 O3 C21 C20 119(2) . . ?
 O3 C21 C22 118.0(19) . . ?
 C20 C21 C22 122.0(19) . . ?
 O5 C8 C9 123.9(14) . . ?
 O5 C8 C7 119.4(16) . . ?
 C9 C8 C7 116.7(16) . . ?
 O1 C1 C18 124.3(15) . . ?
 O1 C1 C2 117.2(16) . . ?
 C2 C1 C18 118.2(17) . . ?
 C16 C11 H11 120.9 . . ?
 C16 C11 C12 120.0 . . ?
 C16 C11 C10 118.3(19) . . ?
 C12 C11 C10 120.0(19) . . ?
 C10 C11 H11 120.9 . . ?
 C17 C16 H16 118.7 . . ?
 C11 C16 C17 122.5(19) . . ?
 C11 C16 H16 118.7 . . ?
 C15 C16 C17 115.6(19) . . ?
 C15 C16 C11 120.0 . . ?
 C16 C15 H15 120.0 . . ?
 C14 C15 C16 120.0 . . ?
 C14 C15 H15 120.0 . . ?
 C15 C14 H14 120.0 . . ?
 C13 C14 C15 120.0 . . ?
 C13 C14 H14 120.0 . . ?
 C14 C13 H13 120.0 . . ?
 C14 C13 C12 120.0 . . ?
 C12 C13 H13 120.0 . . ?
 C11 C12 H12 120.0 . . ?
 C13 C12 C11 120.0 . . ?
 C13 C12 H12 120.0 . . ?
 O6 C10 C9 124.5(16) . . ?
 O6 C10 C11 114.9(17) . . ?
 C9 C10 C11 120.3(18) . . ?
 C8 C7 H7 118.3 . . ?
 C6 C7 C8 116.6(16) . . ?
 C6 C7 C2 120.0 . . ?
 C2 C7 C8 123.4(16) . . ?
 C2 C7 H7 118.3 . . ?
 C7 C6 H6 120.0 . . ?
 C5 C6 C7 120.0 . . ?
 C5 C6 H6 120.0 . . ?
 C6 C5 H5 120.0 . . ?
 C6 C5 C4 120.0 . . ?
 C4 C5 H5 120.0 . . ?
 C5 C4 H4 120.0 . . ?
 C5 C4 C3 120.0 . . ?
 C3 C4 H4 120.0 . . ?
 C4 C3 H3 120.0 . . ?
 C2 C3 C4 120.0 . . ?
 C2 C3 H3 120.0 . . ?
 C1 C2 H2 120.5 . . ?
 C7 C2 C1 119.1(16) . . ?
 C7 C2 H2 120.5 . . ?
 C3 C2 C1 120.7(16) . . ?
 C3 C2 C7 120.0 . . ?
 C24 C23 H23 120.0 . . ?
 C24 C23 C22 120.0 . . ?
 C22 C23 H23 120.0 . . ?
 C23 C24 H24 120.0 . . ?
 C23 C24 C25 120.0 . . ?
 C25 C24 H24 120.0 . . ?
 C24 C25 H25 120.0 . . ?
 C26 C25 C24 120.0 . . ?
 C26 C25 H25 120.0 . . ?
 C25 C26 H26 120.0 . . ?
 C27 C26 C25 120.0 . . ?
 C27 C26 H26 120.0 . . ?
 C19 C27 H27 120.4 3_666 . ?
 C26 C27 C19 120.1(16) . 3_666 ?
 C26 C27 C22 120.0 . . ?
 C22 C27 C19 119.3(17) . 3_666 ?
 C22 C27 H27 120.4 . . ?
 C21 C22 H22 120.3 . . ?
 C23 C22 C21 120.5(16) . . ?
 C27 C22 C21 119.5(16) . . ?
 C27 C22 C23 120.0 . . ?
 C27 C22 H22 120.3 . . ?

_smtbx_masks_special_details       ?
loop_
  _smtbx_masks_void_nr
  _smtbx_masks_void_average_x
  _smtbx_masks_void_average_y
  _smtbx_masks_void_average_z
  _smtbx_masks_void_volume
  _smtbx_masks_void_count_electrons
  _smtbx_masks_void_content
 1 -0.290 0.000 0.500 386.0 127.0 ?
 2 -0.450 0.500 0.000 386.0 127.0 ?

_shelx_res_file
;
TITL lcam16_a.res in P2(1)/c
REM Old TITL lcam16 in P2/c
REM SHELXT solution in P2(1)/c
REM R1 0.306, Rweak 0.062, Alpha 0.170, Orientation as input
REM Formula found by SHELXT: C25 N7 O6 Br
CELL 1.54184 6.85703 25.483844 13.743308 90 92.4601 90
ZERR 4 0.00094 0.003086 0.002429 0 0.0142 0
LATT 1
SYMM -X,0.5+Y,0.5-Z
SFAC C H Fe O
UNIT 84 36 4 24
SADI C8 C7 C9 C8 C9 C18 C18 C1 C2 C1 C3 C2 C4 C3 C5 C4 C6 C5 C7 C6 C11 C10 =
 C9 C10 C18 C17 C17 C16 C16 C11 C12 C11 C15 C14 C14 C13 C13 C12
SIMU 0.01 0.02 2 C25 C24 C23
SIMU 0.01 0.02 2 C12 C13 C14
RIGU 0.002 0.002 C14 C13 C15 C12 C11 C16 C10 C9 C18 C17 C1 C8 C7 C2 C3 C4 =
 C5 C6 O1 O2 O6 O5
RIGU Fe1 O4 O3 C20 C19 C21 C23 C24 C25 C26 C27 C22

L.S. 25 0 0
PLAN  30
SIZE 0.01 0.01 0.01
BOND $H
list 4
fmap 2 53
ABIN
ACTA
OMIT 2 1 1
OMIT 2 0 0
OMIT 2 2 1
OMIT 2 2 0
REM <olex2.extras>
REM <HklSrc "%.\\lcam16.hkl">
REM </olex2.extras>

WGHT    0.200000
FVAR       0.54695   0.58308
FE1   3    0.501637    0.341151    0.443996    11.00000    0.08268    0.04767 =
         0.07864    0.00213    0.01870   -0.00060
O2    4    0.653622    0.338192    0.321535    11.00000    0.07474    0.04854 =
         0.06818   -0.00617    0.02010   -0.02069
O1    4    0.324217    0.295135    0.371595    11.00000    0.08346    0.05114 =
         0.08019   -0.01111    0.02531   -0.01268
O4    4    0.344899    0.401153    0.403781    11.00000    0.05467    0.05616 =
         0.08117   -0.00916    0.02040   -0.00770
O5    4    0.344926    0.167034    0.058777    11.00000    0.07268    0.04281 =
         0.07396   -0.00818    0.01452   -0.01263
O3    4    0.680922    0.389960    0.499978    11.00000    0.07224    0.05561 =
         0.10411   -0.00008    0.00112    0.00174
O6    4    0.656120    0.217573   -0.000641    11.00000    0.07607    0.04807 =
         0.07115   -0.00508    0.01089    0.00161
C20   1    0.507386    0.470920    0.486262    11.00000    0.05493    0.04778 =
         0.06920   -0.00271    0.01956   -0.00310
C19   1    0.342274    0.451881    0.429143    11.00000    0.05802    0.06150 =
         0.08017   -0.01101    0.01985   -0.00393
C18   1    0.481052    0.271284    0.226482    11.00000    0.06155    0.03375 =
         0.06749   -0.00092    0.01210   -0.00699
C9    1    0.490811    0.238034    0.144279    11.00000    0.05266    0.03417 =
         0.06621   -0.00100    0.00537    0.00098
C17   1    0.631650    0.307404    0.247018    11.00000    0.07352    0.05048 =
         0.06815   -0.00864    0.01954   -0.02110
C21   1    0.667594    0.441469    0.523882    11.00000    0.05586    0.05537 =
         0.07539    0.00588    0.02187   -0.00317
C8    1    0.342920    0.200633    0.126312    11.00000    0.05290    0.03341 =
         0.06314    0.00259    0.00130    0.00153
C1    1    0.333930    0.266734    0.294573    11.00000    0.07375    0.04261 =
         0.07909   -0.00723    0.02431   -0.01460
AFIX  66
C11   1    0.792591    0.281121    0.097220    11.00000    0.08962
PART 1
AFIX  43
H11   2    0.893329    0.285072    0.054613    21.00000   -1.20000
AFIX  65
PART 0
C16   1    0.782108    0.312780    0.179189    11.00000    0.09461
PART 1
AFIX  43
H16   2    0.876852    0.338460    0.190236    21.00000   -1.20000
AFIX  65
PART 0
PART 2
C15   1    0.943416    0.342062    0.211204   -21.00000    0.05999
AFIX  43
H15   2    0.936402    0.363243    0.266047   -21.00000   -1.20000
AFIX  65
C14   1    1.115209    0.339685    0.161250   -21.00000    0.09398
AFIX  43
H14   2    1.223135    0.359276    0.182670   -21.00000   -1.20000
AFIX  65
C13   1    1.125695    0.308026    0.079281   -21.00000    0.09168
AFIX  43
H13   2    1.240636    0.306436    0.045858   -21.00000   -1.20000
AFIX  65
C12   1    0.964388    0.278744    0.047265   -21.00000    0.08394
AFIX  43
H12   2    0.971403    0.257563   -0.007578   -21.00000   -1.20000
AFIX   0
PART 0
C10   1    0.645851    0.242693    0.080290    11.00000    0.05953    0.05203 =
         0.07257   -0.00787    0.01172   -0.00643
AFIX  66
C7    1    0.180764    0.201853    0.189562    11.00000    0.08376
PART 2
AFIX  43
H7    2    0.073326    0.180695    0.174153   -21.00000   -1.20000
AFIX  65
PART 0
PART 1
C6    1    0.019802    0.171303    0.161979    21.00000    0.07808
AFIX  43
H6    2    0.022527    0.150441    0.106532    21.00000   -1.20000
AFIX  65
C5    1   -0.145234    0.171934    0.217267    21.00000    0.06158
AFIX  43
H5    2   -0.252928    0.151495    0.198812    21.00000   -1.20000
AFIX  65
C4    1   -0.149308    0.203115    0.300139    21.00000    0.04871
AFIX  43
H4    2   -0.259729    0.203537    0.337131    21.00000   -1.20000
AFIX  65
C3    1    0.011653    0.233665    0.327724    21.00000    0.07856
AFIX  43
H3    2    0.008926    0.254527    0.383171    21.00000   -1.20000
AFIX  65
PART 0
C2    1    0.176690    0.233034    0.272436    11.00000    0.08592
PART 2
AFIX  43
H2    2    0.071119    0.231556    0.312629   -21.00000   -1.20000
AFIX  66
PART 0
PART 1
C23   1    1.004956    0.437643    0.590683    10.50000    0.08122
AFIX  43
H23   2    1.012636    0.402761    0.571331    10.50000   -1.20000
AFIX  65
C24   1    1.164840    0.461627    0.637690    10.50000    0.08102
AFIX  43
H24   2    1.279494    0.442793    0.649789    10.50000   -1.20000
AFIX  65
C25   1    1.153360    0.513763    0.666613    10.50000    0.09566
AFIX  43
H25   2    1.260334    0.529810    0.698064    10.50000   -1.20000
AFIX  65
C26   1    0.981997    0.541914    0.648530    10.50000    0.08242    0.05706 =
         0.12476    0.01655   -0.05389    0.00284
AFIX  43
H26   2    0.974317    0.576796    0.667881    10.50000   -1.20000
AFIX  65
PART 0
C27   1    0.822111    0.517929    0.601523    11.00000    0.07106    0.05117 =
         0.09753    0.01207   -0.03726    0.00569
PART 2
AFIX  43
H27   2    0.921469    0.532793    0.640618    10.50000   -1.20000
AFIX  65
PART 0
C22   1    0.833588    0.465794    0.572599    11.00000    0.07464    0.06418 =
         0.16623   -0.01466   -0.02125    0.00497
PART 2
AFIX  43
H22   2    0.947891    0.446807    0.584702    10.50000   -1.20000
AFIX   0
HKLF 4

REM  lcam16_a.res in P2(1)/c
REM R1 =  0.1525 for    1022 Fo > 4sig(Fo)  and  0.2071 for all    1853 data
REM    197 parameters refined using    289 restraints

END

WGHT      0.2000      0.0000

REM Highest difference peak  0.778,  deepest hole -0.530,  1-sigma level  0.152
Q1    1   0.6691  0.3418  0.4603  11.00000  0.05    0.78
Q2    1   1.2341  0.3783  0.1484  11.00000  0.05    0.75
Q3    1   0.5086  0.1614  0.0507  11.00000  0.05    0.71
Q4    1   0.4830  0.2927  0.3951  11.00000  0.05    0.54
Q5    1   1.3213  0.5039  0.7313  11.00000  0.05    0.50
Q6    1   0.3460  0.3798  0.4784  11.00000  0.05    0.46
Q7    1   0.8530  0.4126  0.5588  11.00000  0.05    0.45
Q8    1   1.2662  0.4845  0.7162  11.00000  0.05    0.44
Q9    1   0.3416  0.2032 -0.0048  11.00000  0.05    0.44
Q10   1   0.8656  0.4022  0.5494  11.00000  0.05    0.44
Q11   1   0.3660  0.2627  0.4119  11.00000  0.05    0.41
Q12   1   0.5000  0.5000  0.5000  10.50000  0.05    0.38
Q13   1   0.2198  0.1743  0.2300  11.00000  0.05    0.38
Q14   1  -0.1835  0.1405  0.2763  11.00000  0.05    0.37
Q15   1   0.7602  0.5248  0.6090  11.00000  0.05    0.36
Q16   1   0.8263  0.5533  0.5845  11.00000  0.05    0.36
Q17   1   0.6953  0.4747  0.5212  11.00000  0.05    0.35
Q18   1   0.8044  0.5406  0.5968  11.00000  0.05    0.35
Q19   1   0.3695  0.4333  0.4758  11.00000  0.05    0.34
Q20   1   1.0232  0.2624  0.0553  11.00000  0.05    0.33
Q21   1   1.4459  0.4605  0.1182  11.00000  0.05    0.33
Q22   1   0.3458  0.1604  0.1381  11.00000  0.05    0.31
Q23   1   0.5122  0.4188  0.4545  11.00000  0.05    0.31
Q24   1   0.8866  0.5788  0.6406  11.00000  0.05    0.29
Q25   1  -0.4013  0.1365  0.4256  11.00000  0.05    0.29
Q26   1  -0.2193  0.1226  0.2336  11.00000  0.05    0.29
Q27   1   1.0206  0.4940  0.9845  11.00000  0.05    0.29
Q28   1  -0.2408  0.2161  0.2020  11.00000  0.05    0.28
Q29   1   0.4906  0.3842  0.3945  11.00000  0.05    0.28
Q30   1   0.6634  0.3998  0.5558  11.00000  0.05    0.28
;
_shelx_res_checksum                29314
_shelx_hkl_file
;
   0   0   1-7.39324 14.8495   7
   0   0   2 8000.75 620.156   7
   0   0   3 15.3642 36.7497   7
   0   0   4 217.515 46.1845   7
   0   0   5-10.3615 43.4871   7
   0   0   6 55.2907 41.9927   7
   0   0   7-19.8576 44.3992   7
   0   0   8 282.274 49.2024   7
   0   0   9-37.9837 47.6562   7
   0   0  10 73.3417 53.5662   7
   0   0  10-19.7894 32.6604   2
   0   0  11 38.5155 31.1342   2
   0   0 -12-119.087 83.2981   3
   0  -1   1 2851.41 211.544   7
   0   1   1 2634.83 211.696   3
   0   1   1 2648.40 211.777   7
   0  -1   2 50.6889 22.3051   7
   0  -1   3 1590.01 128.162   7
   0  -1   4 130.056 38.5371   7
   0  -1   5 183.795 44.1266   7
   0  -1   6 219.495 45.7281   7
   0  -1   7 47.8401 43.3974   7
   0  -1   8 19.3278 43.5004   7
   0  -1   9 18.8549 49.7939   7
   0  -1  10 39.7692 50.6148   7
   0   1  10 9.04376 29.3500   2
   0  -1  10 2.15720 36.4700   2
   0  -1  11 10.4790 56.6266   7
   0  -1  11-7.25476 35.6947   2
   0   1 -12-0.59837 74.3217   3
   0  -1 -12-180.429 82.5015   3
   0   2   0 3135.89 232.517   3
   0   2   0 2881.34 232.454   6
   0   2  -1 682.418 55.8715   3
   0   2   1 598.395 55.6879   3
   0   2  -1 762.832 54.9763   5
   0   2   2 5353.63 397.139   3
   0  -2   2 4984.09 396.855   7
   0   2  -2 5089.42 396.577   5
   0  -2   3 1165.73 95.3638   7
   0  -2   4 166.723 37.1890   7
   0  -2   5 271.912 43.5768   7
   0  -2   6 28.3812 44.4498   7
   0  -2   7 36.4490 45.4058   7
   0  -2   8 44.0600 44.3763   7
   0   2   9 27.7104 25.0262   2
   0  -2   9 57.9749 46.7961   7
   0  -2  10 91.5857 53.4505   7
   0   2  10 63.8703 26.1976   2
   0  -2  11 48.7734 37.6195   2
   0   2 -12 31.8006 72.8481   3
   0   2  12 20.9922 54.9417   7
   0  -2  12 63.1361 34.1383   2
   0   3   0-6.73608 14.4962   6
   0   3   0-19.5155 15.6630   3
   0  -3   0 9.36791 15.4450   4
   0   3   1 4453.53 375.525   3
   0   3  -1 5239.27 375.533   3
   0  -3   2 2860.11 203.949   7
   0   3   2 2247.70 203.962   3
   0   3  -2 2778.57 204.200   3
   0   3  -2 2604.71 203.069   5
   0   3  -3 214.904 25.1652   5
   0   3   3 172.557 33.7161   3
   0   3  -3 139.112 37.1842   3
   0   3  -4 648.339 58.2458   5
   0  -3   4 731.714 63.7997   7
   0   3  -5 36.4141 28.0320   5
   0  -3   5 61.6375 41.0260   7
   0   3  -6-2.36425 27.2084   5
   0  -3   6 1.83571 42.6373   7
   0  -3   7 254.197 51.6244   7
   0  -3   8 53.4504 25.7305   4
   0  -3   8 98.0258 47.4888   7
   0   3   8 29.0485 45.5298   7
   0   3   9 276.782 50.3528   7
   0  -3   9 305.695 52.9398   7
   0   3  10 34.4523 47.4922   7
   0  -3  11 60.3688 40.3446   2
   0   3  11 77.5879 53.3043   7
   0  -3  12 63.6414 36.4698   2
   0   3  12 36.9231 50.6018   7
   0   3 -12-79.9220 80.5197   3
   0   4   0 2182.38 175.652   3
   0   4   0 2052.96 175.244   7
   0  -4   0 2425.96 175.548   4
   0   4   0 2367.77 175.421   6
   0   4   1 1131.78 89.4473   3
   0  -4   1 1192.63 90.1866   4
   0   4  -1 1283.43 89.2133   6
   0   4   1 1115.32 90.3150   6
   0   4  -1 927.039 89.7747   3
   0   4   1 1086.56 89.3114   7
   0  -4  -1 1077.77 89.3607   4
   0   4  -2 1588.24 137.660   3
   0   4   2 1878.55 138.026   7
   0   4   2 1778.68 137.610   3
   0  -4   3 302.102 36.4303   7
   0   4  -3 293.806 39.8562   3
   0   4   3 215.567 34.8441   3
   0   4  -3 283.651 28.2460   5
   0   4   3 265.749 40.8912   7
   0  -4   4 168.035 37.8642   7
   0   4  -4 125.847 23.3551   5
   0   4   4 138.673 49.6471   7
   0   4  -4 96.2720 37.6229   3
   0   4  -5 592.027 69.3343   3
   0  -4   5 970.865 72.1026   7
   0   4  -5 678.043 62.6962   5
   0   4   5 961.873 78.2000   7
   0   4   6 69.9484 50.8706   7
   0   4  -6 32.8092 24.0553   5
   0  -4   6 58.3048 45.5996   7
   0  -4   7 225.202 52.4106   7
   0   4   7 145.955 49.4634   7
   0  -4   8 282.277 32.8963   4
   0   4   8 406.241 50.4761   7
   0  -4   8 518.534 56.5533   7
   0   4   9 52.7038 47.4019   7
   0   4  10 77.3698 49.5191   7
   0  -4  11 5.19502 38.3464   2
   0   4  11-4.74781 47.7548   7
   0   4  12 27.1487 48.9126   7
   0   4 -12-102.996 84.2959   3
   0  -4  12-21.3052 37.1554   2
   0   5   0 27.3463 25.0617   6
   0   5   0-38.7784 26.3475   3
   0  -5   0 19.6284 26.0153   4
   0   5   0 9.08550 22.7908   7
   0  -5   1 1996.29 140.290   4
   0  -5  -1 1683.80 137.322   2
   0   5   1 1754.33 139.326   3
   0   5  -1 1687.48 140.043   3
   0   5   1 1775.08 139.373   7
   0   5   1 1919.13 140.090   6
   0  -5  -1 1833.32 139.518   4
   0   5  -1 2050.74 139.136   6
   0   5  -2 340.465 41.9256   3
   0   5   2 488.426 43.9032   7
   0   5   2 457.324 41.5048   3
   0   5  -3 284.983 40.2679   3
   0   5   3 237.087 36.3715   3
   0   5   3 223.663 36.7604   7
   0   5  -4 2206.87 167.782   3
   0   5   4 2623.25 170.254   7
   0  -5   5-21.7956 42.8227   7
   0   5  -5 10.5170 37.2685   3
   0   5   5-30.4757 47.8310   7
   0   5  -5 17.4192 22.9164   5
   0   5   6 9.99260 49.1867   7
   0   5   6 5.28826 14.0893   2
   0  -5   6 82.7355 49.6592   7
   0   5  -6 43.8024 23.4291   5
   0   5  -6 47.7262 40.2208   3
   0  -5   7 211.711 31.1496   4
   0   5   7 223.983 50.0253   7
   0   5   8 89.5021 18.7060   2
   0  -5   8 126.042 28.8191   4
   0   5   9 7.77003 42.1855   7
   0   5  10 47.3086 43.6271   7
   0  -5  11 38.2306 40.4880   2
   0   5  11 93.3046 46.8228   7
   0   5 -12 65.5436 82.1494   3
   0   5  12-59.4063 45.8938   7
   0  -5  12 49.9814 37.7976   2
   0   6   0 1921.49 145.733   3
   0   6   0 1747.11 144.464   7
   0   6   0 1857.35 145.151   6
   0  -6   0 1835.58 145.151   4
   0  -6  -1 24.7875 10.5950   2
   0   6   1 26.5830 27.4436   3
   0   6  -1-1.47728 23.3225   7
   0   6   1 13.9573 30.1816   6
   0   6  -1 16.5018 26.0979   6
   0   6   1 19.9338 25.7910   7
   0  -6  -1 17.0940 29.7077   4
   0  -6   1 15.8960 29.0276   4
   0   6  -1 37.1405 28.7620   3
   0   6  -2 78.4981 25.9834   3
   0   6  -2 56.0012 27.2287   6
   0   6   2 66.1515 28.7863   3
   0   6   2 66.7226 28.7923   7
   0   6  -3 74.8853 30.9546   3
   0   6   3 136.061 33.0199   7
   0   6   3 76.0865 31.6668   3
   0  -6   3 130.904 32.2691   4
   0   6  -4-9.52075 38.7644   3
   0   6   4 22.3386 32.5996   3
   0   6   4 36.5428 41.3319   7
   0  -6   4 36.5141 31.6799   4
   0   6  -5 23.6326 38.1779   3
   0  -6   5 65.8867 31.6975   4
   0   6   5 93.1032 51.6049   7
   0   6   5 26.3183 11.8857   2
   0   6  -6 99.0427 42.1002   3
   0   6   6 106.440 47.1515   7
   0   6   6 61.8684 13.4317   2
   0  -6   6 76.5874 32.6091   4
   0   6  -7 277.357 48.2656   3
   0   6   7 341.254 52.3957   7
   0  -6   7 290.172 38.8753   4
   0  -6   8 760.290 70.1308   4
   0   6   8 993.549 81.2655   7
   0  -6   9-0.16218 26.4330   4
   0   6   9 71.3650 45.0279   7
   0   6  10 322.510 51.6631   7
   0  -6  11-14.6188 40.9236   2
   0   6  11 46.8058 44.6379   7
   0  -6  12 23.8474 39.1595   2
   0   7   0 1.62848 33.3618   3
   0  -7   0-7.22076 30.1821   4
   0   7   0 5.20979 28.1522   7
   0   7   0-11.5041 31.1829   6
   0   7   1 104.108 35.9637   6
   0  -7  -1 199.326 35.0025   4
   0  -7  -1 134.858 16.2407   2
   0   7   1 111.978 29.6554   7
   0   7  -1 97.7315 31.6160   3
   0   7  -1 181.443 32.1027   6
   0   7  -1 125.003 27.0492   7
   0   7   1 135.106 31.6681   3
   0  -7   1 144.601 33.2993   4
   0   7  -2 112.195 28.8394   3
   0   7  -2 76.3123 28.5639   6
   0   7   2 47.3342 27.5280   3
   0   7   2 32.0720 28.9293   7
   0  -7   3 87.7541 32.5891   4
   0   7   3 59.9301 31.5580   7
   0   7  -3 79.1710 27.8099   6
   0   7   3 24.7639 32.2902   3
   0   7  -3 106.885 32.7796   3
   0   7   4 463.508 51.0630   3
   0  -7   4 469.404 48.8949   4
   0   7  -4 438.082 52.7189   3
   0   7   4 534.336 53.3902   7
   0   7   5 69.7513 48.6227   7
   0   7  -5 46.3058 42.5521   3
   0  -7   5 9.56575 34.1237   4
   0   7   5 11.3658 31.7155   3
   0  -7   6 25.7087 33.9854   4
   0   7   6 79.7377 48.1191   7
   0   7  -6 53.1900 43.6465   3
   0   7  -7 825.849 82.8885   3
   0  -7   7 869.811 76.4748   4
   0   7   7 970.666 85.1812   7
   0  -7   8 132.726 31.5686   4
   0   7   8 205.102 45.3557   7
   0  -7   9 307.935 39.1269   4
   0   7   9 384.751 52.9986   7
   0   7  10 10.7456 43.1678   7
   0   7  11 135.503 43.2104   7
   0  -7  11 24.0747 40.9989   2
   0   8   0 1265.24 103.941   6
   0  -8   0 1247.24 103.949   4
   0   8   0 1310.98 104.066   3
   0   8   0 1243.24 102.768   7
   0  -8  -1 308.515 28.8726   2
   0   8  -1 365.858 42.1769   3
   0  -8   1 342.746 42.5593   4
   0   8   1 374.182 39.5640   7
   0   8  -1 395.589 41.5700   6
   0  -8  -1 321.823 41.8638   4
   0   8  -1 249.206 36.6691   7
   0   8   1 362.022 41.2750   3
   0   8   2 60.1415 31.7278   3
   0   8   2 91.2680 29.7714   7
   0   8  -2 126.631 31.4458   6
   0   8  -2 90.7793 30.2378   3
   0   8   3 132.926 36.4196   3
   0  -8   3 148.810 37.2619   4
   0   8   3 84.2693 33.1898   7
   0   8  -3 288.132 35.5891   3
   0   8  -3 221.931 30.7117   6
   0   8  -4 14.5776 26.6453   6
   0   8  -4 18.1658 35.4929   3
   0  -8   4-0.93039 35.7502   4
   0   8   4 1.57138 34.3016   7
   0   8   4 35.4820 34.6667   3
   0   8   5 10.0384 39.9618   7
   0   8  -5 51.1815 26.4302   6
   0  -8   5 47.1613 33.5494   4
   0   8  -5 107.752 39.7399   3
   0   8   5 47.3564 33.9151   3
   0   8  -6-28.7918 40.4217   3
   0  -8   6-9.66630 33.9525   4
   0   8   6 10.9951 41.6945   7
   0   8   7 738.333 68.5886   7
   0  -8   7 599.322 60.0030   4
   0   8  -7 581.788 65.6420   3
   0  -8   8 66.5874 32.1875   4
   0   8   8 79.3702 41.5855   7
   0   8  -8 51.1764 45.9606   3
   0   8   9 6.55321 43.7012   7
   0  -8   9 66.1465 31.3714   4
   0   8  10 36.2337 40.0643   7
   0  -8  11 97.9441 42.6210   2
   0   8  11 62.3986 44.2054   7
   0   9   0 262.631 40.8666   3
   0   9   0 356.661 41.1848   6
   0  -9   0 293.963 40.9287   4
   0   9  -1 1113.19 86.5982   6
   0   9   1 1097.88 85.5922   7
   0  -9  -1 957.485 80.1373   2
   0  -9   1 1130.15 87.9945   4
   0   9   1 1017.00 85.2925   3
   0  -9  -1 1157.68 86.7674   4
   0   9  -1 937.779 83.8527   7
   0   9  -1 984.111 86.0963   3
   0   9   2 117.558 31.8504   7
   0   9  -2 111.732 30.5430   3
   0   9   2 131.920 32.2920   3
   0   9  -2 119.130 32.5139   6
   0   9  -2 101.459 27.0842   7
   0   9  -3 140.406 34.4226   3
   0   9   3 59.9642 30.8815   7
   0   9  -3 137.617 31.5982   6
   0   9   3 22.1340 32.2398   3
   0   9  -4 15.6489 27.9344   6
   0   9   4 75.9348 35.6365   3
   0  -9   4 49.6571 37.1569   4
   0   9  -4 87.8426 41.4527   3
   0   9   4 65.5178 34.1448   7
   0   9  -5 84.1413 25.3459   6
   0  -9   5 71.4955 34.3737   4
   0   9  -5 123.533 44.4644   3
   0   9   5 80.5334 36.5655   3
   0   9   5 45.0194 40.0883   7
   0   9   6 592.065 64.4976   7
   0   9  -6 652.811 63.1318   3
   0  -9   6 599.224 59.9479   4
   0   9  -7 817.553 76.5405   3
   0   9   7 885.350 81.0708   7
   0  -9   7 843.351 75.1509   4
   0  -9   8 41.8436 30.6238   4
   0   9  -8 62.4678 42.1989   3
   0   9   8 49.6763 44.9588   7
   0   9   9 623.005 63.0160   7
   0  -9   9 586.402 57.2501   4
   0   9  10 61.3639 42.9494   7
   0  -9  11 106.853 43.9955   2
   0   9  11 105.857 42.0524   7
   0  10   0 959.517 84.5882   7
   0 -10   0 1030.63 87.7192   4
   0  10   0 1023.02 86.5507   6
   0  10   0 993.945 87.2797   3
   0  10  -1 213.156 35.9415   6
   0 -10   1 214.737 38.1276   4
   0 -10  -1 94.3716 18.7373   2
   0 -10  -1 244.735 39.7581   4
   0  10  -1 159.645 31.4771   7
   0  10   1 158.829 36.8349   7
   0  10  -1 127.934 38.4710   3
   0  10   1 217.362 38.3018   3
   0  10   2 257.218 39.3026   3
   0  10  -2 317.908 39.2817   6
   0  10  -2 190.683 32.8769   7
   0  10   2 247.598 37.5629   7
   0  10  -2 274.564 39.1063   3
   0  10   3 8.25924 29.6151   7
   0  10  -3 21.9023 30.6618   6
   0  10   3-2.25489 32.5178   3
   0  10  -3 79.6282 37.0717   3
   0  10  -4 60.7697 38.3265   3
   0  10   4 70.9386 35.5893   3
   0 -10   4 33.6031 37.6657   4
   0  10   4-1.27363 33.1324   7
   0  10  -4 36.0575 29.2257   6
   0  10   5 5.04971 34.4428   3
   0  10  -5 26.1060 26.1272   6
   0  10  -5 30.1167 39.6436   3
   0  10   5 8.10122 34.6401   7
   0 -10   5 57.5891 34.8658   4
   0  10   6 131.561 36.7702   3
   0  10  -6 179.662 45.1236   3
   0  10   6 105.090 44.6361   7
   0 -10   6 180.371 39.6717   4
   0  10   7 207.134 45.8773   7
   0 -10   7 163.007 35.8107   4
   0  10  -7 145.996 41.1622   3
   0 -10   8 830.098 74.7698   4
   0  10  -8 768.367 78.7226   3
   0  10   8 888.490 80.0857   7
   0  10   9-23.1851 42.5894   7
   0 -10   9 5.83114 32.8238   4
   0  10  10 311.825 46.9332   7
   0  10  11 107.951 43.0701   7
   0 -10  11 50.5529 44.4651   2
   0  11   0 13.7331 38.6189   6
   0 -11   0 14.8083 20.4474   2
   0  11   0-6.63015 40.8017   3
   0  11   0 14.2918 33.7455   7
   0 -11   0 39.9311 41.0441   4
   0  11  -1 97.4440 37.6745   3
   0  11   1 53.2469 36.5715   7
   0 -11  -1 58.3850 15.6074   2
   0  11   1 65.0994 37.3139   3
   0  11  -1 79.3089 30.5754   7
   0 -11   1 61.8956 37.2893   4
   0  11  -1 105.992 39.6408   6
   0  11  -2 60.8505 33.0756   3
   0  11  -2 32.6852 27.8041   7
   0  11   2 74.4085 35.9034   3
   0  11   2 90.7143 33.1876   7
   0  11  -2 91.2264 36.2571   6
   0 -11   2 97.4397 37.0316   4
   0  11   3 113.585 33.2720   3
   0  11  -3 118.319 32.9763   6
   0  11  -3 172.077 37.9231   3
   0  11  -3 91.9776 28.4994   7
   0  11   3 103.655 31.8448   7
   0  11  -4 243.624 41.0262   3
   0 -11   4 274.794 43.1395   4
   0  11   4 192.067 38.7690   3
   0  11   4 230.405 37.4337   7
   0  11  -4 174.986 34.6408   6
   0  11   5-11.9660 37.9595   7
   0  11  -5 97.3130 41.1054   3
   0  11   5 0.40475 37.8140   3
   0  11  -5 19.1322 25.9839   6
   0 -11   5 14.0374 36.8807   4
   0 -11   6 559.482 56.6260   4
   0  11   6 572.707 59.9596   7
   0  11   6 411.546 54.7401   3
   0  11  -6 542.895 61.1698   3
   0  11  -7 81.2859 41.4546   3
   0  11   7 78.5107 43.8329   7
   0 -11   7 108.387 38.9035   4
   0  11   8 28.7820 46.3241   7
   0 -11   8 104.453 36.3076   4
   0  11  -8 95.5568 41.9088   3
   0 -11   9-21.1440 36.6549   4
   0  11  -9 30.7006 47.4669   3
   0  11   9 5.30499 40.2878   7
   0  11  10 52.4746 38.3121   7
   0  12   0 195.412 36.1247   7
   0 -12   0 144.254 23.4490   2
   0  12   0 134.397 44.0258   3
   0 -12   0 126.517 44.2229   4
   0  12  -1 38.1120 36.1132   3
   0  12   1 72.0649 40.2993   3
   0 -12   1 39.8368 42.1717   4
   0  12  -1 76.3638 30.2726   7
   0  12   1 37.2603 37.4135   7
   0  12  -1 95.0891 39.0598   6
   0  12   2 26.1892 34.7042   3
   0  12  -2 32.3012 28.3510   7
   0  12  -2 26.3079 37.6015   6
   0  12  -2-10.3993 34.5096   3
   0  12   2 10.6888 33.4911   7
   0 -12   2 47.6125 40.0242   4
   0  12  -3 26.1875 33.1183   3
   0  12  -3 14.9145 27.9469   7
   0  12  -3 5.15077 33.2915   6
   0  12   3 6.60784 33.7229   3
   0  12   3 46.7313 31.0288   7
   0  12  -4 57.9470 38.8248   3
   0  12   4 17.7450 32.8365   7
   0  12  -4-2.04861 31.2923   6
   0  12   4-7.58318 36.1131   3
   0 -12   4 23.4398 40.0452   4
   0  12  -4-35.5183 29.0974   7
   0  12   5 144.670 40.4792   3
   0 -12   5 253.850 42.8449   4
   0  12   5 173.322 40.6405   7
   0  12  -5 152.321 42.0458   3
   0  12  -5 105.972 30.6550   6
   0  12   6 133.967 46.2272   7
   0  12   6 135.689 38.2817   3
   0  12  -6 180.997 45.7321   3
   0 -12   6 128.159 40.8421   4
   0  12   7 157.261 44.9504   7
   0  12  -7 183.104 46.5056   3
   0 -12   7 168.542 43.3302   4
   0 -12   8 690.788 69.0260   4
   0  12   8 696.474 72.8116   7
   0  12  -8 729.115 71.2229   3
   0 -12   9-36.9339 36.5025   4
   0  12  -9 30.2008 46.0016   3
   0  12   9-57.9137 41.5969   7
   0  12  10 143.443 40.6492   7
   0 -12  10 215.669 51.4704   2
   0 -13   0 5.25491 19.9469   2
   0 -13   0 37.6364 44.1212   4
   0  13   0 8.07534 40.9334   3
   0  13   0 2.97808 32.4963   7
   0  13   1 170.052 41.3638   3
   0  13  -1 155.475 44.1886   6
   0  13  -1 100.720 31.6953   7
   0 -13   1 187.044 43.4478   4
   0  13   1 175.629 37.3928   7
   0  13  -1 85.8091 39.9735   3
   0 -13   2 109.118 38.7187   4
   0  13  -2 110.743 29.0549   7
   0  13  -2 76.6127 40.8080   6
   0  13  -2 62.3795 36.2968   3
   0  13   2 124.795 34.4411   7
   0  13   2 109.279 38.3842   3
   0  13  -3 47.8214 36.2084   6
   0  13   3 31.6308 31.3514   7
   0  13   3 24.1383 33.8573   3
   0  13  -3 16.1770 35.7591   3
   0  13  -3 33.7307 27.4774   7
   0  13   4 153.240 35.7621   3
   0  13  -4 127.541 34.6403   6
   0  13   4 110.254 34.1246   7
   0  13  -4 70.1211 30.1530   7
   0 -13   4 117.343 40.2306   4
   0  13  -4 100.700 39.5280   3
   0  13  -5-14.4981 30.1833   7
   0  13   5 46.0618 35.3077   3
   0  13  -5 20.7320 42.4966   3
   0  13  -5 10.0299 29.9537   6
   0  13   5-18.8236 38.6825   7
   0 -13   5 44.7527 41.4143   4
   0  13  -6-46.9004 34.3952   7
   0  13   6-34.9608 38.3272   3
   0  13  -6 67.2674 41.7259   3
   0 -13   6 31.1840 41.8796   4
   0  13   6 40.5038 43.9214   7
   0  13  -7 300.129 50.2379   3
   0 -13   7 296.424 46.6216   4
   0  13   7 293.087 50.4366   7
   0  13   8 52.4568 46.4372   7
   0 -13   8 52.8893 39.3467   4
   0  13  -8 68.7602 46.3510   3
   0  13   9 300.855 50.7125   7
   0 -13   9 324.940 57.2078   2
   0  13  -9 440.081 55.7247   3
   0 -13   9 329.165 48.6448   4
   0 -13  10 30.8457 47.3746   2
   0  13  10-15.6783 40.3683   7
   0  14   0 148.348 42.0172   3
   0 -14   0 104.820 44.7910   4
   0  14   0 129.130 33.3851   7
   0  14  -1 409.715 46.8592   3
   0  14   1 425.244 45.9802   7
   0  14   1 438.562 48.5169   3
   0 -14   1 311.172 37.3505   2
   0 -14   1 439.369 50.3346   4
   0  14  -1 354.473 40.8406   7
   0  14  -2 2.83947 38.1284   6
   0  14  -2 21.8244 35.7777   3
   0  14  -2 10.8645 26.4417   7
   0  14   2-10.0841 36.1120   3
   0  14   2 4.20495 32.3096   7
   0 -14   2-18.3750 42.2174   4
   0  14  -3 259.128 40.5374   3
   0  14   3 220.725 37.7977   7
   0  14  -3 372.607 44.6828   6
   0  14  -3 242.132 34.3653   7
   0  14   3 263.156 41.5431   3
   0  14   4 14.9875 33.9164   7
   0  14  -4-6.25941 35.7192   6
   0  14   4 80.9854 34.2283   3
   0  14  -4-14.9680 28.5448   7
   0  14  -4 7.85296 34.9166   3
   0 -14   4-17.7611 41.7381   4
   0 -14   5 181.931 44.1091   4
   0  14  -5 154.630 33.6691   7
   0  14   5 244.991 42.3717   7
   0  14   5 148.373 42.0052   3
   0  14  -5 180.302 44.6644   3
   0 -14   6-19.6562 43.6414   4
   0  14  -6-14.4915 30.2959   7
   0  14   6 4.29298 34.0783   3
   0  14  -6 38.5100 44.2130   3
   0  14   6 63.4712 44.4671   7
   0  14   7 122.094 43.8908   7
   0 -14   7 127.550 45.7137   4
   0  14  -7 164.510 44.4435   3
   0  14  -7 56.0581 34.6805   7
   0 -14   8 42.1587 45.7832   4
   0  14   8-12.1395 41.8410   7
   0  14  -8-50.7936 37.6099   7
   0 -14   8 30.2604 46.5965   2
   0  14  -8 101.374 44.3305   3
   0 -14   9 111.054 43.4637   4
   0  14  -9-34.7853 40.0706   7
   0  14   9-19.4220 38.8595   7
   0  14  -9 130.327 45.6700   3
   0 -14   9-20.8940 48.5562   2
   0  15   0 114.620 40.7788   3
   0  15   0 64.1162 31.2099   7
   0 -15   1 1659.08 129.746   4
   0  15   1 1706.72 126.873   7
   0  15  -1 1782.10 129.205   3
   0  15   1 1712.29 130.377   3
   0  15  -1 1287.70 125.257   7
   0  15   2 433.375 47.7756   7
   0 -15   2 432.238 43.7358   2
   0  15   2 535.340 51.3863   3
   0  15  -2 530.694 49.9889   3
   0 -15   2 500.797 54.0059   4
   0  15  -2 364.172 43.6104   7
   0  15  -3 186.680 37.0597   3
   0  15   3 192.072 40.8193   3
   0  15  -3 114.377 30.2883   7
   0  15   3 168.703 33.9182   7
   0  15   4 114.010 38.7796   3
   0  15  -4 103.356 38.7602   3
   0  15  -4 102.517 38.8892   6
   0  15   4 133.719 36.0804   7
   0 -15   4 93.3526 43.6459   4
   0  15  -4 125.466 30.5576   7
   0 -15   5-9.91099 45.3356   4
   0  15  -5-39.2787 38.7963   3
   0  15   5-6.85447 39.5708   3
   0  15  -5 11.5459 28.7521   7
   0  15   5 7.67199 39.4808   7
   0  15  -6 127.787 42.8473   3
   0  15   6 11.4391 38.4046   3
   0 -15   6 154.194 46.4140   4
   0  15   6 78.9370 43.7420   7
   0  15  -6 90.9570 32.5824   7
   0 -15   7 232.213 51.2420   4
   0 -15   7 170.991 49.6211   2
   0  15  -7 193.715 35.1302   7
   0  15  -7 346.604 50.0524   3
   0  15   7 266.023 48.5836   7
   0  15  -8 86.1338 45.4917   3
   0 -15   8 77.8648 47.8321   2
   0 -15   8 72.8506 45.7818   4
   0  15  -8 3.08468 30.2484   7
   0  15   8 29.5972 41.7351   7
   0  15  -9 248.819 46.5988   3
   0 -15   9 131.768 49.8745   2
   0  15  -9 129.727 36.6170   7
   0 -15   9 254.057 45.0123   4
   0  16   0 1472.55 125.745   7
   0  16   0 1738.84 129.016   3
   0  16  -1-49.3968 27.1285   7
   0  16   1-1.32129 41.3398   3
   0  16   1-66.1845 31.0565   7
   0  16  -1-70.2330 38.4651   3
   0 -16   1 13.8149 42.5645   4
   0  16  -2 457.900 48.5038   3
   0 -16   2 497.132 55.0159   4
   0  16   2 367.030 45.9987   7
   0  16  -2 354.659 42.9481   7
   0 -16   2 493.900 41.1549   2
   0  16   2 495.953 51.7896   3
   0  16   3 107.074 32.2984   7
   0 -16   3 164.961 32.0165   2
   0  16  -3 93.8406 28.3043   7
   0  16  -3 128.240 35.3847   3
   0  16   3 137.333 41.4266   3
   0  16  -4 10.5395 38.4891   3
   0  16   4-24.7496 39.4691   3
   0 -16   4-3.95197 33.2554   2
   0  16   4 25.4125 33.8674   7
   0  16  -4 40.3980 30.2476   7
   0 -16   4 33.6492 45.2386   4
   0 -16   5 68.9955 48.0802   4
   0 -16   5 37.9646 40.2793   2
   0  16   5 50.1516 39.3318   3
   0  16   5 1.85263 40.1790   7
   0  16  -5 29.0115 32.2315   7
   0  16  -5-21.5345 39.6893   3
   0 -16   6 56.1479 51.6445   4
   0 -16   6 47.1300 42.9099   2
   0  16   6 49.9647 42.5106   7
   0  16  -6 8.00706 30.2635   7
   0  16   6-21.5193 37.8043   3
   0  16  -6 90.4911 43.8891   3
   0  16  -7 66.8476 32.4376   7
   0 -16   7 76.7562 50.8252   4
   0 -16   7 36.1450 48.4925   2
   0  16   7 66.4135 42.6404   7
   0  16  -7 7.45172 42.4046   3
   0  16  -8 43.5286 32.3448   7
   0 -16   8 91.0599 49.6321   4
   0 -16   8 165.504 47.9768   2
   0  16  -8 130.332 42.5372   3
   0  17   0-0.15745 26.7844   7
   0  17   0-18.6428 38.6422   3
   0  17   1 37.8783 28.3456   7
   0  17   1 60.9997 44.0997   3
   0  17  -1 67.7831 26.4102   7
   0  17  -1-1.90816 35.8050   3
   0  17  -2 254.654 41.3434   3
   0  17   2 226.611 34.2186   7
   0  17  -2 223.164 31.6015   7
   0 -17   2 238.889 46.3572   4
   0  17   2 230.457 45.5039   3
   0  17  -3-12.5518 27.6549   7
   0  17  -3-27.6371 35.3781   3
   0  17   3-30.4409 29.5788   7
   0  17   3 9.27657 41.0807   3
   0 -17   4 250.771 48.9385   4
   0  17  -4 141.237 33.1216   7
   0 -17   4 151.070 36.3386   2
   0  17  -4 140.050 40.4883   3
   0  17   4 207.855 42.7620   3
   0  17   4 193.335 37.1555   7
   0  17   5-27.8934 41.0091   7
   0  17  -5 18.0137 33.2266   7
   0  17  -5 13.3508 43.6216   3
   0  17   5 9.62052 39.2944   3
   0 -17   5 69.5481 40.3307   2
   0 -17   5 71.6658 49.0749   4
   0 -17   6 98.4302 52.0326   4
   0  17   6-10.8259 36.9464   3
   0 -17   6 39.3981 43.7513   2
   0  17  -6 61.8474 32.6216   7
   0  17  -6 75.1917 41.5364   3
   0 -17   7 54.6661 50.9737   4
   0 -17   7 43.6951 47.0510   2
   0  17  -7-57.8412 42.1829   3
   0  17  -7 4.48188 31.8282   7
   0  17  -8 41.3836 41.1682   3
   0 -17   8-8.87810 47.5687   4
   0 -17   8-60.6505 47.7592   2
   0  18   0 679.035 67.6162   3
   0  18  -1 90.9688 39.8054   3
   0  18   1 32.1498 42.2830   3
   0  18  -2 266.730 42.8355   3
   0  18  -2 193.167 32.3557   7
   0  18   2 270.370 43.6098   3
   0  18   3 460.988 60.3291   3
   0  18  -3 547.214 55.3323   3
   0  18   4 69.2566 41.0280   3
   0  18  -4 77.0952 39.4349   3
   0 -18   4 78.0681 48.9148   4
   0  18   5 89.0160 42.9623   3
   0 -18   5 92.5203 39.9505   2
   0 -18   5 84.5998 52.1221   4
   0  18  -5 105.406 42.7605   3
   0 -18   6 56.9147 53.8175   4
   0  18  -6 20.9779 44.0737   3
   0 -18   6 20.3917 42.5077   2
   0  18   6 10.6021 39.2873   3
   0 -18   7 39.1044 46.9151   2
   0  18  -7-22.6562 40.7254   3
   0 -18   7 56.5805 51.2701   4
   0  19   0-62.7368 42.3322   3
   0  19   1 978.041 82.7009   3
   0  19  -1 844.055 80.5705   3
   0  19  -2-1.34105 36.6287   3
   0  19   2 3.31452 41.7147   3
   0  19  -3 94.3961 40.4720   3
   0  19   3 149.771 46.9927   3
   0  19  -4-34.2094 40.1751   3
   0  19   4 45.5354 41.4836   3
   0 -19   5-7.10706 54.0405   4
   0  19  -5 49.4146 42.2086   3
   0  19   5 60.3248 43.8074   3
   0  19   6-37.2822 38.7796   3
   0 -19   6-51.9227 54.9916   4
   0  19  -6-27.5970 42.5385   3
   0 -19   7 54.1138 46.9560   2
   0  19  -7 74.6906 39.9454   3
   0  20   0 106.370 44.5929   3
   0  20   1 58.9761 38.9705   3
   0  20  -1 44.8947 39.2933   3
   0  20   2 46.0390 40.1688   3
   0  20  -2-4.00971 38.2294   3
   0  20   3 248.379 46.0355   3
   0  20  -3 202.520 44.9158   3
   0  20  -4 202.121 43.2023   3
   0  20   4 159.133 44.7821   3
   0  20  -5 81.5406 42.2328   3
   0  20   5 21.4782 43.5480   3
   0  20   6 15.3449 38.4796   3
   0  20  -6 6.25844 40.9015   3
   0  21   0 17.8645 38.2716   3
   0  21  -1 212.412 41.7459   3
   0  21   1 215.988 41.9183   3
   0  21  -2 49.6419 40.5298   3
   0  21   2 106.931 43.0183   3
   0  21   3 28.0447 44.4786   3
   0  21  -3 23.7991 40.6995   3
   0  21   4 101.082 47.2204   3
   0  21  -4 224.792 43.0823   3
   0  21  -5 41.1921 43.6240   3
   0  21   5 90.7873 43.5306   3
   0  22   0 319.439 45.1615   3
   0  22   1 16.8574 36.9881   3
   0  22  -1 31.3609 41.2154   3
   0  22   2 218.826 47.1507   3
   0  22  -2 241.123 42.6997   3
   0  22   3 14.3458 40.8113   3
   0  22  -3 12.4634 40.3954   3
   0  23   0-32.0179 37.9185   3
   1   0 -12 27.4863 66.8248   3
  -1   0  12 47.8693 48.2196   7
   1   0 -11-215.036 85.1973   3
  -1   0  11 13.0157 42.5994   7
  -1   0  10 45.2957 44.5433   7
  -1   0   9-1.28297 41.7743   7
  -1   0   8 506.371 56.3485   7
  -1   0   7-25.1045 43.3363   7
  -1   0   6 552.759 62.9171   7
  -1   0   5 1.08717 44.9372   7
  -1   0   4 9300.59 721.950   7
  -1   0   3 70.6259 33.8344   7
  -1   0   3 80.1148 32.5810   1
  -1   0   2 13295.6 1029.47   7
   1   0  -1-33.9597 10.6744   3
  -1   0   1 15.7325 18.4539   7
  -1   0   1-5.82282 20.9624   1
  -1   0   0 15991.5 1239.22   7
  -1   0   0 16040.9 1239.38   1
   1   0   1-6.93624 13.7115   5
   1   0   2 2383.24 184.930   6
   1   0   3-9.80003 26.4104   2
   1   0   3 7.89487 31.9718   7
   1   0   4 78.9956 28.4579   2
   1   0   4 60.7245 36.8683   7
   1   0   5 28.1341 40.8572   7
   1   0   5 16.1259 30.7030   2
   1   0   6 81.4686 44.3766   7
   1   0   6 89.8072 33.5497   2
   1   0   7 95.9413 47.1115   7
   1   0   7 20.0951 31.1637   2
   1   0   8 437.363 55.3803   7
   1   0   8 276.523 42.0768   2
   1   0   9 71.9393 32.7069   2
   1   0  10 127.285 33.5626   2
   1   0  11 0.46764 27.0208   2
  -1   0 -12-107.197 71.2433   3
  -1   1  12 169.961 46.7297   7
   1  -1 -12 13.1401 72.7031   3
  -1  -1  12 157.611 48.4143   7
   1   1 -12 12.1903 74.1493   3
   1  -1 -11-159.694 81.5481   3
   1   1 -11 11.1608 87.1375   3
  -1   1  11 17.3194 43.3235   7
  -1  -1  11-6.72547 43.9616   7
  -1   1  10-15.8829 41.7090   7
  -1  -1  10 1.17624 43.6960   7
  -1   1   9 112.689 43.3396   7
  -1  -1   9 130.392 42.8680   7
  -1   1   8 34.1975 44.1027   7
  -1  -1   8-1.97452 37.6013   7
  -1  -1   7 268.923 46.0238   7
  -1   1   7 288.702 50.8948   7
  -1   1   6 1855.90 142.101   7
  -1  -1   6 1593.09 139.966   7
  -1  -1   5 681.394 65.9669   7
  -1   1   5 556.005 68.4937   7
  -1  -1   4 4628.85 372.110   7
  -1   1   4 4893.00 371.788   7
  -1   1   3 14445.9 1107.46   1
  -1   1   3 14921.7 1107.59   7
  -1  -1   3 13400.9 1107.76   7
  -1   1   2 3060.36 234.085   1
  -1  -1   2 2949.24 233.954   7
  -1   1   2 3000.86 234.084   7
   1   1  -1 1745.76 138.580   3
  -1   1   1 1673.42 139.658   7
  -1  -1   1 1812.96 138.905   7
  -1  -1   1 1954.90 140.147   1
  -1  -1   0 32.8123 20.1715   1
   1   1   0 13.3248 9.59720   3
  -1   1   0 39.8030 21.4638   7
   1  -1   1 768.202 62.1565   2
   1   1   1 765.958 60.5451   3
   1   1   1 734.313 60.8605   5
   1   1   2 650.263 46.8153   7
   1   1   2 534.162 42.2824   6
   1   1   3 147.506 27.4619   2
   1   1   3 142.193 29.9928   7
   1   1   4 75.5900 27.4974   2
   1  -1   4 39.1675 29.9784   2
   1   1   4 96.6270 32.3663   7
   1   1   5-0.13683 35.5864   7
   1  -1   5 7.98132 12.6227   4
   1  -1   5-7.37811 32.5391   2
   1   1   5 11.0879 26.3541   2
   1   1   6 93.8289 28.0603   2
   1  -1   6 127.224 38.9773   2
   1   1   6 116.255 42.1237   7
   1   1   7-5.74189 41.3171   7
   1   1   7 22.8734 28.1310   2
   1   1   8 16.4858 47.7254   7
   1   1   8-5.01987 28.8220   2
   1  -1   8 18.7842 40.8767   2
   1   1   9 144.803 51.8570   7
   1  -1   9 72.1355 39.7542   2
   1   1   9 31.5026 27.8817   2
   1  -1  10 133.071 36.8873   2
   1   1  10 50.0604 26.0776   2
   1  -1  11 11.4401 31.1029   2
  -1   1 -11-78.0629 76.9033   3
  -1  -1 -12-125.695 77.0467   3
  -1   1 -12 37.0981 65.3438   3
  -1   2  12 56.7498 45.9619   7
   1   2 -12-46.3921 74.4610   3
   1  -2 -12-46.9060 69.5127   3
  -1  -2  12 29.5281 46.9637   7
   1   2 -11 115.921 89.2087   3
  -1   2  11 60.4570 44.5164   7
  -1  -2  11 5.76266 46.9709   7
   1   2 -10-65.4626 95.2809   3
  -1   2  10 11.7402 42.7939   7
  -1  -2  10 0.88784 44.0627   7
  -1   2   9 39.8133 41.5917   7
  -1  -2   9 22.0191 41.2021   7
  -1  -2   8 6.02525 39.2349   7
  -1   2   8-14.0896 46.3297   7
  -1  -2   7 432.755 54.3824   7
  -1   2   7 505.190 61.2140   7
  -1  -2   6 301.645 47.2099   7
  -1   2   6 353.013 56.3006   7
  -1  -2   5 3784.10 299.811   7
  -1   2   5 3882.24 301.559   7
  -1   2   4 2487.64 195.288   7
  -1   2   4 2254.19 193.620   1
  -1  -2   4 2742.58 195.077   7
  -1   2   3 4505.27 363.240   1
  -1  -2   3 5628.41 364.652   7
   1   2  -3 4509.27 364.743   3
  -1   2   3 4388.35 363.757   7
   1   2  -2 130.866 24.4586   3
  -1  -2   2 136.038 33.0806   7
  -1  -2   2 150.395 32.9026   1
  -1   2   1 768.770 58.9289   3
   1   2  -1 797.379 60.9819   3
  -1  -2   1 768.264 59.6321   7
  -1   2   1 613.554 60.8208   1
  -1   2   1 663.064 61.8330   7
  -1  -2   1 789.596 63.7270   1
   1   2   0 1305.42 86.4533   3
   1  -2   0 1102.75 87.8976   2
  -1   2   0 1102.75 89.1145   7
  -1  -2   0 1125.59 87.7973   1
  -1   2   0 999.555 85.9218   3
  -1  -2   0 1080.43 85.5277   7
  -1  -2  -1 1283.85 119.537   1
   1  -2   1 1543.24 119.899   2
  -1   2  -1 1744.75 119.107   3
   1   2   1 1459.28 119.231   3
   1   2   2 258.585 29.0168   2
   1   2   2 240.753 29.5724   3
  -1  -2  -2 261.387 22.3958   4
   1   2   2 274.813 30.6976   7
   1   2   2 300.668 28.7670   6
   1  -2   2 314.528 33.8710   2
   1  -2   3 96.7064 18.7069   4
   1   2   3 82.4802 25.2396   2
   1   2   3 117.152 30.5474   7
   1  -2   4 90.3173 32.6743   2
   1  -2   4 115.719 19.0332   4
   1   2   4 161.159 32.7384   7
   1   2   4 80.4775 25.1638   2
   1  -2   5 20.4200 17.8652   4
   1   2   5 25.4845 23.9126   2
   1  -2   5 36.1531 37.2496   2
   1   2   5 17.3108 35.5992   7
   1  -2   6 45.1124 18.5696   4
   1   2   6 60.3302 23.0306   2
   1  -2   6 109.694 39.9165   2
   1   2   6 54.5895 39.4709   7
   1   2   7 50.6218 40.8403   7
   1  -2   7-10.5611 46.6255   2
   1   2   7 52.2714 24.1415   2
   1   2   8 127.633 46.7108   7
   1  -2   8 214.469 46.2166   2
   1   2   8 99.0171 24.8797   2
   1  -2   9 43.4787 45.8194   2
   1   2   9 82.2607 50.5268   7
   1   2   9 56.1756 23.4336   2
  -1   2 -10 115.321 71.6078   3
   1  -2  10 150.492 44.2215   2
   1   2  10 60.4867 24.5638   2
  -1   2 -11 41.8275 72.6081   3
   1  -2  11 70.0834 37.1557   2
  -1   2 -12-2.09852 68.7298   3
  -1   3  12 101.631 47.5502   7
   1   3 -12 66.5421 78.5027   3
  -1   3  11 6.54593 42.9233   7
  -1  -3  11 1.03222 44.9797   7
   1   3 -10 45.6691 91.7276   3
  -1   3  10 31.0559 43.6998   7
  -1  -3  10 55.8818 42.4358   7
  -1  -3   9 169.100 45.2532   7
  -1   3   9 182.082 46.9635   7
   1   3  -9 302.162 77.6781   3
  -1   3   8-58.2359 50.8447   7
   1   3  -8-154.807 67.5125   3
   1   3  -8-14.2069 33.2816   5
  -1  -3   8 2.00455 39.4055   7
  -1  -3   7 574.595 62.7788   7
   1   3  -7 692.359 81.0613   3
  -1   3   7 645.597 71.2396   7
   1   3  -6 280.173 56.3189   3
  -1   3   6 367.427 58.8154   7
  -1  -3   6 338.583 44.3033   7
  -1  -3   5 828.872 74.3403   7
  -1   3   5 894.481 79.3587   7
   1   3  -5 767.694 81.7257   3
  -1   3   4 675.871 61.4892   1
  -1  -3   4 773.475 64.8411   7
   1   3  -4 636.307 67.3462   3
  -1   3   4 697.599 66.1214   7
  -1   3   3 1063.41 99.7124   7
  -1  -3   3 1346.55 105.372   1
  -1  -3   3 1487.19 101.194   7
  -1   3   3 1105.14 97.4077   1
   1   3  -3 1342.39 100.777   3
   1   3  -2 64.9504 30.0595   5
  -1  -3   2 92.6676 28.4367   7
   1   3  -2 76.8429 23.7641   3
  -1  -3   2 115.609 34.7879   1
  -1   3   2 90.0792 23.0457   3
  -1   3   2 115.850 29.5029   7
  -1   3   2 116.519 22.0987   1
  -1   3   1 4964.44 364.277   1
  -1   3   1 4938.19 364.737   7
  -1  -3   1 4160.62 365.147   1
   1   3  -1 4433.20 364.774   3
  -1  -3   1 4549.48 364.030   7
  -1   3   1 4866.71 364.093   3
  -1   3   0 118.247 26.9820   7
  -1  -3   0 52.7028 22.5358   1
  -1   3   0 74.2662 16.5449   3
   1   3   0 56.5450 19.5450   3
   1  -3   0 83.6295 22.2138   2
   1  -3   1 10068.0 768.133   2
   1   3   1 9835.77 767.675   7
  -1   3  -1 9745.32 768.409   7
   1   3   1 10068.0 767.969   3
  -1  -3  -1 10034.4 767.892   1
  -1   3  -1 9785.93 767.926   3
   1   3   2 652.499 57.9060   7
   1  -3   2 747.543 59.9797   2
   1   3   2 737.751 59.3675   3
   1   3   2 628.352 56.9843   2
   1   3   2 714.426 58.5544   6
  -1   3  -2 686.779 59.0966   3
  -1  -3  -2 709.915 55.4468   4
   1   3   3 306.115 33.1645   2
   1  -3   3 295.639 37.2916   2
   1   3   3 296.078 35.7395   3
   1  -3   3 315.228 30.9226   4
   1   3   3 290.107 36.3930   7
   1   3   4 165.845 32.6586   7
   1   3   4 159.247 26.5694   2
   1  -3   4 170.835 23.5264   4
   1  -3   5-9.44883 19.6516   4
   1   3   5 2.64307 20.5875   2
   1   3   5 3.73939 34.1659   7
   1  -3   5-13.9446 38.0931   2
   1   3   6 115.571 37.0827   7
   1  -3   6 117.388 22.4268   4
   1  -3   6 158.640 45.4063   2
   1   3   6 68.2004 20.5924   2
   1  -3   7 338.168 54.7657   2
   1   3   7 261.497 43.4254   7
   1   3   8 59.0702 43.4765   7
   1  -3   8 105.220 49.5711   2
   1   3   8 33.8124 20.0683   2
   1   3   9 486.524 52.3596   7
  -1   3  -9 273.098 69.8685   3
   1  -3   9 405.813 56.1802   2
   1   3  10-8.87388 51.3439   7
   1  -3  10 83.4786 46.9508   2
  -1   3 -11 191.338 69.6438   3
   1  -3  11 69.1612 40.3967   2
  -1   3 -12-23.9399 63.7516   3
   1  -3  12 25.5184 34.7931   2
   1   4 -12-68.9840 80.0584   3
   1   4 -11-135.133 95.1529   3
   1   4 -10-4.09394 81.5244   3
  -1   4  10 12.2017 46.6102   7
  -1  -4  10-28.5371 42.4093   7
   1   4  -9-33.2815 73.1978   3
  -1  -4   9-9.41861 42.5526   7
  -1   4   9 11.4324 44.7584   7
  -1   4   8 264.207 54.7144   7
  -1  -4   8 275.817 46.8567   7
   1   4  -8 207.271 35.7026   5
   1   4  -7 90.6916 52.1518   3
   1   4  -7 115.722 31.8112   5
  -1  -4   7 142.544 41.6141   7
  -1   4   7 164.353 53.1282   7
  -1  -4   6 575.190 59.4334   7
   1   4  -6 578.238 55.4626   5
   1   4  -6 642.100 67.2806   3
  -1   4   6 623.871 71.3462   7
   1   4  -5 196.178 32.6325   5
  -1  -4   5 122.109 38.7667   7
   1   4  -5 200.614 48.1506   3
  -1   4   5 96.6110 45.4046   7
  -1   4   4 293.491 35.9240   1
   1   4  -4 365.527 48.1468   3
  -1   4   4 340.520 43.2156   7
   1   4  -4 275.432 37.1499   5
  -1  -4   4 357.437 41.0771   7
  -1   4   3 796.892 64.5695   1
  -1   4   3 644.312 66.0274   3
   1   4  -3 887.499 68.3798   5
  -1   4   3 873.956 70.1394   7
  -1  -4   3 726.155 67.7154   7
   1   4  -3 877.281 68.0576   3
   1   4  -2 126.068 25.0439   3
  -1  -4   2 84.1489 39.0630   1
  -1  -4   2 74.7803 22.5143   7
  -1   4   2 88.5581 24.0778   3
  -1   4   2 114.869 20.9068   1
  -1   4   2 104.384 31.1517   7
   1   4  -2 147.170 28.8035   5
   1   4  -1 167.751 30.3868   3
  -1   4   1 131.747 23.7627   3
  -1   4   1 144.295 30.9343   7
  -1  -4   1 95.7922 29.8931   1
  -1   4   1 95.5560 23.7688   1
   1   4  -1 102.444 27.0035   5
  -1   4   0 1085.26 83.2308   7
  -1  -4   0 1149.38 82.1557   1
  -1   4   0 917.829 80.0786   3
   1   4   0 899.120 81.5960   3
   1  -4   0 1072.31 81.3207   2
  -1  -4  -1 630.753 55.7243   1
   1  -4   1 720.028 57.2145   2
  -1   4  -1 786.185 60.1297   7
   1   4   1 620.496 56.8620   3
   1   4   1 647.886 53.9560   7
  -1   4  -1 812.905 57.5620   3
  -1  -4  -2 8889.02 701.361   4
   1  -4   2 8995.34 701.619   4
   1   4   2 9510.08 701.880   3
   1   4   2 9231.10 701.490   7
   1  -4   2 8897.27 701.956   2
   1   4   2 9287.53 701.882   6
  -1   4  -2 8765.08 701.804   3
  -1  -4  -2 9003.93 701.521   1
   1  -4   3 2408.53 182.173   4
   1   4   3 2442.24 183.362   6
  -1   4  -3 2324.53 183.100   3
   1  -4   3 2225.74 183.205   2
   1   4   3 2256.13 182.728   7
   1   4   3 2314.08 181.864   2
   1  -4   4 27.5976 21.5862   4
   1   4   4 5.07366 22.0864   2
   1   4   4 64.6829 29.4760   7
   1   4   5 214.085 35.9763   7
   1   4   5 185.240 24.2319   2
   1  -4   5 137.821 25.1365   4
   1  -4   6 22.9769 23.3197   4
   1   4   6 22.1090 35.0245   7
   1  -4   6 11.3131 45.5706   2
   1   4   6-10.2933 18.7046   2
  -1   4  -7 55.7989 49.2047   3
   1   4   7 156.327 40.9364   7
   1  -4   7 255.955 27.6245   4
   1   4   7 88.1053 21.4789   2
   1  -4   7 228.962 51.1161   2
  -1   4  -8 490.190 55.6963   3
   1  -4   8 523.778 60.6467   2
   1   4   8 460.417 49.2679   7
   1  -4   9 63.9412 53.3054   2
  -1   4  -9-21.4330 52.2430   3
   1   4   9 12.7956 44.2265   7
   1  -4  10 80.9803 50.5378   2
  -1   4 -10 129.919 63.2895   3
   1   4  10 143.182 47.4526   7
   1  -4  11 53.0955 41.9552   2
  -1   4 -11 5.80751 67.1059   3
   1  -4  12-14.8054 36.6266   2
   1   5 -12 332.061 86.5556   3
   1   5 -11-5.85529 91.0216   3
   1   5 -10 106.029 85.6049   3
  -1  -5  10 8.98432 33.7332   4
  -1  -5   9 35.2918 41.4910   7
   1   5  -9-65.8638 71.4701   3
   1   5  -8 31.8666 56.6254   3
  -1  -5   8 69.8398 42.4370   7
   1   5  -8 64.9242 28.2906   5
   1   5  -7 64.6255 29.7196   5
   1   5  -7 85.1325 53.0115   3
  -1  -5   7 39.5628 38.6434   7
   1   5  -6 557.491 56.4255   5
  -1  -5   6 702.252 61.8381   7
   1   5  -6 625.976 69.0520   3
  -1  -5   5 187.126 39.8959   7
   1   5  -5 185.280 33.2960   5
   1   5  -5 174.164 46.8319   3
   1   5  -4 216.481 30.7429   5
  -1   5   4 52.3288 28.1846   3
   1   5  -4 167.166 41.2064   3
  -1  -5   4 101.659 34.2953   7
  -1   5   4 42.2578 25.2270   1
  -1   5   3 204.294 32.1343   3
  -1  -5   3 186.291 32.8692   7
   1   5  -3 157.077 32.8698   3
  -1   5   3 206.881 24.8431   1
   1   5  -3 191.657 32.8242   5
  -1  -5   2-8.64625 42.0599   1
  -1  -5   2 37.2845 25.6433   7
  -1   5   2 40.6530 24.6774   3
   1   5  -2 64.8712 25.7067   3
   1   5  -2 55.4931 28.3628   5
  -1   5   2 45.9878 18.4103   1
   1   5  -1 17.3338 33.0486   3
   1   5  -1 26.6472 25.6701   5
  -1   5   1 25.0754 24.9036   3
  -1   5   1 23.5105 29.7456   7
  -1  -5   1 31.7675 34.2259   1
  -1  -5   0 23.3833 26.0291   1
  -1   5   0 39.5860 32.8224   7
   1  -5   0 31.4249 22.9267   2
   1   5   0 18.6830 26.0753   3
  -1   5   0 19.8270 21.8717   3
   1   5   1 7946.57 630.610   7
  -1  -5  -1 7959.70 631.184   4
  -1  -5  -1 8048.02 630.931   1
   1  -5   1 8352.57 631.200   2
  -1   5  -1 8995.98 631.609   7
   1   5   1 8060.75 631.330   3
  -1   5  -1 8277.37 631.336   3
  -1  -5  -2 10707.7 842.717   1
   1  -5   2 10881.8 843.100   4
   1  -5   2 10938.8 843.253   2
  -1   5  -2 10806.4 843.108   3
   1   5   2 10656.4 843.227   3
  -1  -5  -2 11048.6 842.860   4
   1   5   2 11181.7 842.918   7
   1   5   2 10821.6 843.273   6
  -1   5  -3 253.564 37.9706   3
   1  -5   3 249.756 36.4974   2
   1  -5   3 246.968 30.8042   4
   1  -5   4 74.5551 24.3046   4
   1   5   4 97.6996 20.3268   2
   1   5   4 94.5591 30.4102   7
  -1   5  -4 31.3766 34.2952   3
   1  -5   4 108.253 35.7430   2
   1  -5   5 42.6257 24.1110   4
  -1   5  -5 13.9167 35.9408   3
   1   5   5 37.8206 20.8318   2
   1   5   5 59.3110 31.5546   7
  -1   5  -6 40.4710 39.0662   3
   1  -5   6 110.233 25.4114   4
   1   5   6 45.6779 19.4814   2
   1   5   6 110.475 33.3344   7
   1  -5   7 76.5864 51.7037   2
   1  -5   7 57.1434 27.6872   4
  -1   5  -7 1.26771 37.3105   3
   1   5   7 22.1331 17.5153   2
   1   5   7 41.8381 36.9486   7
   1   5   8 74.4631 38.9917   7
   1  -5   8 112.700 52.2166   2
  -1   5  -8 58.8238 42.6804   3
   1   5   9 128.022 42.2469   7
  -1   5  -9 11.9164 51.5480   3
   1  -5   9 113.783 54.6853   2
  -1   5 -10-68.5697 59.1851   3
   1   5  10 80.9475 47.4845   7
   1  -5  10-14.1098 49.4716   2
   1   5  11-17.2396 47.1753   7
  -1   5 -11-1.91407 63.3883   3
   1  -5  11-1.48411 44.5592   2
  -1   6  11-14.5717 43.0688   7
   1   6 -11-150.601 83.9841   3
   1   6 -10 270.663 84.2369   3
  -1  -6  10 160.619 36.2031   4
   1   6  -9-8.83392 63.2345   3
   1   6  -8 372.689 63.3159   3
  -1  -6   8 375.924 53.2116   7
   1   6  -7 168.315 32.5758   5
  -1  -6   7 129.433 43.9447   7
   1   6  -7 222.667 51.2620   3
   1   6  -6 320.280 40.0486   5
  -1  -6   6 327.879 45.4195   7
   1   6  -6 329.104 57.9945   3
   1   6  -5 156.398 32.6082   5
   1   6  -5 171.793 49.5737   3
  -1  -6   5 189.714 39.7729   7
  -1   6   4 5.38442 27.4350   3
  -1  -6   4 12.9861 34.5782   7
   1   6  -4 11.8283 30.4824   5
   1   6  -4 6.04294 37.6183   3
  -1   6   3 203.536 22.6737   1
  -1   6   3 141.236 32.1404   3
   1   6  -3 138.573 31.0371   3
   1   6  -3 169.516 33.1162   5
   1   6  -2 85.3013 28.3030   3
  -1   6   2 97.4034 18.1649   1
  -1   6   2 57.0091 27.9244   3
   1   6  -2 33.9505 29.2438   5
  -1   6   1 48.3881 25.7770   3
   1   6  -1 1.13793 12.4215   7
  -1  -6   1 37.4949 37.4216   1
   1   6  -1 96.3092 33.7942   3
   1   6   0 685.805 52.8942   7
  -1  -6   0 534.287 59.0789   1
   1  -6   0 814.706 57.3745   2
   1   6   0 719.584 60.8364   3
  -1   6   0 496.093 58.1725   3
  -1  -6  -1 3129.81 222.175   1
   1   6   1 2865.79 222.741   3
   1  -6   1 2456.48 222.716   2
  -1  -6  -2 4391.33 346.511   1
   1  -6   2 5005.28 347.802   2
  -1  -6  -2 4371.28 347.341   4
   1   6   2 4225.33 347.900   6
  -1   6  -2 4479.08 347.770   3
   1  -6   2 4993.11 347.838   4
   1   6   2 4175.38 347.109   7
   1   6   3 2139.78 167.429   7
  -1  -6  -3 2021.09 165.618   1
  -1   6  -3 2395.26 168.189   3
   1  -6   3 2115.94 168.289   2
   1   6   3 2259.72 169.345   6
   1  -6   3 2148.12 167.388   4
   1   6   4 320.926 35.1599   7
  -1  -6  -4 197.233 23.5271   1
   1  -6   4 210.401 32.9475   4
  -1   6  -4 173.900 39.8661   3
   1  -6   4 212.842 39.7874   2
   1  -6   5 44.2265 26.0292   4
  -1   6  -5 30.5476 36.4903   3
   1   6   5-21.5073 32.3353   7
   1  -6   5 21.0497 39.0328   2
   1   6   6 41.0370 33.4666   7
  -1   6  -6-28.2852 38.9184   3
   1   6   6 29.8236 15.3383   2
   1  -6   6 52.6976 26.2934   4
   1  -6   7-14.9267 28.0115   4
  -1   6  -7-32.6808 39.3161   3
   1   6   7 34.6260 33.1186   7
   1  -6   8 472.078 62.1530   2
   1   6   8 410.409 51.2289   7
  -1   6  -8 378.488 53.4037   3
  -1   6  -9-5.60306 51.7332   3
   1  -6   9-30.1737 52.3345   2
   1   6   9-38.8225 43.2576   7
   1   6  10 210.419 48.5310   7
   1  -6  10 245.575 56.0273   2
  -1   6 -10 249.375 65.4358   3
  -1   6 -11-21.1412 62.6653   3
   1   6  11 41.5826 45.6223   7
   1  -6  11 21.4486 42.9031   2
  -1   7  11 41.6070 43.7338   7
   1   7 -11 48.3479 79.3895   3
  -1   7  10-35.7576 46.1376   7
   1   7 -10-5.06222 70.7333   3
  -1  -7  10 14.7934 34.9843   4
   1   7  -9 276.530 65.2209   3
  -1   7   9 193.355 53.0611   7
  -1  -7   9 174.521 40.5360   4
   1   7  -8 10.7665 52.8173   3
  -1   7   8-5.59734 49.5519   7
  -1   7   7 1028.55 104.539   7
   1   7  -7 1354.77 105.258   3
   1   7  -7 1168.27 97.9461   5
   1   7  -6 725.136 64.9833   5
   1   7  -6 648.146 76.0712   3
   1   7  -5 53.3191 33.9651   5
   1   7  -5 72.5958 42.7480   3
   1   7  -4 140.149 34.0544   5
   1   7  -4 143.467 40.2680   3
  -1   7   4 115.059 33.7101   3
  -1   7   3-2.70261 30.8999   3
   1   7  -3 63.9549 30.1571   3
  -1   7   3 7.77956 16.3791   1
   1   7  -2 81.5971 30.8600   3
  -1   7   2 139.795 30.7012   3
  -1   7   2 153.811 19.8517   1
   1   7  -1 288.838 39.5367   3
   1   7  -1 233.895 25.8701   7
  -1   7   1 184.872 33.7192   3
  -1   7   0 158.798 31.1610   3
   1  -7   0 179.085 27.1670   2
  -1   7  -1 79.8246 32.6496   3
  -1  -7  -1 125.170 26.0623   1
   1  -7   1 207.991 29.3885   2
  -1  -7  -1 88.9505 29.5644   4
   1   7   1 228.755 20.5911   7
   1   7   1 116.271 33.9898   3
   1   7   2 5334.26 403.398   7
  -1   7  -2 4836.87 404.021   3
  -1  -7  -2 5328.31 402.894   1
   1  -7   2 4803.80 403.929   2
   1   7   2 5239.14 404.279   6
  -1  -7  -2 5766.12 403.750   4
   1  -7   2 4714.42 404.008   4
   1  -7   3 736.155 56.2677   4
   1  -7   3 668.941 57.4794   2
  -1   7  -3 711.147 55.8944   3
   1   7   3 598.700 55.2263   7
  -1  -7  -3 523.732 48.2331   1
   1   7   3 739.075 58.3446   6
   1  -7   4 197.961 47.2818   4
  -1   7  -4 149.487 51.5377   3
   1  -7   4 228.855 50.0059   2
   1   7   4 205.666 48.8665   7
  -1   7  -5 87.3074 38.3103   3
   1   7   5 127.899 34.9030   7
   1  -7   5 141.322 40.3154   2
   1  -7   5 81.7308 30.3288   4
   1  -7   6 477.988 51.9746   2
   1  -7   6 371.617 41.7725   4
   1   7   6 424.786 46.3778   7
  -1   7  -7 133.260 41.7450   3
   1   7   7 75.5208 37.0241   7
   1  -7   7 84.6611 30.5913   4
   1  -7   8 99.0486 47.7610   2
  -1   7  -8 78.8664 41.0633   3
   1   7   8 25.6341 38.6136   7
  -1   7  -9 78.0842 50.4688   3
   1   7   9 152.375 43.5708   7
   1  -7   9 149.157 52.2960   2
   1   7  10-5.16488 41.7492   7
  -1   7 -10-7.53436 55.3698   3
   1  -7  10 23.3817 51.1414   2
   1   7  11 47.1665 47.9613   7
  -1   7 -11 59.2134 58.1285   3
   1  -7  11 22.2910 43.9543   2
  -1   8  11 33.9028 44.5982   7
   1   8 -11 133.178 80.9883   3
   1   8 -10 43.7236 71.5803   3
  -1   8  10-23.0676 46.9810   7
  -1  -8  10 23.2199 37.4553   4
   1   8  -9 12.5986 58.8649   3
  -1   8   9 30.8581 49.0026   7
  -1  -8   9 4.40232 36.9919   4
   1   8  -8 131.924 49.9350   3
  -1  -8   8 32.3189 40.8552   4
  -1   8   8 38.1671 51.0939   7
  -1   8   7 338.322 55.4908   7
   1   8  -7 365.484 57.7058   3
   1   8  -6 161.546 51.4422   3
  -1   8   6 103.048 42.8654   7
  -1   8   5 148.102 35.4163   3
  -1   8   5 164.576 36.7989   7
  -1   8   4 18.7577 33.3852   7
  -1   8   4 44.2624 36.0252   3
   1   8  -3 53.0210 32.5299   3
  -1   8   3 68.4429 35.1329   7
  -1   8   3 62.9010 34.7997   3
  -1   8   3 56.4446 14.7672   1
   1   8  -2 30.8868 31.8944   3
  -1   8   2 10.5796 15.8792   1
  -1   8   2 42.3661 29.2000   3
  -1   8   2 68.0635 37.6508   7
   1   8  -1 62.4377 19.4030   7
  -1   8   1 71.1705 34.9223   7
  -1  -8   1 67.5100 31.8534   4
   1  -8  -1 51.9102 25.3314   2
  -1   8   1 37.2030 27.8303   3
   1   8  -1 99.0654 39.7280   3
  -1  -8   0 109.884 32.2753   4
   1   8   0 163.948 19.5183   7
   1   8   0 185.667 42.6354   3
  -1   8   0 142.461 32.6596   3
  -1   8   0 143.514 36.2385   7
   1  -8   0 203.826 28.3812   2
   1   8   0 223.618 37.0067   6
  -1   8  -1 660.587 62.9040   7
  -1  -8  -2 258.670 30.7336   1
   1  -8   2 393.575 39.9689   4
  -1  -8  -2 358.574 39.0866   4
  -1   8  -2 417.514 41.2609   3
   1  -8   2 338.348 37.9373   2
   1   8   2 343.875 36.5651   7
  -1   8  -2 301.553 43.5842   7
   1   8   2 263.365 45.0160   6
   1  -8   3 4069.15 303.553   2
   1  -8   3 4024.85 303.598   4
   1   8   3 3785.32 303.038   7
  -1   8  -3 4135.89 303.509   3
   1   8   3 3302.57 304.458   6
  -1   8  -4 71.3569 37.6988   3
   1  -8   4 18.6212 32.4563   4
   1  -8   4 12.1490 36.2464   2
   1   8   4 36.3659 32.4408   7
   1   8   5 719.486 72.2698   7
   1  -8   5 830.889 71.2070   4
  -1   8  -5 840.635 73.7916   3
   1  -8   5 856.632 73.3640   2
   1  -8   6 46.8961 38.9678   2
   1   8   6-22.7177 34.0744   7
   1  -8   6 22.4534 28.5721   4
  -1   8  -6 19.5523 38.9535   3
   1   8   7 422.371 49.5291   7
  -1   8  -7 325.722 49.7783   3
   1  -8   7 424.501 54.3289   2
   1  -8   7 443.597 44.1037   4
  -1   8  -8 19.9636 39.9672   3
   1   8   8 118.719 38.1822   7
   1  -8   9-6.37517 48.7386   2
  -1   8  -9 47.7813 47.0330   3
   1   8   9-60.5466 39.3675   7
   1  -8  10 47.2867 48.0332   2
   1   8  10 36.0355 45.3745   7
  -1   8 -10 4.84266 54.8182   3
  -1   8 -11 19.7555 57.1792   3
   1   8  11 79.6081 43.8222   7
   1  -8  11 1.13556 43.0330   2
  -1   9  11 55.4912 43.4568   7
   1   9 -11 208.816 82.9235   3
  -1  -9  10 38.4715 37.9771   4
  -1   9  10 81.1956 46.0132   7
   1   9 -10 69.4129 67.8969   3
   1   9  -9 391.993 64.8633   3
  -1  -9   9 360.653 48.0462   4
  -1   9   9 327.709 55.3254   7
   1   9  -8-15.9667 54.1756   3
  -1   9   8 5.40120 50.0348   7
  -1  -9   8 107.037 43.0738   4
  -1  -9   7 953.863 86.9921   4
   1   9  -7 1064.65 91.6966   3
  -1   9   7 876.531 89.4467   7
  -1   9   6 178.094 41.5283   7
   1   9  -6 129.910 50.3296   3
   1   9  -5 141.117 49.9827   3
  -1   9   5 24.5328 34.3310   7
  -1   9   5 66.8392 34.8934   3
  -1   9   4 111.243 39.0085   7
   1   9  -4 176.603 40.8437   3
  -1   9   4 140.435 37.8954   3
   1   9  -3 190.455 36.7716   3
  -1   9   3 215.417 38.3823   3
  -1   9   3 185.382 40.9624   7
  -1   9   3 154.329 16.7246   1
   1   9  -2 52.1589 31.6455   3
  -1  -9   2 31.5065 35.3008   4
  -1   9   2 26.4264 39.0547   7
  -1   9   2 22.2263 30.4315   3
   1   9  -2 27.1040 15.5634   7
  -1   9   2 14.0970 15.7000   1
   1   9  -1 119.881 34.7631   6
  -1  -9   1 11.8061 31.1824   4
   1  -9  -1 88.4693 24.8938   2
  -1   9   1 21.5215 30.8526   3
   1   9  -1 58.4736 21.0968   7
  -1   9   1 46.9583 36.1455   7
   1   9  -1 73.4132 39.7579   3
  -1  -9   0 53.9421 30.6601   4
  -1   9   0 85.1371 34.3869   7
   1  -9   0 96.5481 24.7471   2
   1   9   0 48.4978 34.1246   6
   1   9   0 45.7275 17.0460   7
  -1   9   0 34.4878 32.2605   3
  -1  -9  -1 505.550 50.5356   4
   1  -9   1 678.816 48.0323   2
  -1   9  -1 677.023 55.6832   7
  -1   9  -1 637.222 51.7526   3
   1   9   2 304.133 35.3539   7
  -1   9  -3 444.217 57.4725   7
   1   9   3 487.793 54.0127   7
  -1   9  -3 568.362 55.2499   3
   1  -9   3 616.307 55.0546   2
   1  -9   3 654.519 57.3134   4
   1  -9   4 1011.30 85.9174   4
  -1   9  -4 1064.27 87.6470   3
   1   9   4 963.380 85.3041   7
   1  -9   4 970.301 86.7020   2
  -1   9  -5 87.2684 40.4976   3
   1  -9   5 109.484 34.1216   4
   1  -9   5 40.3691 35.8798   2
   1   9   5 81.9439 36.8092   7
  -1   9  -6 262.466 45.0356   3
   1  -9   6 329.008 39.8539   4
   1  -9   6 362.288 47.7170   2
   1   9   6 295.188 42.3987   7
   1   9   7 403.851 47.9420   7
  -1   9  -7 271.603 46.4504   3
   1  -9   7 430.264 51.5606   2
   1  -9   7 389.699 41.9049   4
   1   9   8 22.8563 37.4216   7
   1  -9   8 99.8577 30.9782   4
  -1   9  -8 3.08224 39.6010   3
   1   9   9 378.432 52.3445   7
  -1   9  -9 381.697 56.0048   3
   1   9  10-11.2904 43.2930   7
   1  -9  10 4.41674 48.5810   2
  -1   9 -10 30.3802 49.0270   3
  -1   9 -11 88.9452 56.7939   3
   1  -9  11 15.5936 43.2518   2
   1   9  11 32.0825 41.5928   7
   1  10 -11 22.8531 78.3074   3
  -1  10  11 25.3179 44.2648   7
  -1 -10  10 110.484 37.7357   4
  -1  10  10 76.4177 49.5367   7
   1  10  -9 60.0824 60.1094   3
  -1  10   9 27.3408 50.8281   7
  -1 -10   9 24.1286 38.4899   4
   1  10  -8 1095.90 89.9703   3
  -1  10   8 823.901 85.7115   7
  -1 -10   8 849.033 83.5637   4
   1  10  -7 127.496 50.9482   3
  -1 -10   7 134.343 44.2793   4
  -1  10   7 62.8330 52.6293   7
   1  10  -6 224.212 52.2551   3
  -1 -10   6 165.301 48.9640   4
  -1  10   6 119.262 44.5288   7
  -1 -10   5 245.257 46.6842   4
  -1  10   5 162.063 41.1238   7
  -1  10   5 142.936 40.4920   3
   1  10  -4 103.992 39.0460   3
  -1  10   4 16.3135 39.2278   3
  -1  10   4-4.24835 34.8330   7
  -1 -10   3 186.580 40.7173   4
  -1  10   3 176.383 38.9387   3
  -1  10   3 140.650 42.6522   7
   1  10  -3 106.269 35.7736   3
   1  10  -2 231.253 37.7436   6
  -1  10   2 268.421 23.1451   1
  -1  10   2 329.706 44.0786   7
  -1 -10   2 238.511 38.1148   4
   1  10  -2 120.336 24.2187   7
  -1  10   2 295.720 37.5966   3
   1  10  -2 180.672 38.1075   3
   1  10  -1 90.2396 35.5953   6
   1  10  -1 141.260 39.0584   3
  -1 -10   1 137.954 33.5586   4
   1 -10  -1 101.967 24.0747   2
  -1  10   1 131.341 38.9125   7
  -1  10   1 69.6723 29.7293   3
   1  10  -1 119.710 23.4890   7
   1 -10   0 866.629 62.8571   2
  -1  10   0 783.207 67.3111   3
   1  10   0 751.842 68.3371   6
  -1 -10   0 634.177 66.0099   4
  -1  10   0 783.758 68.2428   7
   1  10   0 672.450 60.1141   7
   1  10   1 241.661 42.4225   6
   1  10   1 123.690 24.9557   7
  -1  10  -1 300.786 43.4384   7
  -1 -10  -1 261.861 35.5115   4
   1 -10   1 257.128 31.9870   2
  -1  10  -1 257.830 38.2385   3
   1 -10   2 1461.46 110.332   4
  -1 -10  -2 1220.14 108.891   4
  -1  10  -2 1256.90 110.201   7
   1 -10   2 1383.04 107.286   2
  -1  10  -2 1241.83 109.023   3
   1  10   2 1321.61 105.687   7
   1 -10   3 1752.65 132.808   4
   1  10   3 1763.08 131.125   7
  -1  10  -3 1317.40 131.819   7
   1 -10   3 1637.24 132.268   2
  -1  10  -3 1688.30 132.892   3
   1 -10   4 100.997 34.0031   4
   1 -10   4 66.0941 36.8724   2
  -1  10  -4 126.169 38.8848   3
   1  10   4-0.76007 35.5550   7
   1 -10   5 107.702 37.7571   2
   1  10   5 117.630 38.7085   7
  -1  10  -5 184.280 38.8259   3
   1 -10   5 80.7234 33.9946   4
  -1  10  -6 326.766 47.2053   3
   1 -10   6 323.560 42.0307   4
   1 -10   6 300.525 48.7024   2
   1  10   6 287.058 44.4834   7
  -1  10  -7 48.4084 38.1984   3
   1 -10   7 49.6624 32.3276   4
   1  10   7 28.1695 37.0082   7
   1 -10   7 34.1609 40.9219   2
   1 -10   8 558.527 53.4403   4
  -1  10  -8 507.965 58.5212   3
   1 -10   8 517.479 63.0640   2
   1  10   8 518.229 57.4629   7
  -1  10  -9 55.6941 43.7012   3
   1  10   9 67.9999 42.5963   7
   1  10  10 112.817 43.0662   7
  -1  10 -10 59.7564 50.2132   3
   1 -10  10 27.8955 46.6701   2
   1  11 -10 91.9574 68.8589   3
  -1  11  10-14.3932 48.5719   7
  -1 -11  10-24.7434 36.8209   4
   1  11  -9 105.205 58.2096   3
  -1  11   9 11.3545 48.3645   7
  -1 -11   9 33.3744 39.0855   4
   1  11  -8 135.183 52.4421   3
  -1 -11   8 5.05478 41.9794   4
  -1  11   8 46.1447 50.8999   7
   1  11  -7 306.330 55.2868   3
  -1 -11   7 229.491 50.1745   4
  -1  11   7 157.905 51.5027   7
   1  11  -6 451.843 60.1328   3
  -1  11   6 393.651 49.1669   7
  -1 -11   6 396.939 53.5788   4
  -1  11   6 275.802 46.2470   3
   1  11  -5 262.208 49.8861   3
  -1 -11   5 199.477 48.3102   4
  -1  11   5 114.830 41.0037   7
  -1  11   5 180.614 41.9269   3
   1  11  -4 458.563 49.7431   6
   1  11  -4 449.127 49.0090   3
  -1  11   4 327.970 47.3653   3
   1  11  -3-2.27892 34.6428   3
  -1  11   3 30.3739 40.9590   7
   1  11  -3-16.9734 17.8706   7
  -1 -11   3 44.9675 36.3166   4
   1  11  -3 45.3769 34.9003   6
  -1  11   3-2.85469 35.3553   3
   1  11  -2 106.737 23.3109   7
  -1  11   2 220.118 35.8023   3
  -1 -11   2 133.788 37.0026   4
   1  11  -2 166.135 35.8867   6
  -1  11   2 164.514 18.3453   1
  -1  11   2 163.999 41.7458   7
   1  11  -2 116.238 36.3603   3
   1  11  -1 454.137 50.1483   6
  -1  11   1 421.878 46.5736   3
  -1 -11   1 364.952 48.2550   4
   1 -11  -1 478.621 40.6678   2
  -1  11   1 530.624 54.5046   7
   1  11  -1 415.671 41.0234   7
  -1  11   0 120.374 40.2566   7
  -1 -11   0 85.1688 33.8787   4
  -1  11   0 117.244 37.1542   3
   1 -11   0 71.1051 26.6119   2
   1  11   0 79.1299 20.1827   7
   1  11   0 111.073 37.8690   6
   1  11   1 185.550 26.1549   7
   1  11   1 223.518 41.9357   6
  -1 -11  -1 205.172 38.5431   4
  -1  11  -1 224.233 40.4889   3
   1 -11   1 218.977 31.3450   2
  -1  11  -1 258.966 44.5761   7
   1  11   2 729.213 65.3134   7
   1 -11   2 791.287 68.7104   2
  -1  11  -2 736.650 70.2342   7
  -1  11  -2 807.925 70.4415   3
   1 -11   3 26.7222 33.9594   2
  -1  11  -3 29.5432 38.3676   3
   1  11   3 26.6185 34.3385   7
   1 -11   3 30.7000 37.3049   4
  -1  11  -3 5.65840 35.8099   7
   1 -11   4 1290.78 100.393   4
   1  11   4 1277.29 99.7365   7
  -1  11  -4 1182.35 99.8170   3
   1 -11   4 1202.25 99.6878   2
  -1  11  -4 984.544 99.3749   7
  -1  11  -5 107.385 40.1659   3
   1 -11   5 83.8633 36.8571   4
   1 -11   5 40.2875 38.1407   2
   1  11   5 27.5395 38.8772   7
   1 -11   6 238.962 39.4934   4
  -1  11  -6 349.478 47.2635   3
   1  11   6 262.443 43.4476   7
   1 -11   6 287.181 46.0550   2
   1 -11   7 55.2166 40.5630   2
   1 -11   7 14.2308 34.5575   4
   1  11   7-5.50786 37.0450   7
  -1  11  -7 45.7235 37.8675   3
  -1  11  -8 93.6521 43.3831   3
   1  11   8 21.1082 38.9180   7
   1 -11   8-4.08133 45.9110   2
   1 -11   9 23.2144 44.7070   2
   1  11   9-12.7836 42.1417   7
  -1  11  -9 23.9156 44.5457   3
  -1  11 -10 37.6507 49.9488   3
   1  12 -10 126.468 62.0758   3
  -1  12  10 20.5890 49.6233   7
  -1 -12  10 70.7263 39.7309   4
   1  12  -9 75.0379 57.6763   3
  -1  12   9-16.5089 49.6894   7
  -1 -12   9-9.20270 40.5491   4
  -1 -12   8 682.816 76.0922   4
  -1  12   8 853.026 84.3915   7
   1  12  -8 972.861 86.2468   3
   1  12  -7 40.6630 55.3358   3
  -1  12   7 70.4822 48.8521   7
  -1 -12   7 63.0952 45.8902   4
   1  12  -6 227.751 48.3584   6
  -1 -12   6 312.224 52.0758   4
  -1  12   6 232.754 44.7703   3
   1  12  -6 351.682 56.9048   3
  -1  12   6 299.195 46.8665   7
   1  12  -5 158.124 47.3988   3
  -1  12   5 132.844 41.8817   3
  -1 -12   5 133.850 43.7287   4
  -1  12   5 126.521 41.8219   7
   1  12  -5 125.321 43.4930   6
   1  12  -4 300.755 42.6196   3
   1  12  -4 237.344 41.2978   6
  -1  12   4 243.746 43.8102   7
  -1  12   4 245.697 41.7641   3
   1  12  -4 130.365 26.0046   7
   1  12  -3 126.031 35.2648   6
   1  12  -3 119.674 35.4746   3
   1  12  -3 72.4978 20.5505   7
  -1  12   3 113.797 36.2033   3
  -1 -12   3 121.694 39.5362   4
  -1  12   3 119.527 44.3429   7
   1  12  -2 36.8797 33.6221   3
  -1 -12   2 85.2543 33.9378   4
  -1  12   2 69.8857 40.2414   7
   1  12  -2 84.9223 34.9285   6
  -1  12   2 33.0372 33.6143   3
   1  12  -2 101.863 21.4223   7
  -1  12   1 246.766 37.4169   3
   1  12  -1 304.589 42.4915   6
  -1 -12   1 243.685 38.7057   4
  -1  12   1 293.090 47.0568   7
   1  12  -1 242.340 29.5927   7
  -1 -12   0 406.399 53.9839   4
  -1  12   0 497.506 58.7982   7
   1 -12   0 604.618 49.5238   2
   1  12   0 558.935 46.6895   7
   1  12   0 578.585 57.6442   6
  -1  12   0 511.892 57.1595   3
  -1  12  -1 28.7946 39.0251   3
  -1 -12  -1 35.9725 38.0945   4
  -1  12  -1 23.9636 40.2980   7
   1  12   1-0.84734 20.7173   7
   1 -12   1 43.9808 27.1411   2
   1  12   1 47.1121 43.1005   6
   1  12   2 345.603 41.5322   7
  -1 -12  -2 386.514 50.3076   4
  -1  12  -2 430.329 52.2225   7
   1 -12   2 416.266 45.6583   2
  -1  12  -2 373.111 47.7652   3
   1 -12   3 202.428 41.4564   2
   1  12   3 200.381 39.9255   7
   1 -12   3 207.840 46.5654   4
  -1  12  -3 199.230 42.4155   7
  -1  12  -3 217.194 41.3525   3
   1 -12   4 24.4104 37.9255   4
   1  12   4 11.4291 38.5390   7
   1 -12   4-22.4344 39.0727   2
  -1  12  -4 77.2677 38.3494   3
  -1  12  -4 6.27447 33.8900   7
   1 -12   5 116.278 39.1547   2
  -1  12  -5 138.469 41.7914   3
   1 -12   5 126.532 39.2634   4
   1  12   5 129.497 41.6031   7
  -1  12  -5 64.2582 35.4503   7
   1 -12   6 92.6158 41.9870   2
  -1  12  -6 155.795 42.6312   3
   1 -12   6 158.488 38.2530   4
  -1  12  -6 30.5353 41.5532   7
   1  12   6 98.2626 39.1635   7
   1 -12   7-23.7482 42.2223   2
  -1  12  -7 85.4757 40.2147   3
   1 -12   7-5.04588 34.7428   4
   1  12   7 76.9240 38.2529   7
   1 -12   8 188.871 47.2561   2
  -1  12  -8 198.741 46.4713   3
   1  12   8 105.703 40.6488   7
  -1  12  -9 125.505 48.2011   3
   1 -12   9 65.5212 47.1622   2
  -1  12 -10 147.809 48.5811   3
   1 -12  10 86.6370 48.8253   2
   1  13 -10 119.298 60.9693   3
  -1 -13  10 24.9084 40.9291   4
  -1  13  10 26.1787 50.1490   7
  -1 -13   9 185.550 46.5372   4
   1  13  -9 314.382 62.5862   3
  -1  13   9 191.157 55.9891   7
   1  13  -8 58.5408 53.9668   3
  -1 -13   8 50.8257 43.4848   4
  -1  13   8 54.3211 54.3225   7
   1  13  -7 308.366 57.1875   3
  -1  13   7 241.693 58.9143   7
  -1 -13   7 284.404 50.8968   4
   1  13  -6 223.672 47.3276   6
   1  13  -6 384.842 53.4703   3
  -1 -13   6 314.852 52.6079   4
  -1  13   6 200.534 44.7027   3
  -1  13   6 240.483 50.0252   7
   1  13  -5 102.082 44.8899   3
  -1  13   5 79.0834 37.4786   3
  -1 -13   5 12.2281 42.3192   4
  -1  13   5 83.7483 41.4669   7
   1  13  -5 24.9634 44.1343   6
   1  13  -5-0.25306 23.3769   7
   1  13  -4 36.6307 40.9595   6
   1  13  -4 35.9406 20.5685   7
  -1  13   4 13.0828 37.7077   3
  -1  13   4 83.6838 42.4463   7
   1  13  -4 67.4944 38.7277   3
   1  13  -3 224.403 38.0214   6
   1  13  -3 131.661 37.3236   3
  -1 -13   3 145.019 38.0398   4
  -1  13   3 133.485 36.7676   3
   1  13  -3 121.166 22.7765   7
  -1  13   3 178.248 45.2589   7
  -1 -13   2 134.133 37.1337   4
   1  13  -2 119.939 39.7878   6
   1  13  -2 120.470 23.0347   7
  -1  13   2 143.250 35.5715   3
  -1  13   2 147.298 45.2503   7
  -1  13   1 833.192 71.3330   3
  -1 -13   1 699.469 69.9744   4
   1  13  -1 783.044 64.3653   7
  -1  13   1 841.834 73.0185   7
   1  13  -1 763.957 71.1252   6
   1 -13   0 66.5580 26.9955   2
  -1 -13   0 140.873 34.6673   4
   1  13   0 186.009 38.8586   6
  -1  13   0 112.140 39.8265   3
   1  13   0 131.494 21.6612   7
  -1  13   0 115.807 36.4170   7
  -1  13  -1 1017.99 90.3191   7
  -1 -13  -1 1097.47 90.6464   4
   1  13   1 926.973 91.6770   6
   1 -13   1 1041.59 85.9255   2
  -1  13  -1 1171.38 90.7172   3
   1  13   1 1029.03 84.0575   7
  -1  13  -2 177.023 42.0572   7
   1  13   2 136.664 30.7555   7
  -1 -13  -2 184.927 44.3018   4
   1 -13   2 160.233 34.3080   2
  -1  13  -2 131.202 36.7315   3
   1  13   3 211.702 41.5730   7
  -1  13  -3 190.677 40.4460   7
   1 -13   3 178.559 40.2374   2
  -1  13  -3 195.031 39.4063   3
  -1  13  -4 76.4658 36.5437   3
   1 -13   4 93.6782 43.8215   4
  -1  13  -4 6.20269 36.5041   7
   1 -13   4 67.0854 40.0121   2
   1  13   4 23.2863 38.5818   7
   1 -13   5 17.2163 41.4980   2
  -1  13  -5 17.7277 38.8763   3
  -1  13  -5 22.2869 35.0372   7
   1 -13   5-32.5680 38.5642   4
   1  13   5-6.57912 41.1386   7
  -1  13  -6 49.9498 42.6629   3
   1 -13   6-15.0940 39.4734   4
  -1  13  -6-20.0787 38.7833   7
   1  13   6-44.7824 35.9825   3
   1  13   6 21.3579 38.1670   7
   1 -13   6 59.7519 42.1430   2
   1  13   7 86.5781 39.2911   7
  -1  13  -7 125.127 42.7665   3
  -1  13  -7 48.9049 44.8098   7
   1 -13   7 109.223 44.5435   2
   1 -13   8 52.0368 46.4087   2
  -1  13  -8 29.6012 41.8296   3
  -1  13  -8-67.2043 51.2383   7
  -1  13  -9 287.135 48.2954   3
  -1  13  -9 170.188 59.4020   7
   1 -13   9 224.939 52.5722   2
  -1 -14   9 26.4538 44.4163   4
   1  14  -9 17.4932 53.6140   3
  -1  14   9 43.6970 54.9906   7
   1  14  -8-62.1281 55.4851   3
  -1  14   8-55.7707 55.6871   7
  -1 -14   8 7.49308 44.0594   4
  -1 -14   7 245.631 48.5515   4
  -1  14   7 278.012 61.2856   7
   1  14  -7 241.161 57.0744   3
  -1 -14   6-10.1664 46.5845   4
  -1  14   6-69.1439 35.7908   3
   1  14  -6-36.6629 51.2836   3
  -1  14   6 17.6564 49.3114   7
   1  14  -6-17.3597 25.0114   7
   1  14  -6 7.17840 39.4386   6
   1  14  -5 746.904 61.7087   3
  -1  14   5 656.513 61.6278   3
  -1  14   5 782.020 62.1012   7
   1  14  -5 676.397 64.0214   6
   1  14  -4-23.4613 40.7257   6
  -1  14   4 17.9163 38.3215   3
   1  14  -4-0.22023 21.6312   7
  -1  14   4 25.7610 44.1002   7
   1  14  -4-51.8767 35.6570   3
   1  14  -3 12.5825 40.4069   6
  -1 -14   3 52.7113 38.8708   4
  -1  14   3 119.290 43.9068   7
  -1  14   3 50.3657 35.4697   3
   1  14  -3 24.6302 20.1701   7
   1  14  -3 4.97694 35.9151   3
  -1 -14   2 20.5064 36.2359   4
   1  14  -2 88.7077 36.2525   6
  -1  14   2 102.224 32.1543   3
  -1  14   2 44.7222 41.3047   7
   1  14  -2 45.6089 20.1552   7
  -1 -14   1 190.939 36.5163   4
  -1  14   1 193.513 40.5564   7
  -1  14   1 166.653 40.4100   3
   1  14  -1 186.659 40.7246   6
  -1  14   0 55.9536 37.8651   7
  -1 -14   0 46.9777 36.9622   4
  -1  14   0 79.1310 39.7142   3
   1  14   0 68.5859 39.2059   6
  -1 -14  -1 261.294 47.4074   4
   1 -14   1 198.272 31.9270   2
  -1  14  -1 236.298 40.5274   7
  -1  14  -1 255.651 42.2755   3
   1  14   1 213.171 47.6802   6
  -1  14  -2 8.46649 35.1588   7
  -1  14  -2 36.1878 35.4988   3
   1 -14   2 35.3108 29.7210   2
   1 -14   3 763.618 70.7191   2
  -1  14  -3 761.232 70.5801   3
  -1  14  -3 777.995 72.5248   7
  -1  14  -4 46.1884 39.1605   3
  -1  14  -4 45.6601 38.8180   7
   1 -14   4 15.4218 40.0592   2
  -1  14  -5 194.558 40.7847   3
   1 -14   5 96.5030 43.4595   2
  -1  14  -5 95.5311 40.5998   7
   1 -14   6 63.8937 42.9332   2
  -1  14  -6 65.1327 40.9406   3
   1  14   6-2.85353 35.6643   3
  -1  14  -6 74.4509 42.1124   7
   1 -14   7 175.113 46.1994   2
  -1  14  -7 139.635 46.5688   3
  -1  14  -7 104.522 45.8061   7
  -1  14  -8 72.2551 46.0071   3
  -1  14  -8 5.69197 49.1286   7
   1 -14   8 63.4232 47.3216   2
  -1  14  -9 60.1737 47.0244   3
  -1  14  -9 17.8280 52.2816   7
   1 -14   9 38.7094 48.0006   2
   1  15  -9 261.595 58.4035   3
  -1 -15   9 208.117 46.5799   4
  -1  15   9 226.651 56.6486   7
   1  15  -8-2.96320 53.4459   3
  -1  15   8 14.4045 54.8256   7
  -1 -15   8 28.2270 46.6684   4
  -1 -15   7 345.022 56.7918   4
   1  15  -7 406.348 60.7286   3
  -1  15   7 368.749 65.5389   7
  -1 -15   6 204.502 50.5403   4
  -1  15   6 117.760 41.1727   3
  -1  15   6 132.941 53.0616   7
   1  15  -6 178.965 52.8197   3
   1  15  -5 22.0609 45.2886   6
   1  15  -5 55.2442 45.4333   3
  -1  15   5 34.1234 42.5741   7
  -1  15   5 38.4341 40.8104   3
   1  15  -4 210.704 44.4036   6
  -1 -15   4 229.607 45.4851   4
  -1  15   4 182.543 41.7827   3
   1  15  -4 261.488 41.4645   3
  -1  15   4 196.523 47.5395   7
   1  15  -3 105.021 41.0493   6
  -1 -15   3 29.2046 40.4857   4
  -1  15   3 47.8079 42.2408   7
  -1  15   3 19.3412 32.9324   3
   1  15  -3-28.3868 36.5003   3
  -1 -15   2 366.009 52.4566   4
  -1  15   2 430.972 50.0346   3
  -1  15   2 538.082 56.9964   7
   1  15  -2 586.330 56.1455   6
  -1 -15   1 735.401 72.8374   4
  -1  15   1 833.506 74.7661   7
  -1  15   1 839.449 73.8319   3
   1  15  -1 871.824 75.8121   6
  -1 -15   0 59.7755 41.6537   4
   1  15   0 55.1462 43.6230   6
  -1  15   0 14.9099 40.4012   3
  -1  15   0 17.0947 33.4041   7
   1 -15   1 626.837 48.1883   2
  -1 -15  -1 457.522 59.6111   4
  -1  15  -1 394.293 53.7473   7
  -1  15  -1 542.099 58.4109   3
   1  15   1 456.465 62.5247   6
  -1  15  -2 59.7694 36.1738   3
  -1  15  -2 76.4652 36.0145   7
   1 -15   2 113.852 28.7566   2
  -1  15  -3 62.8235 36.9115   7
   1 -15   3 85.5158 30.8583   2
  -1  15  -3 68.7298 39.6975   3
  -1  15  -4 110.884 39.1528   7
   1 -15   4 164.343 41.2915   2
  -1  15  -4 116.734 36.7649   3
  -1  15  -5 20.2122 41.2409   3
  -1  15  -5 17.6317 38.4253   7
   1 -15   5 22.2616 42.6117   2
   1  15   6 64.3821 37.4378   3
  -1  15  -6 0.80482 40.9493   3
   1 -15   6 49.0961 42.5140   2
  -1  15  -6 33.6159 41.2465   7
  -1  15  -7 66.0371 41.7062   3
  -1  15  -7 5.83213 44.1744   7
   1 -15   7 2.59447 44.9109   2
  -1  15  -8 72.8595 42.2852   3
  -1  15  -8 19.2556 46.9403   7
   1 -15   8 119.719 48.9957   2
  -1  15  -9 124.222 44.2668   3
  -1  15  -9 102.678 47.7893   7
   1 -15   9 32.5430 46.6547   2
   1  16  -8 324.198 56.9628   3
  -1 -16   8 386.239 54.7218   4
  -1  16   8 263.093 60.9846   7
  -1 -16   7 97.1842 52.1317   4
  -1  16   7 130.840 55.3909   7
   1  16  -7 1.06752 48.5282   3
  -1  16   6 105.389 40.1661   3
  -1 -16   6 144.120 52.7118   4
  -1  16   6 150.201 51.7826   7
   1  16  -6 79.3184 49.2916   3
   1  16  -5 68.9567 47.8986   3
  -1  16   5 71.9491 41.3146   3
  -1  16   5 4.19268 44.8433   7
   1  16  -5 96.5735 48.1610   6
  -1  16   4 91.9358 40.7766   7
  -1 -16   4 26.0801 44.5950   4
  -1  16   4 74.6824 37.5342   3
   1  16  -4 46.7216 37.6859   3
   1  16  -4 35.6902 48.5349   6
  -1 -16   3 136.922 42.5275   4
  -1  16   3 100.131 38.4877   3
  -1  16   3 92.9055 41.8726   7
   1  16  -3 107.560 46.4175   6
  -1 -16   2 410.674 53.6126   4
   1  16  -2 567.465 59.3007   6
  -1  16   2 464.976 51.7513   3
  -1  16   2 500.751 55.8498   7
  -1  16   1 290.577 43.7723   7
  -1  16   1 300.073 47.3403   3
  -1 -16   1 180.207 44.0220   4
   1  16  -1 294.729 46.4675   6
  -1 -16   0 598.992 64.7747   4
  -1  16   0 643.173 64.8714   3
  -1  16   0 595.068 60.8065   7
   1  16   0 704.043 66.7355   6
  -1 -16  -1 33.6235 49.1163   4
  -1  16  -1-14.4919 38.3130   3
  -1  16  -1-7.55213 33.4234   7
  -1  16  -2 295.534 43.0134   3
   1 -16   2 202.518 32.8894   2
  -1  16  -2 281.490 40.6479   7
  -1  16  -3-31.6746 36.5377   7
   1 -16   3 24.0598 30.2295   2
  -1  16  -3 19.0112 39.3644   3
  -1  16  -4 101.388 38.0142   7
  -1  16  -4 50.2170 40.0937   3
   1 -16   5 29.0608 42.1008   2
   1  16   5 99.0242 42.8436   3
  -1  16  -5 49.4319 37.6790   7
  -1  16  -5 17.0774 37.7509   3
   1  16   6 7.90379 38.8747   3
  -1  16  -6 33.1915 37.8513   7
   1 -16   6-33.3984 44.4616   2
  -1  16  -6-19.4072 42.1380   3
  -1  16  -7 44.9328 43.7226   3
  -1  16  -7 32.8245 41.5809   7
   1 -16   7 15.5637 46.5555   2
  -1  16  -8 97.8536 42.7968   3
  -1  16  -8 5.08528 42.3264   7
   1 -16   8 72.3999 46.5403   2
   1  17  -8 46.2988 50.7471   3
  -1  17   8 30.8246 46.5039   7
  -1 -17   8 73.2913 47.8677   4
  -1 -17   7-23.5956 50.5090   4
  -1  17   7-59.3910 54.3283   7
   1  17  -7-3.77364 53.4549   3
  -1  17   6 279.690 47.6371   3
  -1  17   6 450.148 59.2767   7
  -1 -17   6 471.513 61.8361   4
   1  17  -6 427.870 59.7712   3
  -1  17   5 2.70248 44.1212   7
  -1  17   5-71.2962 37.8032   3
   1  17  -5 72.9555 47.0695   6
   1  17  -5 53.0089 47.9963   3
  -1  17   4 368.094 50.1821   3
  -1 -17   4 414.457 55.2100   4
  -1  17   4 398.880 51.9782   7
   1  17  -4 410.723 56.9881   6
   1  17  -4 364.639 51.5803   3
  -1 -17   3 33.5610 43.6118   4
   1  17  -3 93.1193 47.0244   6
  -1  17   3 69.6769 39.3902   3
  -1  17   3 91.1494 36.0526   7
  -1  17   2 619.507 61.3308   7
  -1  17   2 552.775 61.3483   3
  -1 -17   2 534.503 62.4400   4
  -1 -17   1 29.5091 41.6522   4
  -1  17   1 64.0345 42.6296   3
   1  17  -1-0.29052 42.7541   6
  -1  17   1 48.0695 33.3865   7
  -1 -17   0 22.7201 43.9823   4
  -1  17   0 21.9682 34.2569   7
  -1  17   0-13.1111 41.9015   3
  -1  17  -1 26.1786 32.8225   7
  -1  17  -1 21.0581 41.6397   3
  -1  17  -2 192.851 35.6894   7
  -1  17  -2 225.209 44.0430   3
  -1  17  -3 42.1057 36.7748   7
   1 -17   3 37.1244 29.1973   2
  -1  17  -3 20.4097 39.6650   3
  -1  17  -4 244.807 42.6645   7
  -1  17  -4 211.869 44.1857   3
   1 -17   4 133.183 36.9035   2
  -1  17  -5 36.4771 39.8121   7
   1  17   5 43.3842 47.1605   3
   1 -17   5 24.6199 37.1894   2
  -1  17  -5 5.37647 41.9454   3
   1  17   6-49.6059 40.2136   3
  -1  17  -6 41.9654 38.7956   7
   1 -17   6 3.43607 42.6017   2
  -1  17  -6 4.86816 38.7959   3
  -1  17  -7 48.9335 40.9542   7
   1 -17   7 8.69720 44.7359   2
  -1  17  -7 40.2279 38.2993   3
   1 -17   8 10.5741 44.4638   2
  -1  17  -8 28.4124 39.5812   7
  -1  17  -8 8.17458 39.5930   3
  -1 -18   7 35.0617 51.0648   4
   1  18  -7 40.4437 50.8100   3
  -1  18   7-12.8715 48.7888   7
  -1 -18   6 66.1456 53.3017   4
  -1  18   6-7.36932 36.8667   3
  -1  18   6-19.9761 43.6698   7
   1  18  -6-17.2648 54.1942   3
  -1  18   5 211.145 44.6158   3
  -1  18   5 241.696 45.9873   7
   1  18  -5 210.380 50.5093   3
  -1  18   4 22.8332 37.8019   7
  -1 -18   4 3.01286 46.6895   4
  -1  18   4 3.24851 40.6357   3
   1  18  -4-21.1800 42.4081   3
   1  18  -4 40.5183 54.5627   6
  -1  18   3 468.687 55.5631   7
  -1 -18   3 562.364 64.8936   4
  -1  18   3 525.317 60.4205   3
  -1 -18   2 124.103 45.0486   4
  -1  18   2 141.638 36.6546   7
  -1  18   2 142.306 40.4920   3
   1  18  -2 192.896 51.7150   6
  -1 -18   1-44.2851 43.9697   4
  -1  18   1 20.1180 34.1416   7
  -1  18   1-23.4275 38.7012   3
  -1  18   0 187.938 37.7332   7
  -1 -18   0 154.047 52.4214   4
  -1  18   0 307.828 46.4917   3
  -1  18  -1 86.1163 40.3239   3
  -1  18  -1 45.4381 32.4978   7
  -1  18  -2 96.4036 35.0821   7
  -1  18  -2 140.200 44.4060   3
  -1  18  -3 171.171 37.6181   7
  -1  18  -3 252.565 42.7099   3
   1  18   4 20.2758 49.2592   3
  -1  18  -4 40.4402 38.8993   7
  -1  18  -4-3.50560 39.3711   3
  -1  18  -5 16.3747 39.7082   7
   1  18   5 44.3331 45.6326   3
   1 -18   5 9.29106 34.8357   2
  -1  18  -5 62.6565 42.2575   3
   1  18   6-7.94930 43.7372   3
  -1  18  -6-26.7150 42.4806   3
  -1  18  -6-17.2842 38.6820   7
   1 -18   6 47.6925 39.7495   2
  -1  18  -7 105.827 38.7748   7
  -1  18  -7 9.23230 40.8424   3
   1 -18   7 30.0152 43.3518   2
   1  19  -6-80.9243 52.5113   3
  -1  19   6 9.51545 34.3537   3
  -1  19   5 63.7381 37.2046   7
   1  19  -5 12.6124 47.8986   3
  -1  19   5 63.6722 38.6138   3
  -1 -19   4-4.91418 50.8202   4
  -1  19   4 22.9860 34.1286   7
  -1  19   4 41.9477 42.5148   3
   1  19  -4 29.8163 54.2382   6
   1  19  -4 76.0178 42.8750   3
  -1 -19   3 110.547 49.4687   4
  -1  19   3 42.0256 34.0447   7
  -1  19   3 27.2447 38.9304   3
  -1 -19   2 59.8439 46.8428   4
  -1  19   2 14.3285 40.7650   3
  -1  19   2 19.8608 32.5040   7
  -1  19   1 508.312 52.5190   3
  -1 -19   1 381.630 58.9328   4
  -1  19   1 377.432 46.2989   7
  -1  19   0 15.3949 32.3192   7
  -1  19   0 23.5770 40.9247   3
  -1  19  -1 451.704 54.4251   3
  -1  19  -1 366.743 43.3333   7
  -1  19  -2 46.6893 32.1731   7
  -1  19  -2 21.9078 41.8416   3
  -1  19  -3 100.291 40.2434   3
  -1  19  -3 106.474 34.8439   7
   1  19   4 62.7493 50.8151   3
  -1  19  -4 15.2732 37.7087   7
  -1  19  -4 48.8425 39.4935   3
   1  19   5 51.7872 46.4437   3
  -1  19  -5 37.0366 37.4362   7
  -1  19  -5-43.0250 40.6662   3
   1  19   6 120.794 44.1889   3
  -1  19  -6 44.8403 37.9924   7
  -1  19  -6 76.6258 42.9369   3
  -1  20   5 303.913 46.6454   3
   1  20  -5 392.736 56.5288   3
  -1 -20   4 52.6965 53.2672   4
  -1  20   4 77.6186 42.0718   3
   1  20  -4-72.6529 43.7769   3
  -1 -20   3 248.029 54.1362   4
  -1  20   3 224.914 45.5032   3
  -1  20   3 188.139 34.9328   7
  -1 -20   2-14.7044 49.2201   4
  -1  20   2 57.3726 39.4835   3
  -1  20   2 57.0502 28.7964   7
  -1  20   1 8.21238 38.8766   3
  -1  20   1 21.8466 30.4651   7
  -1  20   0 89.9898 31.5145   7
  -1  20   0 108.821 45.2839   3
  -1  20  -1 16.9824 31.9650   7
  -1  20  -1-24.3012 39.4660   3
  -1  20  -2 62.6863 31.8208   7
  -1  20  -2-31.5840 40.5164   3
  -1  20  -3 265.642 45.2400   3
  -1  20  -3 220.205 38.9304   7
  -1  20  -4 172.095 38.5624   7
   1  20   4 110.905 51.3480   3
  -1  20  -4 152.351 44.3666   3
   1  20   5 128.143 48.8535   3
  -1  20  -5 164.338 44.8111   3
  -1 -21   4 193.022 57.9665   4
  -1  21   4 171.556 43.1584   3
   1  21  -4 171.932 46.6042   3
  -1  21   3 101.054 41.5376   3
  -1 -21   3 24.2511 53.8775   4
  -1  21   2 79.2082 43.3397   3
  -1  21   1 64.2791 40.5141   3
  -1  21   0 64.3388 44.2233   3
  -1  21  -1 50.1100 44.2381   3
  -1  21  -2 72.4722 41.1548   3
   1  21   3 254.753 47.6102   3
  -1  21  -3 174.784 43.1404   3
  -1  21  -4 234.354 45.9389   3
   1  21   4 119.656 47.7547   3
  -1  22   3-4.56342 42.9954   3
  -1  22   2 51.6263 43.0638   3
  -1  22   1-38.9107 39.1550   3
  -1  22   0 200.051 42.4084   3
  -1  22  -1 15.0766 41.6081   3
  -1  22  -2 340.201 49.8471   3
  -1  22  -3 29.2303 38.3937   3
   2   0 -11-24.5029 61.7980   3
  -2   0  11-25.8588 42.0509   7
   2   0 -10 501.875 81.6035   3
  -2   0  10 329.413 50.8400   7
  -2   0   9-3.34573 41.2404   7
   2   0  -9-120.375 76.7651   3
  -2   0   8 304.891 48.2211   7
   2   0  -8 435.926 72.5476   3
  -2   0   7 12.3896 41.8510   7
  -2   0   6 607.300 64.3990   7
  -2   0   5 15.8047 35.0645   1
  -2   0   5 14.1671 36.4115   7
  -2   0   4 390.960 43.5420   7
   2   0  -3-13.5919 20.5851   3
  -2   0   3-6.48610 27.7076   7
  -2   0   2 763.353 74.2431   7
   2   0  -2 932.363 70.7356   3
  -2   0   1 13.9915 33.0310   1
  -2   0   1 4.13219 26.7971   7
  -2   0   0 1845.11 154.286   1
  -2   0   0 2038.03 154.016   7
   2   0   1 7.78519 20.4857   5
  -2   0  -1-0.98549 32.1368   1
   2   0   2 697.929 57.4240   5
   2   0   3 16.7624 15.5166   6
   2   0   3-12.0483 29.9311   2
   2   0   4 31.7698 32.5698   2
   2   0   5 64.3611 31.3013   2
   2   0   6 13.5030 28.0119   2
   2   0   7-16.5462 26.2788   2
   2   0   8 72.5147 27.5262   2
   2   0   9 25.2114 29.2530   2
   2   0  10 135.250 32.5715   2
  -2   0 -11-112.355 68.1907   3
   2   1 -11 23.7789 65.1239   3
   2  -1 -11-29.2764 64.6034   3
  -2   1  11 14.8948 41.9671   7
  -2  -1  11 18.8627 40.7864   7
  -2  -1  10 105.883 38.7734   7
   2   1 -10 127.392 71.9979   3
   2  -1 -10 122.529 77.5772   3
  -2   1  10 133.194 40.2667   7
   2   1  -9 128.468 62.6239   3
   2  -1  -9-20.6750 79.8450   3
  -2  -1   9 97.8653 39.1471   7
  -2   1   9 118.061 41.5179   7
   2   1  -8 98.3124 57.5051   3
  -2  -1   8 96.9352 38.8846   7
  -2   1   8 143.493 45.2524   7
   2   1  -7 227.361 53.4072   3
  -2  -1   7 201.913 42.0747   7
  -2   1   7 183.928 46.5673   7
  -2  -1   6 1177.28 99.2091   7
  -2   1   6 1192.70 99.4579   7
   2   1  -6 1096.93 100.263   3
  -2   1   5 152.653 35.2535   7
  -2  -1   5 75.8974 42.1949   1
  -2   1   5 131.285 36.5857   1
  -2  -1   5 121.048 40.7117   7
  -2  -1   4 3313.49 271.512   1
  -2   1   4 3667.19 271.088   1
  -2  -1   4 3717.80 271.481   7
  -2   1   4 3353.36 270.826   7
   2   1  -4 3347.11 270.429   3
  -2   1   3 247.354 36.8965   1
   2   1  -3 255.038 29.4373   3
  -2  -1   3 278.987 33.9066   7
  -2   1   3 249.078 36.0714   7
   2   1  -2 378.479 29.5833   3
  -2   1   2 245.035 36.4848   7
  -2  -1   2 314.284 40.2471   1
   2  -1  -2 293.448 26.5068   3
  -2  -1   2 268.385 33.8418   7
   2   1  -1 142.739 12.4461   3
  -2   1   1 110.787 32.9186   7
  -2  -1   1 88.4687 35.2240   1
  -2  -1   1 83.1282 24.7077   7
  -2   1   0 121.550 33.5586   7
  -2  -1   0 70.4359 34.4606   1
  -2   1   0 74.5226 33.0070   1
  -2  -1   0 88.9543 25.2083   7
   2   1   1 907.012 70.2874   5
  -2  -1  -1 793.169 71.1939   7
  -2  -1  -1 846.522 75.3294   1
  -2   1  -1 893.292 72.4863   7
   2  -1   2 147.905 19.8444   5
   2  -1   3 15.4394 12.4614   6
   2   1   3 3.28798 19.0302   6
   2  -1   3 14.1255 30.9086   2
   2   1   3 11.2146 28.4643   2
   2   1   4 71.5820 30.6086   2
   2  -1   4 72.9989 33.5670   2
   2  -1   5 8.78918 30.8453   2
   2   1   5 10.7129 27.9557   2
   2  -1   6 21.5986 30.1202   2
   2   1   6 29.4962 26.3267   2
   2   1   7 47.7344 24.2905   2
   2  -1   7 37.8247 31.2708   2
   2   1   8 8.61320 25.3998   2
   2  -1   8 5.94874 33.0244   2
   2  -1   9 92.2236 36.4641   2
   2   1   9 83.6978 27.4762   2
  -2   1 -10-32.2787 67.0720   3
   2  -1  10 76.0155 32.8482   2
   2   1  10 6.50174 24.6571   2
  -2   1 -11 1.88584 62.0535   3
   2  -1  11 24.3959 32.2661   2
   2   2 -11-8.44740 70.9376   3
   2  -2 -11-87.5643 66.3744   3
  -2  -2  11 79.8774 43.2167   7
  -2   2  11 147.364 43.0385   7
   2   2 -10 194.034 68.9371   3
  -2  -2  10 150.969 40.5272   7
  -2   2  10 195.720 41.6505   7
   2   2  -9 40.2042 62.8369   3
  -2  -2   9 36.4432 38.1950   7
  -2   2   9 34.1881 44.9696   7
   2   2  -8 227.158 56.9157   3
  -2  -2   8 342.646 45.4299   7
  -2   2   8 323.520 51.4203   7
  -2  -2   7 614.495 63.4912   7
  -2   2   7 694.234 69.7904   7
   2   2  -7 708.627 67.3295   3
   2   2  -6 100.050 38.9623   3
  -2  -2   6 134.314 37.3552   7
  -2  -2   5 5231.40 416.157   1
  -2   2   5 5261.98 414.759   1
  -2  -2   5 5575.14 415.260   7
  -2   2   5 5250.42 415.152   7
   2   2  -5 5326.70 414.833   3
  -2  -2   4 418.372 44.7984   7
   2   2  -4 298.985 40.0533   3
  -2  -2   3 674.071 56.0942   7
   2   2  -3 555.062 52.5691   3
  -2  -2   3 651.342 59.0890   1
  -2   2   3 663.860 56.4405   1
  -2   2   3 611.755 57.4603   7
   2   2  -2 58.7802 21.2650   3
  -2  -2   2 95.9104 34.4862   1
  -2   2   2 65.8327 30.0198   1
  -2  -2   2 72.7732 22.6858   7
  -2   2   2 56.3653 30.5627   7
  -2   2   1 9.82635 33.9813   7
  -2  -2   1 13.4730 19.3751   7
   2   2  -1-2.18946 14.6847   3
  -2  -2   1 27.5569 33.0051   1
   2   2   0 439.547 41.7384   5
  -2  -2   0 357.884 49.3212   1
  -2  -2   0 326.638 37.7460   7
  -2   2   0 488.821 49.0375   7
   2   2   0 455.949 35.4172   3
   2   2   1 262.581 31.1454   5
  -2   2  -1 286.783 27.4756   3
  -2  -2  -1 214.460 37.9347   1
  -2  -2  -1 276.317 31.1741   7
   2   2   1 271.555 26.9262   3
   2  -2   1 261.584 35.3030   2
  -2   2  -1 274.392 37.7836   7
   2  -2   2 16.1881 15.3573   5
   2  -2   2 2.99123 27.6558   2
   2   2   3 57.1897 22.0354   6
   2   2   3 74.1735 29.2767   2
   2  -2   4-5.72427 31.2782   2
   2   2   4 5.20934 29.9725   2
   2   2   5 29.0508 28.9470   2
   2  -2   5 40.0411 32.3144   2
   2   2   6 2.71082 25.0989   2
   2  -2   6 47.2004 33.0816   2
   2   2   7 14.5515 22.6517   2
   2  -2   7-66.2266 35.3910   2
   2   2   8 13.3559 21.7963   2
   2  -2   8 49.4023 38.4681   2
   2   2   9 10.5469 23.8541   2
   2  -2   9 7.06750 39.1117   2
  -2   2 -10 4.81725 60.4139   3
   2  -2  10 45.5380 40.8835   2
  -2   2 -11-9.72624 55.4735   3
   2  -2  11 26.7662 35.8354   2
   2   3 -11 20.0155 72.2987   3
  -2  -3  11 0.65297 44.4455   7
  -2   3  11-12.5255 41.4806   7
  -2   3  10 56.0671 40.6332   7
   2   3 -10 87.4108 67.9314   3
  -2  -3  10 36.1204 39.7536   7
   2   3  -9 593.209 64.7778   5
   2   3  -9 706.433 75.6509   3
  -2  -3   9 480.035 58.5436   7
  -2   3   9 521.463 64.3781   7
   2   3  -8 277.207 54.2913   5
   2   3  -8 240.457 51.9061   3
  -2  -3   8 181.115 40.6979   7
  -2   3   8 228.062 49.1930   7
  -2   3   7 763.664 70.0491   7
   2   3  -7 659.589 69.8590   3
  -2  -3   7 664.152 63.7065   7
  -2  -3   6 630.569 58.7315   7
  -2   3   6 533.963 62.6718   7
   2   3  -6 605.122 60.5827   3
   2   3  -5 369.262 49.8169   3
  -2  -3   5 498.917 49.1900   7
  -2   3   4 477.237 44.3982   1
   2   3  -4 356.618 44.2720   3
  -2  -3   4 424.580 46.1893   7
  -2   3   4 455.137 47.6120   7
  -2   3   3 215.085 31.9343   1
  -2  -3   3 204.858 32.8368   7
  -2   3   3 161.710 35.2900   7
  -2  -3   3 198.849 36.4653   1
   2   3  -2 0.06260 22.9516   3
   2   3  -2 4.58716 32.2868   5
  -2   3   2-42.1955 34.0292   7
  -2   3   2 9.67711 29.9910   1
  -2  -3   2 21.8811 22.3349   7
  -2  -3   2-3.03463 34.0440   1
  -2  -3   1 447.449 46.5490   1
  -2   3   1 429.145 47.8752   7
  -2  -3   1 375.225 35.7119   7
   2   3  -1 419.266 36.8312   3
  -2   3   1 465.321 46.2082   1
   2   3   0 55.1192 25.5283   5
  -2  -3   0 92.6338 33.0263   1
  -2  -3   0 85.3927 16.2318   7
   2   3   0 44.2511 18.5898   3
  -2   3   0 81.3750 14.4291   3
  -2   3   0 70.4213 36.5953   7
   2   3   1 1983.87 152.837   5
  -2   3  -1 1806.77 151.300   3
  -2  -3  -1 1931.56 154.308   1
   2   3   1 2205.99 152.037   3
   2  -3   1 2044.25 153.517   2
  -2  -3  -1 1717.37 151.835   7
  -2   3  -1 2249.02 154.722   7
  -2   3  -2 245.687 27.1007   3
   2   3   2 161.640 26.2642   3
   2  -3   2 218.948 33.3970   2
  -2  -3  -2 226.801 32.1902   1
  -2   3  -2 125.328 35.2618   7
   2   3   3 30.4334 24.2376   6
  -2  -3  -3 7.13775 7.33937   4
   2   3   4 111.726 29.2069   2
   2   3   4 45.0508 28.7327   6
   2   3   5 197.453 32.3148   2
   2  -3   5 221.915 38.1510   2
   2   3   6 23.9641 22.5535   2
   2  -3   6 75.8121 37.2787   2
   2   3   7 37.1148 22.1982   2
   2  -3   7 88.0555 43.0316   2
   2   3   8 16.3992 21.4252   2
   2  -3   8-41.5356 47.3892   2
   2   3   9 118.695 24.6517   2
  -2   3  -9 84.5899 57.9714   3
   2  -3   9 209.755 50.8388   2
  -2   3 -10-38.4829 53.3478   3
   2  -3  10 19.6230 46.0153   2
  -2   3 -11 5.62985 54.2009   3
   2  -3  11 7.47002 40.1995   2
  -2  -4  11-45.1324 45.9303   7
  -2   4  11 14.6273 39.9784   7
   2   4 -10 59.6187 70.1111   3
  -2  -4  10-56.3782 41.2624   7
  -2   4  10 9.21682 44.5173   7
   2   4  -9 102.720 41.0122   5
   2   4  -9 76.1038 59.6861   3
  -2  -4   9 81.7736 38.3781   7
  -2   4   9 126.325 47.9068   7
   2   4  -8 245.652 42.7195   5
   2   4  -8 292.551 54.0891   3
  -2  -4   8 268.869 41.4741   7
  -2   4   8 286.840 51.8226   7
   2   4  -7 378.131 45.5605   5
   2   4  -7 287.598 49.0601   3
  -2  -4   7 217.444 41.5833   7
  -2   4   7 321.966 51.3936   7
   2   4  -6 694.632 62.3828   5
  -2  -4   6 623.146 60.7974   7
  -2   4   6 660.576 66.0591   7
   2   4  -6 699.192 65.3122   3
   2   4  -5 2228.76 170.277   5
   2   4  -5 2281.41 170.236   3
  -2   4   5 2309.67 169.271   1
  -2  -4   5 2012.22 168.849   7
  -2   4   5 1899.72 169.620   7
   2   4  -4 58.9687 30.8986   5
   2   4  -4 39.9081 29.4941   3
  -2   4   4 64.5883 33.6512   7
  -2   4   4 83.2264 28.1303   1
  -2  -4   4 73.2655 30.0752   7
  -2  -4   4 11.1365 41.7454   1
   2   4  -3 94.3830 27.6607   3
   2   4  -3 18.9795 31.4246   5
  -2  -4   3 54.4218 35.3328   1
  -2   4   3 90.2585 27.5978   1
  -2   4   3 103.718 32.8214   7
  -2  -4   3 110.957 26.4715   7
   2   4  -2 30.9476 31.2512   5
  -2  -4   2 69.0862 34.9919   1
  -2   4   2 128.166 30.3010   1
  -2   4   2 113.851 36.9440   7
   2   4  -2 61.0790 25.5460   3
  -2  -4   2 129.196 22.8146   7
  -2   4   1-13.4154 31.3857   1
  -2  -4   1 17.2910 32.8993   1
  -2  -4   1 6.79115 15.4722   7
  -2   4   1 0.62139 12.9330   3
  -2   4   1-0.54187 37.1011   7
   2   4  -1-5.23414 22.2509   3
   2   4   0 48.8311 28.3540   5
  -2   4   0 80.0675 17.7168   3
  -2  -4   0 81.1749 34.3266   1
   2   4   0 32.3969 22.4243   3
  -2   4   0 124.415 38.1258   7
  -2  -4  -1 472.078 37.4016   7
  -2  -4  -1 546.160 50.2417   1
   2   4   1 440.525 41.6648   3
   2  -4   1 398.297 45.3075   2
  -2   4  -1 390.143 39.5008   3
  -2   4  -1 444.243 48.1733   7
  -2  -4  -2 442.179 38.1369   1
   2   4   2 371.902 37.8625   3
   2  -4   2 394.601 41.5669   2
  -2   4  -2 449.386 44.1005   7
   2   4   3 144.638 28.0687   6
  -2  -4  -3 113.767 16.3149   4
  -2   4  -3 79.7875 25.7051   3
  -2  -4  -3 191.530 26.4140   1
   2  -4   3 217.457 33.2506   2
  -2   4  -4 111.259 33.6048   3
   2   4   4 226.931 32.4733   6
  -2   4  -5 492.461 60.2525   3
   2   4   5 590.106 51.8571   2
   2   4   6 41.7024 22.8832   2
   2  -4   6 68.4906 37.1977   2
  -2   4  -7 77.6903 53.0763   3
   2   4   7 115.371 23.3412   2
   2  -4   7 162.914 47.8460   2
  -2   4  -8-8.74116 51.5546   3
   2   4   8 29.4896 21.0328   2
   2  -4   8 30.9791 52.6747   2
  -2   4  -9 21.7193 54.4888   3
   2  -4   9 48.1141 54.3398   2
  -2   4 -10 30.6323 56.4810   3
   2  -4  10 113.981 51.5930   2
  -2   4 -11 84.4548 55.4581   3
   2  -4  11 110.914 46.6871   2
   2   5 -11 26.3305 67.2691   3
  -2   5  11 30.0314 42.3595   7
   2   5 -10 47.0639 66.8737   3
  -2  -5  10-31.0950 44.1928   7
  -2   5  10 82.8294 43.6296   7
  -2   5   9 30.6801 44.8190   7
   2   5  -9 42.8426 34.8559   5
   2   5  -9 76.1872 55.4189   3
  -2  -5   9-44.6687 36.9811   7
  -2   5   8 143.033 49.0731   7
   2   5  -8 141.220 36.5751   5
   2   5  -8 139.357 47.9304   3
  -2  -5   8 49.8573 37.1247   7
   2   5  -7 137.250 34.7453   5
   2   5  -7 139.037 39.9229   3
  -2   5   7 141.205 43.3129   7
  -2  -5   7 83.0047 33.4665   7
   2   5  -6 843.116 70.0823   5
  -2  -5   6 734.675 69.8806   7
  -2   5   6 792.180 74.5808   7
   2   5  -6 902.701 75.7084   3
  -2   5   5 162.170 35.6983   7
   2   5  -5 96.5996 32.1029   5
   2   5  -5 126.509 36.6235   3
  -2   5   5 187.503 32.2939   1
  -2  -5   5 136.659 29.3786   7
   2   5  -4 312.414 39.9707   3
   2   5  -4 223.485 39.3539   5
  -2  -5   4 304.090 54.1069   1
  -2   5   4 273.028 41.3017   7
  -2  -5   4 325.112 34.6412   7
  -2   5   4 385.576 36.9474   1
   2   5  -3 87.2767 28.9703   3
   2   5  -3 48.9796 31.0264   5
  -2  -5   3 44.9128 39.6065   1
  -2   5   3 39.7176 27.4240   1
  -2  -5   3 20.1970 21.7125   7
  -2   5   3 32.4424 34.7347   7
  -2   5   2 142.419 31.0961   1
   2   5  -2 63.2224 30.5484   5
  -2  -5   2 107.988 19.0715   7
  -2   5   2 82.9733 36.0054   7
  -2  -5   2 105.527 34.1489   1
  -2   5   2 108.845 19.3398   3
   2   5  -2 77.8143 29.2062   3
  -2  -5   1 86.4154 32.8239   1
  -2   5   1 40.8981 17.2183   3
  -2   5   1 73.1922 31.2993   1
  -2   5   1 70.9105 35.2891   7
   2   5  -1 61.1218 26.4073   3
   2   5   0 146.547 33.8133   5
  -2  -5   0 252.380 35.4795   1
   2   5   0 227.208 29.2769   3
  -2   5   0 210.984 40.0866   7
  -2   5   0 132.351 23.8302   3
  -2   5  -1 306.492 30.8792   3
  -2  -5  -1 289.579 36.9391   1
   2  -5   1 204.036 37.5267   2
   2   5   1 264.877 33.7614   3
  -2   5  -1 286.234 44.8950   7
  -2  -5  -2 1394.56 104.492   1
   2   5   2 1184.97 104.232   3
   2  -5   2 1291.37 104.912   2
  -2   5  -2 1421.63 103.238   3
  -2   5  -2 1211.64 106.446   7
   2   5   2 1154.88 105.407   6
  -2  -5  -3 584.020 53.5113   4
  -2   5  -3 500.427 62.7802   7
  -2  -5  -3 549.427 56.6122   1
   2   5   3 738.899 58.2899   3
   2  -5   3 815.796 59.9857   2
  -2   5  -3 874.886 58.7424   3
   2   5   3 714.558 59.1368   6
  -2   5  -4 1932.77 134.804   3
  -2  -5  -4 1538.64 132.072   1
   2  -5   4 1636.12 134.354   2
   2   5   4 1717.13 134.058   6
  -2  -5  -5 265.964 29.9358   1
  -2   5  -5 374.506 45.4783   3
  -2   5  -6 178.968 46.4563   3
  -2   5  -7 7.27890 46.5733   3
   2  -5   7-3.06075 46.7812   2
  -2   5  -8 28.9434 51.5314   3
   2  -5   8 63.1002 52.4760   2
  -2   5  -9-31.8651 57.3038   3
   2  -5   9 42.0805 59.0113   2
  -2   5 -10 4.11974 58.5185   3
   2  -5  10-15.2080 55.8162   2
  -2   5 -11-71.1229 59.6515   3
   2  -5  11 56.4713 48.5065   2
   2   6 -11-0.49316 65.6364   3
  -2   6  11 78.8059 43.7730   7
  -2   6  10-25.0942 47.9674   7
   2   6 -10 5.01185 58.1906   3
   2   6  -9 15.7853 34.6772   5
   2   6  -9 42.5045 52.5605   3
  -2  -6   9 46.3958 36.6933   7
  -2   6   9 74.3488 48.0039   7
   2   6  -8 105.346 34.3122   5
   2   6  -8 161.314 46.3430   3
  -2  -6   8 91.4228 35.0624   7
  -2   6   8 108.589 45.6571   7
  -2   6   7 40.4463 44.9893   7
   2   6  -7 68.6769 31.3653   5
   2   6  -7 76.0468 37.8008   3
  -2  -6   7 34.9690 31.6270   7
   2   6  -6 457.851 46.2710   5
  -2  -6   6 441.647 46.0795   7
   2   6  -6 539.619 52.4366   3
  -2   6   6 402.892 52.7209   7
  -2   6   5 161.359 38.4736   7
   2   6  -5 174.371 30.6263   5
   2   6  -5 240.278 40.1229   3
  -2  -6   5 152.923 29.8445   7
  -2   6   5 199.215 32.3766   1
   2   6  -4-23.1574 27.4783   5
  -2  -6   4 34.3443 23.5255   7
  -2   6   4 21.4942 36.5749   7
  -2   6   4 57.9071 26.7069   1
   2   6  -3 128.442 31.8965   3
   2   6  -3 96.5333 29.9904   5
  -2   6   3 89.6718 21.5769   3
  -2   6   3 77.7301 27.5428   1
  -2  -6   3 96.9155 40.3709   1
  -2  -6   3 105.749 24.0687   7
  -2   6   3 46.8294 37.0159   7
   2   6  -2 23.4203 31.0918   5
  -2   6   2 68.1838 30.1698   1
  -2   6   2 44.1110 20.1169   3
  -2  -6   2 29.5498 32.5247   1
  -2   6   2 38.9658 39.0083   7
   2   6  -2 50.3242 30.1906   3
  -2   6   1-11.6193 33.1833   1
  -2   6   1-2.86843 21.2143   3
  -2   6   1-12.2717 35.2542   7
  -2  -6   1 45.0179 32.8543   1
   2   6  -1 81.8454 29.4023   3
  -2   6   0 481.812 41.4945   3
  -2  -6   0 527.173 47.1789   1
  -2   6   0 484.701 52.8299   7
   2  -6   0 401.760 48.1907   2
   2   6   0 362.700 44.0939   3
   2  -6   1 251.406 35.3380   2
  -2   6  -1 200.966 30.4326   3
  -2   6  -1 270.680 42.2970   7
  -2  -6  -2 3895.12 288.812   4
  -2  -6  -2 3938.11 289.051   1
   2   6   2 3679.32 289.027   3
   2  -6   2 3577.02 289.078   2
  -2   6  -2 3518.74 288.862   3
  -2   6  -2 3312.95 289.794   7
   2   6   2 3973.74 289.684   6
   2   6   3 158.172 33.4279   6
  -2  -6  -3 161.725 22.3955   4
  -2  -6  -3 63.1343 27.0882   1
  -2   6  -3 283.119 31.5749   3
   2   6   3 208.241 32.7882   3
   2  -6   3 175.907 34.0220   2
  -2   6  -3 137.253 40.5525   7
  -2  -6  -4 630.548 60.8342   1
   2   6   4 707.900 63.5040   3
   2  -6   4 836.659 66.7688   2
  -2   6  -4 936.294 68.2033   3
   2   6   4 716.019 66.6488   6
  -2   6  -5 3.76649 38.4077   3
  -2  -6  -5 34.4294 18.8019   1
   2  -6   5-1.54579 37.2772   2
  -2   6  -6 51.6662 44.8615   3
  -2   6  -7 51.6083 46.7353   3
   2  -6   7-74.0275 45.2102   2
   2  -6   8 182.330 55.3270   2
  -2   6  -8 171.803 54.1393   3
  -2   6  -9-0.77693 53.5294   3
   2  -6   9-29.7731 57.1965   2
  -2   6 -10 7.07803 56.2144   3
   2  -6  10 45.9682 57.5488   2
  -2   6 -11-28.6455 59.4573   3
   2  -6  11 21.6243 50.0798   2
   2   7 -11 158.536 67.0012   3
  -2   7  11 49.1270 44.1357   7
   2   7 -10-14.1895 61.9103   3
  -2   7  10-66.2192 48.6578   7
   2   7  -9 20.2207 52.8434   3
  -2   7   9 14.7123 45.6569   7
   2   7  -8 46.5887 30.8021   5
   2   7  -8 60.4927 43.9895   3
  -2  -7   8 103.476 35.6037   7
  -2   7   8 115.423 47.1985   7
   2   7  -7 65.1111 29.5471   5
   2   7  -7 146.290 39.9251   3
  -2  -7   7 41.3163 31.8189   7
  -2   7   7 74.6491 42.1503   7
   2   7  -6 250.640 35.6630   5
   2   7  -6 333.232 43.4686   3
  -2  -7   6 260.250 35.7031   7
  -2   7   6 288.865 43.8672   7
   2   7  -5 21.8055 26.5027   5
   2   7  -5 61.5744 39.1518   3
  -2   7   5 8.62838 34.1067   7
  -2  -7   5-1.61527 27.0120   7
  -2   7   5-21.7014 28.0521   1
   2   7  -4 278.127 35.2664   5
  -2   7   4 147.022 42.5904   7
  -2  -7   4 234.783 33.8581   7
  -2   7   4 231.045 32.4965   1
   2   7  -3 62.0776 32.9638   3
   2   7  -3 42.6102 31.5771   5
  -2   7   3 55.5698 25.8030   1
  -2  -7   3-24.2376 45.7521   1
  -2   7   3 18.3751 36.5939   7
  -2   7   3 25.6782 23.1066   3
   2   7  -2 93.4910 31.2487   5
  -2   7   2 57.8792 29.2158   1
  -2   7   2 74.0372 24.2648   3
  -2   7   2 63.5713 39.8651   7
   2   7  -2 117.881 33.8416   3
  -2  -7   2 123.689 36.8700   1
  -2  -7   1 51.2014 32.7056   1
  -2   7   1 78.1576 25.7103   3
  -2   7   1 74.3935 30.3193   1
  -2   7   1 60.0669 38.9727   7
   2   7  -1 76.5960 33.2850   3
   2  -7   0 194.525 35.9151   2
   2   7   0 161.307 31.6292   3
  -2   7   0 156.409 43.0607   7
  -2   7   0 139.856 27.7783   3
  -2  -7   0 204.507 33.0284   1
  -2  -7  -1 2982.96 241.259   1
   2   7   1 2945.95 241.227   3
  -2   7  -1 3074.62 240.959   3
  -2   7  -1 3268.94 243.595   7
   2  -7   1 3306.41 241.826   2
  -2  -7  -2 1594.62 112.200   1
   2   7   2 1504.61 113.289   3
   2  -7   2 1353.16 113.390   2
  -2   7  -2 1611.15 113.521   3
  -2   7  -2 1457.71 116.930   7
   2   7   2 1325.18 114.391   6
  -2   7  -3 829.002 80.0798   3
   2  -7   3 866.808 79.2422   2
  -2   7  -3 733.777 82.8234   7
  -2  -7  -4 292.413 34.4212   1
   2   7   4 402.151 42.2989   3
  -2   7  -4 443.975 44.2091   3
   2  -7   4 455.385 43.3269   2
   2   7   4 433.409 44.8172   6
  -2   7  -5 105.819 40.0945   3
   2  -7   5 129.363 36.1285   2
  -2   7  -6 239.496 47.6894   3
   2  -7   6 255.283 45.5177   2
  -2   7  -7 10.2829 49.3491   3
  -2   7  -8 8.78052 52.8499   3
   2  -7   8-16.2952 51.9769   2
  -2   7  -9 11.5638 56.8708   3
   2  -7   9 105.408 54.9642   2
  -2   7 -10 14.0541 58.1993   3
   2  -7  10 49.2545 55.6483   2
   2   8 -11 146.682 67.5296   3
   2   8 -10 113.119 65.6866   3
   2   8  -9 135.676 55.8167   3
   2   8  -8 41.9799 33.6647   5
   2   8  -8 51.7837 47.2940   3
  -2   8   8-55.7907 48.1566   7
   2   8  -7 73.1349 32.9587   5
   2   8  -7 161.456 45.4038   3
  -2   8   7 126.281 41.1797   7
   2   8  -6 56.5223 30.3860   5
   2   8  -6 47.6168 39.4196   3
  -2   8   6-13.2898 38.0728   7
   2   8  -5 134.609 32.0443   5
   2   8  -5 233.074 41.9192   3
  -2   8   5 181.238 29.1986   1
  -2   8   5 158.795 37.5786   7
   2   8  -4 74.3444 35.6740   3
   2   8  -4 14.7037 30.3217   5
  -2   8   4 7.63017 23.3260   3
  -2   8   4 29.5345 38.8725   7
  -2   8   4 22.7076 25.6368   1
  -2   8   3 54.2953 25.2999   1
  -2   8   3 50.6437 26.6157   3
  -2   8   3 12.6402 41.3628   7
   2   8  -3 113.431 32.9348   3
  -2   8   2 40.2180 26.9030   1
  -2  -8   2 3.97802 41.1309   1
  -2   8   2 40.2956 26.7551   3
  -2   8   2 23.0505 40.8322   7
   2   8  -2 9.14491 35.3226   3
  -2   8   1 24.6676 31.4779   1
  -2  -8   1 55.1846 33.1371   1
  -2   8   1 76.8498 29.2693   3
  -2   8   1 68.5492 39.7290   7
   2   8  -1 10.5790 37.3012   3
   2  -8   0 175.048 32.0775   2
   2   8   0 139.520 32.8812   3
  -2  -8   0 91.6247 31.3043   1
  -2   8   0 136.385 41.2268   7
  -2   8   0 131.694 28.2383   3
   2   8   1 341.392 48.0186   6
  -2  -8  -1 330.219 45.7784   4
   2   8   1 336.299 39.0855   3
   2  -8   1 332.931 40.1548   2
  -2   8  -1 390.191 52.7901   7
  -2  -8  -1 329.218 38.5872   1
  -2   8  -1 366.845 38.3784   3
   2   8   2 176.985 36.8828   6
  -2   8  -2 198.562 36.6272   3
  -2  -8  -2 199.908 30.2258   1
  -2  -8  -2 226.534 33.5979   4
   2   8   2 156.026 36.2382   3
   2  -8   2 212.351 34.4236   2
  -2   8  -2 203.295 48.0251   7
  -2  -8  -3 3185.16 277.982   4
  -2  -8  -3 3850.19 277.854   1
   2   8   3 3694.45 279.413   3
  -2   8  -3 3598.10 280.143   7
  -2   8  -3 3958.31 279.575   3
   2  -8   3 3493.72 279.055   2
   2   8   3 3307.37 279.405   6
  -2   8  -4 237.422 37.2399   3
   2   8   4 170.008 33.3130   3
   2  -8   4 171.233 34.7047   2
   2   8   4 205.584 38.2138   6
  -2   8  -5 687.004 65.4133   3
   2  -8   5 698.229 65.4194   2
  -2   8  -6 11.1574 43.0228   3
   2   8   6 8.49397 30.4490   7
   2  -8   6 2.03123 39.4828   2
  -2   8  -7 80.6570 47.8801   3
  -2   8  -8 11.8696 51.9682   3
  -2   8  -9 11.2539 56.7395   3
   2  -8   9 19.0925 51.7070   2
  -2   8 -10 35.8489 52.1374   3
   2  -8  10-15.8959 54.4499   2
   2   9 -10 154.696 61.8161   3
  -2  -9  10 15.7810 39.2655   4
   2   9  -9 168.035 52.2020   3
   2   9  -8 48.9045 48.3223   3
   2   9  -7 137.093 46.2142   3
   2   9  -6 70.1967 43.3425   3
   2   9  -5 14.1014 37.4873   3
  -2   9   5-25.1506 22.2662   1
   2   9  -4 33.4093 35.5376   3
  -2   9   4 0.65656 25.6586   3
  -2   9   4-25.3946 22.7478   1
  -2   9   3 109.681 25.4988   1
  -2   9   3 84.9223 29.6398   3
   2   9  -3 88.5295 33.4559   3
  -2   9   2 94.1108 29.0485   3
  -2   9   2 45.1569 25.6076   1
  -2  -9   2 15.7952 41.0592   1
   2   9  -2 73.4515 37.2961   3
  -2   9   1 44.7015 29.9451   1
  -2   9   1 62.4766 28.4781   3
  -2   9   1 58.5857 42.8116   7
   2   9  -1 105.394 40.7353   3
  -2  -9   1 29.0770 34.7681   1
  -2  -9   0 11.9488 30.4726   1
  -2   9   0 54.6570 45.0495   7
  -2  -9   0 64.8304 38.4429   4
   2  -9   0 19.4743 32.1509   2
   2   9   0 32.3043 34.5218   3
  -2   9   0 1.32894 27.3659   3
  -2   9  -1 2972.17 242.354   7
  -2  -9  -1 3136.02 238.639   1
  -2  -9  -1 3533.06 240.403   4
   2   9   1 3150.75 239.367   3
   2  -9   1 2763.74 239.030   2
  -2   9  -1 2755.26 238.760   3
   2   9   1 3272.40 240.526   6
   2   9   2 31.0575 40.0869   6
  -2   9  -2 89.2834 34.9521   3
  -2  -9  -2 28.4876 31.0243   4
  -2  -9  -2 72.3568 25.3007   1
   2   9   2 105.579 33.1088   3
   2  -9   2 89.4309 33.2673   2
  -2   9  -2 82.7864 45.6042   7
  -2  -9  -3 523.538 48.1109   4
   2   9   3 535.357 52.9943   3
  -2   9  -3 541.151 54.1907   3
   2  -9   3 469.491 50.8257   2
  -2   9  -3 439.804 57.6587   7
   2   9   3 517.731 53.2291   6
   2   9   4 1381.15 119.370   3
  -2   9  -4 1492.51 121.054   7
  -2   9  -4 1771.86 121.081   3
   2  -9   4 1439.12 119.805   2
   2   9   4 1314.65 120.702   6
  -2   9  -5 186.643 42.1125   3
   2   9   5 197.760 35.5401   3
   2  -9   5 200.706 40.8307   2
  -2   9  -5 66.1965 40.8367   7
  -2   9  -6-5.77568 39.2397   3
   2   9   6 35.6133 29.7543   7
   2  -9   6 17.9347 38.7361   2
  -2   9  -7 100.661 44.6870   3
   2  -9   7 51.1445 42.4708   2
  -2   9  -8 16.6898 51.5162   3
  -2   9  -9 118.454 51.3930   3
  -2   9 -10-14.1701 56.4937   3
   2  -9  10 55.8654 50.0138   2
   2  10 -10 76.3961 56.9089   3
  -2 -10  10-39.8226 38.2724   4
  -2  10  10 42.4169 48.8740   7
   2  10  -9 129.139 56.2423   3
  -2 -10   9 100.415 41.9337   4
   2  10  -8 143.876 51.8792   3
   2  10  -7 68.8033 43.4721   3
   2  10  -6 62.4877 41.8000   3
   2  10  -5 105.025 40.1261   3
   2  10  -4 51.6420 35.1376   3
  -2  10   4-14.2233 19.9072   1
  -2  10   4 56.1083 28.8335   3
  -2  10   3 39.1874 23.5748   1
  -2  10   3 49.0088 31.2273   3
   2  10  -3 30.2049 35.1593   3
  -2  10   2 42.9284 29.1143   3
  -2  10   2 11.0066 23.3051   1
   2  10  -2 21.6991 39.3317   3
  -2  10   1 179.215 31.8326   1
  -2  10   1 220.687 33.7555   3
   2  10  -1 242.969 43.9434   3
  -2 -10   0 3162.07 245.950   1
  -2 -10   0 2972.67 246.901   4
   2  10   0 3463.88 246.378   3
  -2  10   0 2936.67 244.753   3
   2 -10   0 3188.10 244.979   2
   2  10   1 254.428 48.5148   6
  -2 -10  -1 328.587 47.4484   4
  -2 -10  -1 393.442 40.9406   1
   2 -10   1 391.522 42.2484   2
   2  10   1 340.979 44.7220   3
  -2  10  -1 369.014 42.8158   3
  -2 -10  -2 695.814 55.9818   1
  -2 -10  -2 593.822 61.0247   4
   2  10   2 686.821 60.8222   3
  -2  10  -2 573.103 60.2357   3
   2 -10   2 541.623 58.8672   2
   2  10   2 706.770 63.1163   6
  -2 -10  -3 1188.70 102.150   4
   2  10   3 1272.58 104.228   3
   2 -10   3 1241.07 104.474   2
   2  10   3 1052.74 105.407   6
  -2  10  -4 221.176 41.5271   3
   2 -10   4 263.157 41.9952   2
   2  10   4 302.397 40.2040   3
  -2  10  -5 217.667 39.8588   3
   2  10   5 192.407 37.9113   3
   2 -10   5 201.161 41.4438   2
  -2  10  -6 139.289 44.5925   3
   2 -10   6 93.1889 41.3327   2
  -2  10  -7 109.468 46.2164   3
   2 -10   7 27.3624 41.5919   2
  -2  10  -8 85.8205 54.1786   3
   2 -10   8 73.4191 44.3984   2
  -2  10  -9 111.018 56.1786   3
  -2  10 -10 51.3677 53.5309   3
   2 -10  10-38.2678 47.6123   2
   2  11 -10 89.3906 58.4838   3
  -2 -11  10 53.8112 38.2462   4
  -2  11  10 20.2468 48.7824   7
  -2  11   9-45.4091 52.1377   7
   2  11  -9 73.0677 55.8093   3
  -2 -11   9-20.9936 41.0543   4
   2  11  -8 86.7674 48.0169   3
  -2 -11   8 61.6220 43.9868   4
   2  11  -7 103.954 47.7303   3
  -2  11   7-2.45998 47.5710   7
   2  11  -6 283.212 47.8491   3
  -2  11   6 172.956 44.1987   7
   2  11  -5-9.08961 35.3863   3
  -2  11   5-12.3051 28.1731   3
  -2  11   5 13.0513 37.8720   7
  -2  11   4 80.1613 32.0092   3
   2  11  -4 96.5249 35.5271   3
  -2  11   3 8.09091 21.9532   1
  -2  11   3 16.1225 31.9784   3
   2  11  -3-35.2696 36.4161   3
  -2  11   2 51.3033 23.6891   1
  -2 -11   2 124.360 47.2493   4
  -2  11   2 68.1029 30.4356   3
   2  11  -2 101.238 40.4893   3
   2  11  -1 243.354 42.7525   6
  -2 -11   1 234.124 44.5148   4
  -2  11   1 239.026 35.2770   3
   2  11  -1 320.927 47.1758   3
  -2  11   1 204.942 31.4939   1
  -2 -11   0 106.166 41.5486   4
   2 -11   0 197.354 34.1570   2
   2  11   0 186.168 42.3519   3
  -2  11   0 147.499 32.6749   3
  -2 -11  -1 437.054 49.7434   4
   2 -11   1 302.400 41.7405   2
   2  11   1 443.200 47.9245   3
  -2  11  -1 325.650 43.7319   3
   2  11   2 337.584 50.9538   6
  -2 -11  -2 307.184 45.2346   4
   2  11   2 334.746 42.6148   3
   2 -11   2 435.651 44.4415   2
  -2  11  -2 357.437 44.0908   3
  -2  11  -3-1.01551 33.7663   3
  -2 -11  -3 0.14571 30.3678   4
   2  11   3-0.19394 35.5147   3
   2 -11   3 2.22495 34.1242   2
   2  11   3 4.89653 41.5166   6
   2  11   4 1971.13 178.383   3
   2 -11   4 2160.27 179.369   2
  -2  11  -5 463.979 50.8594   3
   2  11   5 379.732 46.7958   3
   2 -11   5 398.925 49.7750   2
  -2  11  -6 85.7801 44.7161   3
   2 -11   6 72.6209 39.7729   2
  -2  11  -7 28.6984 47.7066   3
   2 -11   7 5.05061 41.8137   2
  -2  11  -8-9.31149 51.6355   3
   2 -11   8-19.2300 44.5655   2
  -2  11  -9 74.2310 57.5218   3
   2 -11   9-17.6226 46.4235   2
   2  12 -10 84.5171 59.2391   3
   2  12  -9 21.2051 50.1532   3
  -2  12   9 8.65762 55.3062   7
  -2 -12   9-72.6791 41.1862   4
   2  12  -8 110.603 51.7402   3
  -2 -12   8 103.482 44.6730   4
  -2  12   8 152.153 54.9922   7
   2  12  -7 71.4263 48.8393   3
  -2 -12   7 109.288 48.0337   4
  -2  12   7 112.761 49.8310   7
   2  12  -6 187.588 44.0794   3
  -2  12   6 163.519 45.3092   7
  -2 -12   5 75.1143 49.4876   4
  -2  12   5 9.78348 31.0405   3
  -2  12   5 52.8542 38.8471   7
   2  12  -5 58.6346 37.9901   3
  -2 -12   4 30.6442 50.4404   4
  -2  12   4-23.7502 42.9830   7
  -2  12   4-0.60518 33.0648   3
   2  12  -4 3.39115 36.3726   3
  -2  12   3 78.2702 44.3586   7
  -2 -12   3 70.4391 49.0653   4
  -2  12   3 39.9684 33.5489   3
   2  12  -3 73.5995 33.9865   3
  -2  12   2 35.8627 22.3207   1
   2  12  -2 2.99101 38.5387   6
  -2 -12   2 65.4464 45.5525   4
  -2  12   2 26.9870 29.4434   3
  -2  12   2 25.0839 44.0093   7
   2  12  -2 74.7374 41.4063   3
   2  12  -1 205.130 43.3303   6
  -2 -12   1 163.831 42.8925   4
  -2  12   1 240.888 36.3379   3
   2  12  -1 240.964 45.8895   3
  -2  12   1 180.532 46.4449   7
  -2  12   1 176.961 28.8787   1
  -2 -12   0 976.537 90.5093   4
   2  12   0 1249.30 92.3070   3
  -2  12   0 997.054 85.9608   3
   2 -12   0 1069.12 85.5622   2
  -2  12   0 904.201 92.7810   7
   2  12   0 931.254 89.2177   6
   2 -12   1-5.75569 30.1756   2
  -2 -12  -1 60.7350 41.0425   4
   2  12   1-28.7031 39.0113   3
  -2  12  -1 17.3699 44.9556   7
  -2  12  -1-35.2147 32.7361   3
  -2 -12  -2 287.714 45.0955   4
   2  12   2 388.362 46.0824   3
   2 -12   2 316.982 43.6722   2
  -2  12  -2 323.873 56.6120   7
  -2  12  -2 326.192 44.4492   3
   2  12   2 343.376 49.2165   6
   2  12   3 253.475 43.4083   3
   2 -12   3 370.070 41.8452   2
  -2  12  -3 188.995 48.2555   7
   2  12   3 209.205 49.6752   6
  -2  12  -3 231.122 41.0425   3
  -2  12  -4 99.2794 37.4655   3
   2  12   4 77.8759 35.3145   3
   2 -12   4 72.8384 39.9802   2
  -2  12  -4 79.4972 43.1774   7
  -2  12  -5 494.186 51.4917   3
   2  12   5 339.173 46.2754   3
   2 -12   5 401.406 50.4024   2
  -2  12  -5 375.361 51.1958   7
  -2  12  -6 116.342 46.0858   3
   2 -12   6 80.0351 40.9490   2
  -2  12  -6 85.3667 43.6767   7
  -2  12  -7 71.3756 49.0633   3
   2 -12   7 38.7282 40.2103   2
  -2  12  -8 70.8302 50.3607   3
   2 -12   8 0.71521 43.0530   2
  -2  12  -8 41.2170 60.0748   7
  -2  12  -9 70.0956 52.9921   3
   2 -12   9-41.7814 43.5687   2
  -2  12  -9-43.5562 64.8203   7
   2  13  -9 66.1862 52.1188   3
  -2 -13   9 92.3711 41.0898   4
  -2  13   9 57.6169 55.6315   7
   2  13  -8-22.7878 50.5906   3
  -2 -13   8-2.87884 44.8785   4
  -2  13   8-9.13297 56.4786   7
   2  13  -7 264.540 49.3919   3
   2  13  -7 168.899 45.4986   6
  -2 -13   7 237.131 51.5489   4
  -2  13   7 221.547 54.9530   7
   2  13  -6 130.975 45.3232   6
  -2  13   6 96.4873 45.8929   7
   2  13  -6 46.0878 42.2303   3
   2  13  -5-10.2598 44.6088   6
  -2 -13   5 12.4510 47.9983   4
  -2  13   5 33.2377 32.9661   3
  -2  13   5 51.2283 44.6271   7
   2  13  -5 17.9894 38.4872   3
   2  13  -4 55.5584 41.6095   6
  -2 -13   4-37.9903 46.8559   4
  -2  13   4 9.21550 33.7015   3
  -2  13   4-44.4499 40.4532   7
   2  13  -4-12.9313 37.7690   3
   2  13  -3-28.8007 39.9713   6
  -2 -13   3-30.2693 45.4848   4
  -2  13   3 32.1400 33.3261   3
  -2  13   3-17.5038 44.2374   7
   2  13  -3 24.0949 37.3435   3
   2  13  -2 26.5548 41.0923   6
  -2 -13   2 39.2893 45.4995   4
  -2  13   2 49.7717 29.1034   3
  -2  13   2 20.2049 44.8853   7
   2  13  -2 48.0958 40.2863   3
   2  13  -1 401.505 55.7790   6
  -2  13   1 455.994 45.0258   1
  -2 -13   1 489.877 57.8479   4
  -2  13   1 584.840 52.0223   3
   2  13  -1 660.822 59.3487   3
  -2  13   1 531.935 58.6492   7
   2  13   0 8.92654 38.7315   6
   2  13   0 33.3596 45.6948   3
  -2 -13   0-4.10873 44.7416   4
  -2  13   0-38.0863 31.5241   3
  -2  13   0 16.2031 46.1387   7
  -2 -13  -1 371.978 54.3377   4
   2 -13   1 316.086 41.4044   2
   2  13   1 394.746 49.1246   3
  -2  13  -1 428.649 56.1932   7
  -2  13  -1 344.254 45.9455   3
  -2 -13  -2 79.6880 42.9019   4
   2  13   2 112.579 40.8898   3
   2 -13   2 99.6441 32.7659   2
  -2  13  -2 142.358 45.7020   7
  -2  13  -2 43.9582 36.5994   3
   2  13   2 75.8524 46.0573   6
   2 -13   3 290.822 44.3887   2
   2  13   3 268.717 44.3112   3
  -2  13  -3 313.566 51.4496   7
  -2  13  -3 276.123 41.2326   3
   2  13   3 224.368 53.2568   6
  -2  13  -4 443.739 48.4616   3
   2  13   4 417.736 53.1377   3
   2 -13   4 392.415 52.6118   2
  -2  13  -4 450.862 55.8276   7
  -2  13  -5 288.861 43.2069   3
   2  13   5 235.397 42.9625   3
   2 -13   5 299.977 45.6658   2
  -2  13  -5 235.350 47.0840   7
  -2  13  -6 206.682 47.4945   3
   2 -13   6 175.507 42.7763   2
  -2  13  -6 107.409 46.7454   7
  -2  13  -7 51.6984 51.4858   3
   2 -13   7 20.5941 41.8422   2
  -2  13  -7 56.0725 53.6826   7
  -2  13  -8 104.702 54.2572   3
   2 -13   8-6.53951 43.4493   2
  -2  13  -8-81.6036 62.6822   7
  -2  13  -9 91.1314 55.7143   3
   2 -13   9 23.0905 42.5741   2
  -2  13  -9 10.6218 67.2008   7
  -2 -14   9 33.8203 40.0784   4
  -2  14   9 52.2512 55.0950   7
   2  14  -9 14.9166 51.7684   3
  -2 -14   8-13.1139 44.0631   4
  -2  14   8 124.272 63.9659   7
   2  14  -8 1.38968 46.5574   3
   2  14  -7 101.268 44.4727   6
  -2 -14   7 77.3147 46.7958   4
  -2  14   7 99.1765 51.0402   7
   2  14  -7 101.600 46.3184   3
   2  14  -6 49.0206 46.6126   6
  -2  14   6 0.32449 44.7117   7
   2  14  -6 30.5010 44.5007   3
   2  14  -5 572.965 60.8007   6
  -2  14   5 386.048 51.4694   3
  -2 -14   5 498.951 62.3419   4
   2  14  -5 669.163 58.0869   3
  -2  14   5 377.501 57.4661   7
   2  14  -4-10.1957 41.9161   6
  -2 -14   4-0.30088 48.0351   4
  -2  14   4 26.6230 36.1452   3
  -2  14   4-50.0247 42.7277   7
   2  14  -4-46.5256 37.4235   3
   2  14  -3 217.096 46.3016   6
  -2  14   3 235.827 50.1914   7
  -2 -14   3 274.380 49.8747   4
  -2  14   3 211.999 39.0919   3
   2  14  -3 312.103 40.5695   3
   2  14  -2-8.10184 39.3901   6
  -2 -14   2-26.1597 44.0352   4
   2  14  -2-29.5829 40.4807   3
  -2  14   2-6.98763 31.5684   3
  -2  14   2-81.6969 41.9957   7
   2  14  -1 46.9636 43.0334   6
  -2  14   1 41.1331 21.1177   1
  -2 -14   1 115.557 46.2040   4
  -2  14   1 55.9995 33.8074   3
  -2  14   1 40.6442 44.8021   7
   2  14  -1 66.4264 40.4111   3
   2  14   0 15.6400 40.1868   6
  -2 -14   0 34.2016 44.4478   4
   2  14   0 5.44868 45.9164   3
  -2  14   0 36.3132 31.1374   3
  -2  14   0-14.9226 45.5099   7
   2  14   1 31.7155 42.5013   3
  -2 -14  -1 33.8464 44.6685   4
   2 -14   1 55.6408 29.4136   2
  -2  14  -1 79.4738 46.3471   7
  -2  14  -1 39.4335 34.3570   3
   2 -14   2 60.0734 34.8694   2
  -2 -14  -2 61.9650 47.6125   4
   2  14   2 106.100 40.6100   3
  -2  14  -2 121.974 48.0025   7
  -2  14  -2 44.1666 36.8411   3
   2  14   2 122.567 45.5956   6
   2  14   3 291.913 45.0856   3
   2 -14   3 272.420 42.0848   2
  -2  14  -3 285.328 52.5737   7
  -2  14  -3 243.669 42.4043   3
   2  14   4 45.4337 38.1939   3
   2 -14   4 4.55120 38.7539   2
  -2  14  -4 66.1348 44.4393   7
  -2  14  -4 21.8142 36.1775   3
   2  14   5 955.301 93.9646   3
  -2  14  -5 1234.60 94.6332   3
  -2  14  -5 1066.75 96.1039   7
   2 -14   5 1107.37 96.1474   2
  -2  14  -6 60.6075 41.5196   3
   2 -14   6 63.8240 43.6400   2
  -2  14  -6 9.76967 47.1419   7
  -2  14  -7-18.1410 47.7727   3
   2 -14   7 13.7318 43.1201   2
  -2  14  -7 60.3405 55.6990   7
  -2  14  -8 115.560 53.2181   3
   2 -14   8-8.89227 43.2744   2
  -2  14  -8 89.8448 63.5587   7
  -2 -15   8-8.38109 43.5142   4
  -2  15   8 11.0071 59.5736   7
   2  15  -8 13.1437 45.8081   3
  -2 -15   7 57.0744 49.0293   4
  -2  15   7 123.122 57.8473   7
   2  15  -7 112.981 50.4664   3
   2  15  -6 176.336 49.9270   6
  -2  15   6 52.3906 48.6615   7
   2  15  -6 121.850 49.3156   3
   2  15  -5 59.0774 47.6072   6
  -2 -15   5 41.1235 48.1184   4
  -2  15   5 20.7782 34.7625   3
  -2  15   5 12.1226 44.2733   7
   2  15  -5 49.0193 42.8091   3
   2  15  -4 252.985 49.1306   6
  -2 -15   4 327.969 51.9621   4
  -2  15   4 222.963 41.7779   3
  -2  15   4 212.949 47.4922   7
   2  15  -4 253.398 42.2463   3
   2  15  -3 46.0514 44.4600   6
  -2  15   3 12.7045 44.4516   7
  -2 -15   3 33.9726 48.7268   4
  -2  15   3-5.43789 34.9230   3
   2  15  -3 48.3678 39.8826   3
   2  15  -2 42.2723 43.8851   6
  -2  15   2 4.34279 31.7950   3
  -2 -15   2 34.8539 46.1927   4
  -2  15   2 6.05345 45.3005   7
   2  15  -2 62.2172 39.3685   3
   2  15  -1 77.8165 44.1756   6
  -2 -15   1 182.719 48.0064   4
  -2  15   1 178.291 34.0101   3
  -2  15   1 156.335 46.8729   7
   2  15  -1 206.143 45.6004   3
   2  15   0 6.28063 41.2183   6
  -2  15   0-28.2951 25.7129   1
  -2 -15   0-37.7114 49.8651   4
   2  15   0 39.4242 43.1624   3
  -2  15   0 29.3175 33.1129   3
  -2  15   0-12.3311 45.3079   7
  -2 -15  -1 97.0965 51.0309   4
   2 -15   1 113.428 29.0843   2
   2  15   1 87.5614 46.2016   3
  -2  15  -1 70.5762 45.1005   7
  -2  15  -1 31.2254 38.1844   3
  -2 -15  -2-0.29935 50.6143   4
   2  15   2 3.60039 46.6432   3
  -2  15  -2-7.45036 47.3598   7
  -2  15  -2 18.0420 37.7201   3
   2 -15   2 16.5246 32.3575   2
   2  15   2 83.2665 49.8980   6
   2  15   3 151.521 46.4456   3
   2 -15   3 133.318 37.3822   2
  -2  15  -3 178.675 49.6613   7
  -2  15  -3 92.5155 37.1751   3
   2 -15   4 268.754 43.4476   2
  -2  15  -4 205.006 49.2399   7
   2  15   4 130.876 46.2563   3
  -2  15  -4 255.469 41.8897   3
   2  15   5 71.9982 42.8528   3
   2 -15   5 23.4233 41.9022   2
  -2  15  -5 79.3504 44.6738   7
  -2  15  -5 32.1850 40.8189   3
  -2  15  -6 4.06250 43.0032   3
   2  15   6-41.0964 36.9266   3
   2 -15   6-52.5210 44.0243   2
  -2  15  -6 84.4557 51.6204   7
  -2  15  -7 294.587 50.8243   3
   2 -15   7 199.187 49.2658   2
  -2  15  -7 315.270 61.1062   7
  -2  15  -8-4.01408 48.0876   3
   2 -15   8 47.9624 44.2040   2
  -2  15  -8 61.6775 61.6279   7
  -2 -16   8 47.8366 45.8746   4
  -2  16   8 43.0223 59.8691   7
   2  16  -8 149.206 50.5706   3
  -2 -16   7 11.0533 46.1135   4
  -2  16   7-7.03534 55.1573   7
   2  16  -7 44.9991 50.9605   3
   2  16  -6 119.461 50.5376   6
  -2  16   6 121.325 50.8226   7
   2  16  -6 160.833 50.8707   3
   2  16  -5 150.386 47.3370   6
  -2 -16   5 79.6786 50.7164   4
  -2  16   5 54.4816 35.0144   3
  -2  16   5 83.1717 43.8420   7
   2  16  -5 54.6465 43.4432   3
   2  16  -4 25.8729 48.8317   6
  -2 -16   4 85.2266 51.1112   4
  -2  16   4 22.5096 35.7583   3
  -2  16   4-8.39505 42.4281   7
   2  16  -4 52.1865 42.0165   3
   2  16  -3 40.5749 42.6259   6
  -2 -16   3 24.0626 49.4503   4
  -2  16   3 10.3484 32.2607   3
  -2  16   3-15.7474 41.8157   7
   2  16  -3 47.6848 36.1881   3
   2  16  -2 116.843 42.1299   6
  -2 -16   2 83.2261 48.9919   4
  -2  16   2 36.1144 32.9602   3
  -2  16   2 55.2007 42.9598   7
   2  16  -2 121.724 37.5577   3
   2  16  -1-13.7837 41.8491   6
  -2  16   1 17.5739 34.5047   3
  -2 -16   1-26.0513 51.7920   4
  -2  16   1 36.0220 44.5575   7
   2  16  -1-1.38581 42.2623   3
  -2 -16   0 278.886 59.9913   4
   2  16   0 436.528 55.1639   3
  -2  16   0 359.445 45.0626   3
  -2  16   0 293.012 50.0631   7
   2  16   0 290.746 50.9405   6
  -2 -16  -1 72.9378 58.0133   4
   2  16   1 34.2704 46.6222   3
  -2  16  -1 55.2509 44.6133   7
  -2  16  -1 56.2437 35.8402   3
   2 -16   2 181.178 35.9694   2
   2  16   2 244.934 50.0569   3
  -2  16  -2 165.915 47.6587   7
  -2  16  -2 252.524 43.3417   3
   2  16   2 174.389 54.0571   6
   2  16   3-21.8370 48.5135   3
   2 -16   3 47.6933 33.3109   2
  -2  16  -3 54.1474 47.4545   7
  -2  16  -3 62.9168 37.1194   3
   2  16   4 175.967 49.5372   3
   2 -16   4 171.981 41.7471   2
  -2  16  -4 173.085 49.0886   7
  -2  16  -4 199.965 42.8838   3
   2  16   5 93.6976 45.5961   3
   2 -16   5 84.8360 41.4701   2
  -2  16  -5 49.6807 46.7735   7
  -2  16  -5 92.3083 39.1166   3
   2  16   6-19.5209 37.6372   3
   2 -16   6 4.67960 42.7384   2
  -2  16  -6 74.8084 54.1005   7
  -2  16  -6-9.84735 43.2615   3
   2 -16   7 317.699 51.2651   2
  -2  16  -7 309.857 60.2710   7
  -2  16  -7 323.094 54.7438   3
  -2 -17   7 53.7830 48.8367   4
  -2  17   7 151.207 57.5312   7
   2  17  -7 145.693 52.5736   3
  -2  17   6 583.106 72.2022   7
   2  17  -6 796.391 76.2564   3
   2  17  -6 735.193 73.6317   6
   2  17  -5 30.9207 48.1317   6
  -2 -17   5 51.9993 52.8621   4
  -2  17   5 33.9878 45.6746   7
   2  17  -5 72.8704 45.1621   3
   2  17  -4 429.815 59.3038   6
  -2 -17   4 438.074 61.6683   4
  -2  17   4 361.742 48.2386   3
  -2  17   4 395.392 55.8619   7
   2  17  -4 429.217 54.7951   3
   2  17  -3 209.263 52.3244   6
  -2 -17   3 204.078 54.5259   4
  -2  17   3 192.271 38.0885   3
  -2  17   3 193.159 46.4686   7
   2  17  -3 174.146 44.0717   3
  -2 -17   2 28.9323 55.7907   4
  -2  17   2 40.1056 35.0642   3
  -2  17   2 21.7434 39.9227   7
   2  17  -2 117.725 37.1600   3
   2  17  -2 139.658 46.6977   6
  -2 -17   1 53.8095 54.4056   4
  -2  17   1 31.3841 44.2742   7
   2  17  -1 24.7940 42.0962   3
  -2  17   1 33.5191 32.6054   3
   2  17  -1 70.6174 44.4714   6
  -2 -17   0-35.0877 58.9091   4
   2  17   0 52.2714 41.2998   3
  -2  17   0 17.9320 36.0130   3
  -2  17   0 47.2799 42.6752   7
   2  17   0-14.5254 44.4669   6
  -2 -17  -1 35.5466 63.4615   4
   2  17   1 73.1194 44.1384   3
  -2  17  -1 33.2113 44.6592   7
  -2  17  -1 85.9509 39.7285   3
   2  17   1 42.9213 47.3370   6
   2  17   2 146.092 48.5019   3
  -2  17  -2 108.437 43.7956   7
  -2  17  -2 88.5043 41.2385   3
   2  17   3 155.537 52.7711   3
   2 -17   3 131.493 33.1045   2
  -2  17  -3 175.396 48.5592   7
  -2  17  -3 133.936 41.4143   3
   2  17   4 270.414 55.9164   3
   2 -17   4 192.306 40.1439   2
  -2  17  -4 284.674 52.4047   7
  -2  17  -4 244.876 41.6658   3
   2  17   5 145.161 45.3961   3
   2 -17   5 144.818 41.8402   2
  -2  17  -5 215.019 49.7475   7
  -2  17  -5 169.476 44.3588   3
   2  17   6 94.0680 40.8369   3
   2 -17   6 71.0448 43.3115   2
  -2  17  -6 115.539 50.8903   7
  -2  17  -6 115.497 42.1107   3
   2 -17   7 12.7271 42.9869   2
  -2  17  -7 47.2149 52.4828   7
  -2  17  -7-4.85924 43.7099   3
   2  18  -6 243.388 54.7323   3
  -2  18   6 189.823 49.4230   7
  -2  18   5 186.165 47.8089   7
  -2 -18   5 389.303 57.8352   4
   2  18  -5 305.409 51.9997   3
   2  18  -5 235.028 56.2535   6
  -2 -18   4-2.74758 53.3682   4
  -2  18   4 88.1103 33.9594   3
  -2  18   4-27.7641 39.3385   7
   2  18  -4 9.87210 40.9873   3
   2  18  -4-16.4605 48.6589   6
  -2 -18   3 79.8961 53.8804   4
  -2  18   3 126.402 37.4601   3
  -2  18   3 91.2707 43.4048   7
   2  18  -3 97.8553 39.7944   3
   2  18  -3 174.133 49.8434   6
  -2 -18   2 79.1573 55.5146   4
  -2  18   2 103.376 39.8563   7
   2  18  -2 160.444 40.5444   3
  -2  18   2 60.4577 37.3039   3
   2  18  -2 129.652 49.5422   6
  -2  18   1 30.1310 36.2476   3
  -2 -18   1 9.30090 58.6854   4
  -2  18   1-26.9206 40.5098   7
   2  18  -1-8.17414 40.9904   3
   2  18  -1 35.9059 46.0874   6
  -2 -18   0 99.9782 64.3562   4
   2  18   0 42.0675 45.3497   3
  -2  18   0 100.897 36.9911   3
  -2  18   0 109.080 43.0048   7
   2  18   0 139.076 48.6749   6
  -2 -18  -1 250.826 70.2275   4
   2  18   1 103.522 45.7968   3
  -2  18  -1 207.343 41.0330   3
  -2  18  -1 219.031 43.4644   7
   2  18   2-4.92668 48.1712   3
  -2  18  -2-5.70948 40.7545   7
  -2  18  -2 44.2521 38.8766   3
   2  18   3 169.006 50.5350   3
  -2  18  -3 107.153 47.8546   7
  -2  18  -3 146.602 42.3532   3
   2  18   4 12.7499 49.3224   3
  -2  18  -4 12.5999 47.1411   7
  -2  18  -4 13.4999 39.7596   3
   2  18   5 199.744 50.8016   3
   2 -18   5 136.236 40.0481   2
  -2  18  -5 253.544 51.9007   7
  -2  18  -5 214.813 42.6890   3
   2 -18   6 53.8323 41.1809   2
  -2  18  -6 33.1116 47.4218   7
  -2  18  -6 18.3663 44.8411   3
  -2  19   6 7.46375 40.4019   7
  -2 -19   5 8.35185 53.3549   4
  -2  19   5 40.3806 40.0104   7
   2  19  -5-43.8935 47.6639   3
   2  19  -5 65.9946 53.7276   6
  -2 -19   4 54.9700 53.9206   4
   2  19  -4 28.4639 44.8038   3
  -2  19   4 30.6857 37.0869   7
   2  19  -4 11.3784 55.2011   6
  -2 -19   3 146.044 58.4013   4
  -2  19   3 85.2399 41.8653   7
  -2  19   3 249.426 36.3052   3
   2  19  -3 162.178 43.6388   3
   2  19  -3 128.135 54.5846   6
  -2 -19   2 66.7357 61.4742   4
  -2  19   2-10.7064 38.9263   7
  -2  19   2 41.4173 35.9420   3
   2  19  -2 47.6337 42.1186   3
   2  19  -2 55.5873 49.1478   6
  -2 -19   1 63.3514 64.1570   4
  -2  19   1 45.4208 37.1741   3
  -2  19   1 24.5285 38.3325   7
   2  19  -1 3.20143 39.2198   3
   2  19  -1 117.962 48.9435   6
  -2 -19   0-48.3421 70.4897   4
   2  19   0 3.14005 40.0059   3
  -2  19   0 33.0541 37.5562   3
  -2  19   0 58.7205 40.8317   7
   2  19   0 58.5184 49.4085   6
   2  19   1 62.9459 45.7108   3
  -2  19  -1 35.2454 40.5148   3
  -2  19  -1 70.4267 39.2884   7
   2  19   2 45.1469 48.0094   3
  -2  19  -2 50.5327 40.5802   7
  -2  19  -2 13.7426 36.5118   3
   2  19   3 86.4534 49.5929   3
  -2  19  -3-2.97819 45.2392   7
  -2  19  -3 60.8131 40.2701   3
   2  19   4-53.9296 50.3806   3
  -2  19  -4 85.1127 42.5589   7
  -2  19  -4-41.5951 41.2196   3
  -2  19  -5 148.014 44.6313   7
  -2  19  -5 145.896 42.6325   3
  -2 -20   4 22.7241 55.5356   4
  -2  20   4-21.4545 33.7854   7
   2  20  -4 6.47548 46.0207   3
   2  20  -4-7.72870 52.8828   6
  -2 -20   3 121.190 60.3212   4
  -2  20   3 107.116 35.8781   7
   2  20  -3 78.8006 40.5741   3
   2  20  -3 104.584 52.5475   6
  -2 -20   2 111.064 65.6911   4
  -2  20   2 75.9971 37.1346   7
   2  20  -2 126.938 40.3504   3
   2  20  -2 33.5878 52.5134   6
  -2 -20   1 134.166 71.6838   4
  -2  20   1 90.5151 38.2773   3
  -2  20   1 56.9782 37.2130   7
   2  20  -1 72.6978 38.7358   3
   2  20  -1 46.0256 51.9767   6
   2  20   0-15.2405 37.1532   3
  -2  20   0 0.29020 37.8162   3
  -2  20   0-65.6644 36.6595   7
   2  20   1-67.6060 41.6621   3
  -2  20  -1-18.5992 37.2829   3
  -2  20  -1-14.9776 37.8394   7
   2  20   2-7.95834 47.7794   3
  -2  20  -2-15.8778 35.9637   3
  -2  20  -2 37.5401 39.5200   7
   2  20   3 65.9739 48.3749   3
  -2  20  -3 27.1963 39.8239   7
  -2  20  -3 78.3882 40.0089   3
   2  20   4-18.1402 48.7715   3
  -2  20  -4 3.03881 42.9885   7
  -2  20  -4 20.9754 37.6199   3
  -2 -21   3 28.6288 61.0436   4
  -2  21   3-4.79237 32.2145   7
   2  21  -3 1.75582 43.0263   3
   2  21  -3-46.0314 54.0194   6
  -2 -21   2 94.1084 67.1919   4
  -2  21   2 32.9173 33.4770   7
   2  21  -2 21.3850 39.8273   3
  -2 -21   1-67.0902 76.8792   4
  -2  21   1-3.63949 35.4154   7
   2  21  -1 0.92802 38.5274   3
   2  21   0 12.1784 36.3423   3
  -2  21   0 18.9905 33.8000   7
   2  21   1 76.0446 45.6755   3
  -2  21  -1 110.317 41.9312   7
   2  21   2-6.56400 42.7325   3
  -2  21  -2 0.30768 36.2225   3
  -2  21  -2 17.3225 40.3838   7
  -2  21  -3 96.1625 43.1086   7
  -2  21  -3 242.087 40.2370   3
  -3   0  11 36.6251 37.8387   7
  -3   0  10 158.729 43.3097   7
  -3   0   9 62.7791 41.6074   7
  -3   0   8 366.175 54.3275   7
  -3   0   7 4.40132 42.0820   7
   3   0  -6 125.107 28.4020   3
  -3   0   6 134.631 37.7006   1
   3   0  -5-10.2951 23.1666   3
  -3   0   5-24.5701 37.5813   7
  -3   0   5 45.0397 33.6655   1
  -3   0   4 58.7814 31.6773   7
  -3   0   4 134.666 37.7613   1
  -3   0   3 9.25786 29.1695   7
  -3   0   2 436.680 45.6905   7
  -3   0   1-9.50483 31.1071   7
  -3   0   1-2.80060 43.7872   1
  -3   0   0 232.350 47.8411   1
  -3   0   0 290.370 39.7411   7
  -3   0  -1 64.7569 38.7668   1
   3   0   1 20.2165 22.1254   5
   3   0   2 13.8401 20.7251   5
  -3   0  -2-8.91676 37.4154   1
  -3   0  -2-84.7166 27.5523   7
  -3   0  -3-10.6198 36.6805   1
  -3   0  -3-28.5285 23.7738   7
   3   0   5 46.5953 33.1604   2
   3   0   6 90.3980 29.8299   2
   3   0   7 7.71729 29.2625   2
   3   0   8 88.0568 27.6523   2
   3   0   9 18.2332 26.4011   2
  -3   0 -10-144.929 59.1553   3
  -3  -1  11 44.5266 40.5326   7
  -3   1  11 33.9217 38.2879   7
   3   1 -10-22.3705 73.5525   5
  -3  -1  10 14.3886 41.3554   7
  -3   1  10-26.8932 40.5544   7
  -3  -1   9 52.1414 39.8729   7
  -3   1   9 55.1743 45.1482   7
  -3   1   8 32.9481 44.6948   7
  -3  -1   8 62.8789 41.2983   7
   3   1  -7 32.1451 27.9313   3
  -3  -1   7 53.1581 42.4395   7
  -3   1   7 72.6999 45.3952   7
   3   1  -6 309.409 37.7132   3
   3  -1  -6 302.398 37.1225   3
  -3  -1   6 355.825 46.6797   1
  -3   1   6 373.704 43.7386   1
  -3  -1   6 485.069 51.3304   7
  -3   1   6 420.521 50.4314   7
  -3  -1   5-19.3630 36.7478   1
   3   1  -5 4.86387 26.0375   3
  -3  -1   5 46.0301 40.0444   7
  -3   1   5-35.5574 32.6580   7
  -3   1   5 16.7857 33.8411   1
  -3   1   4 2407.29 183.854   1
  -3  -1   4 2689.44 183.469   7
  -3   1   4 2319.11 182.811   7
   3   1  -4 2141.92 180.899   3
  -3   1   3 112.962 39.3360   1
  -3   1   3 52.0883 30.7211   7
  -3  -1   3 16.5204 29.5543   7
  -3  -1   2 169.723 41.8457   1
  -3  -1   2 162.543 29.9495   7
  -3   1   2 168.862 36.7245   7
  -3  -1   1 69.7435 44.2900   1
  -3  -1   1 67.3807 28.0442   7
  -3   1   1 42.6641 36.2976   7
   3   1   0 56.3603 28.0313   5
  -3  -1   0 69.6162 43.3354   1
  -3   1   0 63.0689 38.2168   1
  -3  -1   0 51.5734 29.3780   7
  -3   1   0 80.9782 39.0648   7
   3   1   1 118.518 24.6693   5
   3  -1   1 111.223 25.9841   5
  -3   1  -1 85.9175 39.6176   1
  -3  -1  -1 100.727 41.2777   1
  -3   1  -1 163.920 39.0833   7
   3  -1   2 61.3241 19.9784   5
  -3   1  -2 1.48535 41.6272   1
  -3  -1  -2-1.18312 36.3508   1
  -3   1  -2 85.8168 30.9429   7
  -3  -1  -3-55.4328 34.0959   1
  -3   1  -3-46.7953 26.2434   7
   3  -1   4 935.117 63.5839   2
  -3  -1  -4 914.385 58.6622   7
   3  -1   5 35.7067 32.2225   2
   3   1   6 278.284 35.0589   2
   3  -1   6 232.038 38.8597   2
   3   1   7 28.0513 25.4986   2
   3  -1   7 89.9347 30.5541   2
   3   1   8 35.0059 26.2780   2
   3  -1   8 27.5339 32.2205   2
   3  -1   9 37.3170 31.0285   2
  -3   1 -10 49.6298 52.9667   3
   3  -1  10 36.2260 29.8055   2
  -3  -2  11 75.3416 42.9337   7
  -3   2  11 53.4432 40.1818   7
   3   2 -10-8.63741 58.6763   5
  -3  -2  10-4.18034 40.8851   7
  -3   2  10 46.3091 40.8402   7
   3   2  -9-10.6541 76.6837   5
  -3  -2   9 15.6609 40.8918   7
  -3   2   9 77.2494 44.1680   7
  -3   2   8 136.075 43.8917   7
  -3  -2   8 60.1307 40.9229   7
   3   2  -7 126.770 29.9024   3
  -3  -2   7 204.442 43.0216   7
  -3   2   7 156.100 45.2655   7
   3   2  -6 86.5979 28.4485   3
  -3  -2   6 34.1929 43.0645   1
  -3   2   6 144.834 34.5682   1
  -3   2   6 137.505 41.0193   7
  -3  -2   6 193.717 40.6045   7
  -3   2   5 397.433 48.5268   1
  -3   2   5 454.739 49.8478   7
   3   2  -5 497.760 46.3626   3
  -3  -2   5 353.229 50.4358   1
  -3  -2   5 547.456 52.8397   7
   3   2  -4 62.5964 23.5499   3
  -3  -2   4 78.3129 35.7517   7
  -3   2   4 20.1084 34.5690   7
  -3   2   4 36.4443 35.0696   1
  -3  -2   3 596.847 62.1605   1
  -3   2   3 658.046 61.3976   1
  -3  -2   3 760.813 56.1082   7
   3   2  -3 573.915 48.5429   3
  -3   2   3 625.122 59.3323   7
  -3  -2   2 343.187 50.4559   1
  -3   2   2 398.024 52.0621   1
  -3  -2   2 323.799 36.7273   7
  -3   2   2 325.423 46.4619   7
   3   2  -1 188.958 38.3989   5
  -3  -2   1 162.628 44.2724   1
  -3  -2   1 139.066 26.9345   7
  -3   2   1 153.508 42.7876   7
   3   2   0 83.2569 26.7505   5
  -3  -2   0 89.4096 25.6450   7
  -3   2   0 118.387 40.8089   7
  -3  -2   0 77.2641 42.7615   1
  -3   2  -1 158.639 41.1867   1
   3   2   1 89.2682 25.0029   5
  -3  -2  -1 69.3766 40.9939   1
  -3  -2  -1 207.640 27.3017   7
  -3   2  -1 167.867 39.8515   7
  -3  -2  -2 51.9523 35.6974   1
   3  -2   2 49.6803 18.7447   5
  -3   2  -2 92.3312 34.4138   7
  -3  -2  -3 822.940 70.6693   1
  -3   2  -3 856.067 69.1050   7
  -3  -2  -3 753.583 65.9865   7
  -3   2  -3 784.691 66.2600   3
   3   2   3 770.521 65.7631   6
   3  -2   4 26.5039 34.7962   2
   3   2   4 11.0652 18.9894   6
   3  -2   5 311.150 41.9409   2
   3  -2   6 86.4685 35.4846   2
  -3   2  -6-10.2293 48.6147   3
  -3   2  -7-179.412 52.2959   3
   3  -2   7 70.9685 36.0086   2
   3  -2   8 53.0728 36.4679   2
  -3   2  -9 126.744 51.0406   3
   3  -2   9-15.9854 36.4697   2
  -3   2 -10-22.6944 51.1729   3
   3  -2  10-0.60880 34.3675   2
  -3   3  11 123.076 41.1091   7
   3   3 -10-50.7087 57.5565   5
  -3  -3  10-15.1365 41.3369   7
  -3   3  10 76.0030 43.7050   7
   3   3  -9 349.252 71.7600   5
  -3  -3   9 374.625 47.8945   7
  -3   3   9 390.323 54.0635   7
   3   3  -8 37.6174 62.1696   5
  -3  -3   8 31.7362 37.1195   7
  -3   3   8-11.2630 45.2358   7
   3   3  -7 496.239 64.9213   5
  -3  -3   7 345.036 45.0993   7
  -3   3   7 465.337 56.2962   7
   3   3  -6 54.0788 28.8323   3
  -3  -3   6 24.1379 41.4960   1
  -3   3   6 87.3366 34.8483   1
  -3  -3   6 91.6482 37.0052   7
  -3   3   6 46.4916 41.9493   7
   3   3  -5 64.0266 31.2897   3
  -3  -3   5 52.5473 33.6204   7
  -3   3   5 65.1116 33.1738   7
  -3   3   5 89.2439 32.9027   1
  -3  -3   4 185.037 41.5362   1
  -3   3   4 158.261 37.5439   7
  -3   3   4 206.136 36.7848   1
   3   3  -4 231.160 31.4744   3
  -3   3   3 593.277 59.9558   1
  -3  -3   3 681.158 52.0318   7
   3   3  -3 540.159 46.4648   3
  -3   3   3 478.405 56.4848   7
  -3  -3   3 479.285 58.6239   1
  -3  -3   2 34.5840 41.5232   1
  -3  -3   2 29.4264 22.8718   7
   3   3  -2 20.7875 11.3293   3
  -3   3   2 9.56062 39.7000   7
  -3   3   2 49.8696 43.2338   1
   3   3  -1 283.790 36.9927   5
  -3   3   1 248.466 49.1362   1
  -3  -3   1 236.540 45.5748   1
  -3  -3   1 193.326 26.9889   7
  -3   3   1 237.998 48.4702   7
   3   3   0 32.3159 26.4276   5
  -3  -3   0 56.3512 21.7748   7
  -3  -3   0 117.977 43.5603   1
  -3   3   0 114.045 41.4068   7
   3   3   1 208.015 29.8078   5
  -3  -3  -1 216.619 45.2029   1
  -3  -3  -1 214.645 25.9580   7
  -3   3  -1 263.019 44.0219   7
  -3   3  -1 114.554 42.6830   1
   3  -3   2 119.493 22.0105   5
  -3  -3  -2 132.025 39.9013   1
  -3  -3  -2 117.261 24.9383   7
  -3   3  -2 172.664 37.8504   7
   3   3   3 300.046 34.9234   6
  -3  -3  -3 284.785 40.3650   1
  -3  -3  -3 289.230 33.4499   7
  -3   3  -3 365.428 34.2161   3
  -3   3  -3 339.580 42.5821   7
  -3   3  -4 45.7818 28.0807   3
  -3   3  -4 9.81056 34.0369   7
   3   3   4 55.3065 21.7424   6
  -3  -3  -4-6.11210 23.9818   1
  -3   3  -5 52.5305 35.7550   3
   3  -3   5 54.3538 37.4908   2
  -3   3  -6-14.1973 41.9757   3
  -3  -3  -6 34.7505 16.8025   1
   3  -3   6 47.3278 37.5145   2
  -3  -3  -7 167.021 21.2446   1
  -3   3  -7 133.109 50.3948   3
   3  -3   7 219.047 42.2699   2
  -3   3  -8 78.1482 54.5448   3
   3  -3   8-51.9965 41.1775   2
  -3   3  -9 152.807 58.1368   3
   3  -3   9 89.6158 46.4220   2
  -3   3 -10 18.6364 51.0968   3
   3  -3  10 30.8660 43.1750   2
   3   4 -10-14.8150 48.5937   5
  -3   4  10-3.47935 44.1839   7
   3   4  -9 27.9252 57.4301   5
  -3  -4   9 29.3291 38.7185   7
  -3   4   9 33.5476 45.6545   7
   3   4  -8 120.143 34.9076   3
   3   4  -8 183.351 55.5937   5
  -3  -4   8 196.710 38.6484   7
  -3   4   8 263.031 49.4885   7
   3   4  -7 51.1454 30.8898   3
   3   4  -7-32.7723 46.9300   5
  -3  -4   7 37.2531 31.7641   7
  -3   4   7-35.4149 45.4236   7
   3   4  -6 160.461 31.4217   3
   3   4  -6 63.8054 44.7456   5
  -3   4   6 108.451 35.3160   1
  -3  -4   6 62.5270 29.9943   7
  -3   4   6 66.3765 41.6240   7
   3   4  -5 420.698 53.2756   5
  -3  -4   5 398.063 41.3994   7
  -3   4   5 340.505 47.2894   7
   3   4  -5 443.531 44.3461   3
  -3   4   5 318.985 42.7073   1
  -3   4   4 13.6023 30.6527   1
   3   4  -4 38.3511 39.1442   5
  -3  -4   4-5.75298 25.2903   7
  -3  -4   4 0.35791 34.9500   1
  -3   4   4 45.7141 38.3643   7
   3   4  -4 0.32985 27.2997   3
   3   4  -3 1540.23 118.435   5
  -3  -4   3 1376.85 117.480   1
  -3   4   3 1118.47 117.329   1
  -3  -4   3 1495.68 113.657   7
   3   4  -3 1532.04 113.174   3
  -3   4   3 1228.45 118.709   7
  -3  -4   2 238.892 49.0483   1
   3   4  -2 309.848 35.0871   3
  -3   4   2 258.741 54.9746   7
  -3   4   2 261.833 53.5574   1
   3   4  -1 127.523 32.2109   5
  -3  -4   1 173.924 44.9121   1
   3   4  -1 166.226 20.6318   3
  -3   4   1 126.446 46.1407   1
  -3   4   1 126.895 48.9525   7
   3   4   0 197.831 32.4044   5
   3   4   0 283.259 26.4569   3
  -3  -4   0 231.719 48.9960   1
  -3   4   0 236.302 50.0389   7
  -3   4  -1 38.1878 39.0352   7
  -3  -4  -1 41.8171 41.0062   1
  -3  -4  -2 16.4529 37.5487   1
  -3   4  -2 94.7698 40.6112   7
  -3  -4  -3 1724.71 116.867   1
   3  -4   3 1603.02 117.162   2
  -3   4  -3 1637.37 118.374   7
  -3   4  -3 1263.58 113.313   3
   3   4   3 1336.99 114.818   6
  -3  -4  -4 22.9520 23.5198   1
  -3   4  -4-28.7136 25.9224   3
  -3   4  -4 55.0457 35.4910   7
   3   4   4 45.4935 23.2040   6
  -3   4  -5 18.4346 31.9741   3
  -3  -4  -5 75.2541 19.3983   1
  -3   4  -5 83.8973 40.3814   7
  -3  -4  -6-21.2177 16.7038   1
  -3   4  -6-88.3646 41.3563   3
   3  -4   6-39.3481 37.7734   2
  -3   4  -7-131.907 51.2913   3
   3  -4   7-4.76535 44.8268   2
  -3   4  -8 129.087 58.7707   3
   3  -4   8 140.668 49.9748   2
  -3   4  -9 81.2861 55.6383   3
   3  -4   9 16.8941 50.3758   2
   3  -4  10 88.5895 48.1897   2
  -3   4 -10 84.3795 58.2340   3
   3   5 -10 98.9418 50.4208   5
  -3   5  10 88.2995 49.8595   7
   3   5  -9 91.3727 49.0880   5
  -3   5   9 49.3313 49.7855   7
   3   5  -8 31.0068 34.2094   3
   3   5  -8-30.5821 48.9968   5
  -3   5   8 8.46783 48.5156   7
   3   5  -7 13.0255 30.6820   3
   3   5  -7 2.74485 40.8622   5
  -3  -5   7-12.2388 27.9233   7
  -3   5   7 81.8719 48.0133   7
   3   5  -6 59.2157 32.1733   3
   3   5  -6 87.0772 37.2614   5
  -3   5   6 51.8769 34.5965   1
  -3  -5   6 73.1577 25.2381   7
  -3   5   6 82.3330 40.8129   7
   3   5  -5 55.9174 31.2386   3
   3   5  -5 21.4140 36.6537   5
  -3  -5   5-0.69100 40.5788   1
  -3  -5   5-1.20876 21.1999   7
  -3   5   5 65.2227 36.0138   7
  -3   5   5 94.1659 30.5618   1
  -3   5   4 352.023 45.6631   1
   3   5  -4 471.602 50.3166   5
   3   5  -4 485.283 44.3754   3
  -3  -5   4 412.967 51.0634   1
  -3   5   4 371.698 49.9348   7
   3   5  -3 339.445 45.6059   5
  -3   5   3 370.147 44.2106   1
  -3   5   3 397.442 51.8660   7
  -3  -5   3 354.507 45.4910   1
   3   5  -3 301.786 35.7640   3
   3   5  -2 495.149 42.0290   3
  -3   5   2 410.481 59.0089   7
  -3   5   2 477.348 55.4771   1
  -3  -5   2 413.472 54.0784   1
   3   5  -1 126.171 32.6067   5
  -3  -5   1 153.338 44.3178   1
  -3   5   1 186.186 46.1823   1
   3   5  -1 135.816 22.7643   3
  -3   5   1 134.776 49.3226   7
   3   5   0 5.09453 28.2873   5
  -3  -5   0 7.48112 42.7318   1
   3   5   0 17.7820 22.8143   3
  -3   5   0 9.89110 37.5770   1
  -3   5   0 34.6974 46.1976   7
   3   5   1 26.0899 22.3937   3
  -3  -5  -1 49.9948 45.8491   1
  -3   5  -1 40.5126 44.7021   7
  -3  -5  -2 738.782 67.2881   1
   3  -5   2 618.294 60.2460   2
  -3   5  -2 641.377 66.8135   7
   3   5   3 174.720 31.1107   6
  -3  -5  -3 225.812 36.6506   1
   3  -5   3 233.738 36.2640   2
  -3   5  -3 239.286 39.4774   7
  -3   5  -4 325.967 37.3692   3
  -3  -5  -4 351.321 37.2850   1
  -3   5  -4 415.213 46.0386   7
   3   5   4 348.368 38.5694   6
  -3   5  -5-53.5522 31.6805   3
  -3   5  -5-56.5842 38.0594   7
  -3  -5  -5-50.1304 17.9202   1
  -3  -5  -6 0.10811 15.0955   1
  -3   5  -6-9.66605 41.8415   3
   3  -5   6 53.9416 40.9082   2
  -3   5  -6 10.7522 45.5319   7
  -3   5  -7 85.9250 51.6026   3
   3  -5   7 1.02764 47.0813   2
  -3   5  -8-45.2517 61.1168   3
   3  -5   8-42.6536 53.4026   2
  -3   5  -9 58.4464 62.3594   3
   3  -5   9 31.8451 56.2383   2
  -3   5 -10 744.499 63.6319   3
   3  -5  10-26.0210 59.6262   2
  -3   6  10 21.2478 49.1102   7
   3   6  -9 16.2796 44.4822   5
  -3   6   9 90.5656 47.8850   7
   3   6  -8 252.454 40.9803   3
   3   6  -8 255.119 49.9186   5
   3   6  -7 30.0228 31.6958   3
   3   6  -7-25.5013 36.5729   5
  -3   6   7-62.7726 42.1119   7
   3   6  -6 114.734 33.3256   3
   3   6  -6 56.9271 33.3504   5
  -3   6   6 31.3473 38.7289   7
  -3   6   6 88.8951 32.9904   1
   3   6  -5 94.9734 32.6264   3
   3   6  -5 79.8025 30.6532   5
  -3  -6   5 51.8895 47.0929   1
  -3   6   5 53.8363 40.8948   7
  -3   6   5 7.11895 29.8045   1
  -3   6   4 168.384 31.9060   1
   3   6  -4 53.5110 33.3849   5
  -3  -6   4 64.1466 42.8827   1
  -3   6   4 146.651 43.0471   7
   3   6  -4 58.2911 32.3826   3
   3   6  -3 231.565 38.5169   5
  -3   6   3 86.1622 38.4760   1
  -3   6   3 105.964 46.8861   7
   3   6  -3 171.180 32.6977   3
  -3  -6   2 893.659 83.0744   1
  -3   6   2 973.991 85.1537   1
   3   6  -2 949.956 78.0646   3
  -3   6   2 1058.82 89.2615   7
   3   6  -1 45.3511 28.8016   5
   3   6  -1 26.3168 22.6386   3
  -3   6   1 71.0096 43.4848   1
  -3   6   1 82.4438 48.6936   7
  -3  -6   1 129.769 42.3780   1
  -3  -6   0 1370.14 111.870   1
  -3   6   0 1164.90 110.074   1
   3   6   0 1352.50 106.192   3
  -3   6   0 1410.98 114.031   7
  -3  -6  -1 545.419 61.0037   1
   3   6   1 541.425 51.3886   3
  -3   6  -1 614.023 62.6850   7
  -3  -6  -2 2623.54 176.272   1
   3   6   2 2004.07 172.874   3
   3  -6   2 2140.04 173.810   2
  -3   6  -2 2534.19 176.781   7
   3   6   2 2039.54 174.431   6
   3   6   3 8.44343 30.1593   6
  -3   6  -3 112.401 24.5685   3
   3  -6   3 21.0020 33.5545   2
  -3   6  -3 5.70012 41.7885   7
  -3  -6  -3 72.4740 33.7127   1
  -3   6  -4 146.690 27.4317   3
  -3  -6  -4 83.0163 27.0037   1
   3  -6   4 155.946 35.1112   2
  -3   6  -4 153.576 42.8870   7
   3   6   4 103.008 29.0059   6
  -3   6  -5 51.3608 29.3833   3
   3  -6   5 40.1342 36.1943   2
  -3   6  -5 41.6357 37.8659   7
  -3   6  -6 299.753 43.7086   3
  -3   6  -6 100.404 47.9836   7
  -3   6  -7 101.043 49.6353   3
   3  -6   7-17.1994 46.9321   2
  -3   6  -7-39.6387 49.1987   7
  -3   6  -8-15.0684 58.2906   3
  -3   6  -8-68.1160 47.4459   7
  -3   6  -9 51.1490 60.4060   3
   3  -6   9 20.4882 61.8560   2
  -3   6  -9-105.139 48.2996   7
   3  -6  10-10.3074 59.2261   2
  -3   6 -10-100.342 46.5469   7
  -3   7  10 84.5471 48.1858   7
   3   7  -9 181.941 46.2039   5
  -3   7   9 251.977 51.6839   7
   3   7  -8 48.3993 34.9888   3
   3   7  -8 15.4516 41.5935   5
  -3   7   8 67.7107 55.0042   7
   3   7  -7 105.875 33.3145   3
   3   7  -7 36.9902 34.8120   5
  -3   7   7 96.9415 45.9315   7
   3   7  -6 73.9716 33.2326   3
   3   7  -6 74.4526 31.6207   5
  -3   7   6 58.4525 32.8635   1
  -3   7   6 23.8346 39.2708   7
   3   7  -5 82.6944 30.5701   5
  -3   7   5 26.2537 42.2246   7
  -3   7   5 59.5609 29.2412   1
   3   7  -5 73.1308 32.9920   3
   3   7  -4 507.565 56.0507   5
  -3  -7   4 626.618 63.3014   1
  -3   7   4 579.436 56.1734   1
  -3   7   4 581.757 63.9153   7
   3   7  -4 719.051 57.8682   3
   3   7  -3 65.8262 31.4987   5
  -3   7   3 98.2368 34.1887   1
  -3  -7   3 54.7168 39.7953   1
  -3   7   3 62.4877 45.6416   7
   3   7  -3 69.2973 29.8735   3
  -3  -7   2 146.117 39.7984   1
  -3   7   2 113.599 44.7269   7
   3   7  -2 116.656 27.2355   3
  -3   7   2 159.351 40.3912   1
  -3  -7   1 1261.54 111.833   1
  -3   7   1 1457.48 112.870   1
   3   7  -1 1299.72 107.391   3
  -3   7   1 1446.46 115.546   7
  -3  -7   0 55.2526 38.6460   1
  -3   7   0 24.6920 37.5073   1
   3   7   0 1.22636 26.7900   3
  -3   7   0 2.10568 43.0285   7
  -3  -7  -1 2732.11 220.712   1
   3   7   1 2788.12 218.961   3
  -3   7  -1 2866.05 221.739   7
   3   7   2 243.288 44.2950   6
  -3  -7  -2 388.581 46.1598   4
  -3  -7  -2 329.151 43.8280   1
   3   7   2 337.471 40.4590   3
   3  -7   2 356.614 40.8288   2
  -3   7  -2 388.263 51.4922   7
   3   7   3 181.720 36.2462   6
  -3   7  -3 225.451 30.6798   3
   3  -7   3 191.338 34.9778   2
  -3  -7  -3 235.758 35.4263   1
  -3   7  -3 197.263 45.8584   7
  -3   7  -4 136.726 28.4063   3
   3  -7   4 65.6227 34.7326   2
  -3  -7  -4 46.1209 24.3026   1
  -3   7  -4 94.2333 43.4716   7
   3   7   4 71.8256 31.2443   6
  -3   7  -5 101.669 32.1215   3
   3  -7   5 62.7436 38.2844   2
  -3   7  -5 77.8612 39.7446   7
  -3   7  -6 98.1500 39.7243   3
  -3   7  -6 34.3290 43.7964   7
  -3   7  -7 16.9062 49.0631   3
  -3   7  -7-39.0395 49.2616   7
  -3   7  -8 31.1420 55.6143   3
   3  -7   8-9.41257 54.5521   2
  -3   7  -8-51.5433 47.4944   7
  -3   7  -9-2.06302 54.6445   3
   3  -7   9-45.0500 61.5940   2
  -3   7  -9-46.4871 49.3306   7
  -3   8  10 118.265 48.9297   7
   3   8  -9 0.36630 42.2731   5
  -3   8   9-14.6431 49.5020   7
   3   8  -8 40.4715 35.0339   3
   3   8  -8 77.7157 40.5084   5
  -3   8   8 91.6160 54.9487   7
   3   8  -7 135.023 35.0021   3
   3   8  -7 144.439 35.3126   5
  -3   8   7 135.308 45.7713   7
   3   8  -6 4.46464 33.6637   3
   3   8  -6 15.4263 30.2367   5
  -3   8   6-5.45943 32.1268   1
  -3   8   6 6.79421 38.1726   7
   3   8  -5 442.460 48.4290   5
  -3   8   5 467.947 46.2424   1
   3   8  -5 500.217 49.6311   3
  -3   8   5 411.392 55.5682   7
  -3   8   4 54.8931 28.1668   1
   3   8  -4 11.3560 32.0100   5
  -3  -8   4-48.0648 41.9007   1
   3   8  -4-8.29439 34.2607   3
  -3   8   4 24.3424 39.3121   7
   3   8  -3 608.945 62.1594   5
  -3  -8   3 630.004 66.2594   1
  -3   8   3 668.982 61.8928   1
  -3   8   3 546.316 67.4003   7
  -3   8   2 15.6784 36.7797   1
  -3  -8   2 46.2887 37.6198   1
  -3   8   2-33.7491 46.3495   7
   3   8  -2 13.6713 28.0241   3
   3   8  -1 204.785 30.4090   3
  -3  -8   1 123.079 35.9190   1
  -3   8   1 172.792 49.5333   7
  -3   8   1 173.803 38.4110   1
  -3   8   0 80.3852 38.5378   1
   3   8   0 112.566 27.7238   3
  -3   8   0 106.406 47.8962   7
  -3  -8   0 108.882 38.0383   1
  -3  -8  -1 125.853 37.3930   1
   3   8   1 90.2162 31.2351   3
  -3   8  -1 119.840 48.3156   7
   3   8   2 65.4199 36.2241   6
  -3  -8  -2 132.504 33.9330   1
   3  -8   2 121.351 33.1278   2
   3   8   2 108.086 33.0342   3
  -3   8  -2 81.2322 48.1080   7
  -3  -8  -3 911.761 82.8018   1
   3   8   3 1044.97 84.3218   3
   3  -8   3 950.630 85.1856   2
  -3   8  -3 993.845 89.5040   7
  -3   8  -3 1226.21 81.8643   3
   3   8   3 754.125 83.9286   6
  -3   8  -4 183.812 30.8134   3
   3  -8   4 119.269 37.1704   2
  -3   8  -4 110.107 44.9372   7
   3   8   4 123.609 34.2129   6
  -3   8  -5 272.509 39.2041   3
   3  -8   5 288.442 43.6774   2
  -3   8  -5 213.513 46.1398   7
  -3   8  -6 86.3512 39.1459   3
   3  -8   6-10.8733 41.3685   2
  -3   8  -6 25.4444 45.1925   7
  -3   8  -7 69.1446 51.6257   3
  -3   8  -7 48.8128 48.1951   7
  -3   8  -8 116.739 56.0003   3
   3  -8   8 43.6051 54.4130   2
  -3   8  -8 3.20733 49.5106   7
   3  -8   9 2.51145 58.4158   2
  -3   8  -9-15.6911 50.0965   7
  -3   9   9 85.3525 50.1221   7
   3   9  -8 23.5749 34.9283   3
  -3   9   8-2.53406 49.5053   7
   3   9  -7 59.2095 34.1433   3
   3   9  -7 45.9779 34.0198   5
  -3   9   7 87.3867 43.6221   7
   3   9  -6 88.9032 31.0883   5
  -3   9   6 16.9036 39.5267   7
   3   9  -6 60.9902 34.0575   3
   3   9  -5-6.03750 32.6421   5
  -3   9   5 17.7051 26.8838   1
  -3   9   5 76.3712 39.4799   7
   3   9  -5 34.7549 35.2161   3
  -3   9   4 71.8788 29.1484   1
  -3   9   4 97.5284 44.6682   7
   3   9  -4 146.446 36.8264   3
  -3  -9   3 255.484 48.9995   1
  -3   9   3 327.644 39.5307   1
  -3   9   3 279.676 50.4446   7
   3   9  -3 408.904 44.3414   3
  -3   9   2 141.733 35.7211   1
  -3  -9   2 71.2429 38.2679   1
  -3   9   2 123.088 44.0825   7
   3   9  -2 98.1568 31.6621   3
  -3   9   1 420.052 47.5535   1
   3   9  -1 436.110 45.4050   3
  -3  -9   1 437.779 49.4703   1
  -3   9   1 472.401 56.4177   7
  -3   9   0-4.10169 35.9559   1
   3   9   0-6.01871 27.3510   3
  -3  -9   0 24.1112 33.4111   1
  -3   9   0-4.75814 47.4765   7
   3   9   1 246.401 43.1791   6
   3   9   1 357.603 39.7311   3
  -3   9  -1 304.337 54.0259   7
  -3  -9  -1 251.091 38.6990   1
   3   9   2-21.0507 34.6772   6
   3  -9   2 31.4988 33.2659   2
   3   9   2 34.5081 32.7512   3
  -3   9  -2 45.3308 47.6238   7
  -3  -9  -2-12.6058 27.6982   1
   3   9   3 154.513 41.8415   6
   3   9   3 121.131 38.7708   3
   3  -9   3 140.786 40.2461   2
  -3   9  -4 216.016 33.0269   3
   3  -9   4 177.777 38.5769   2
  -3   9  -4 260.884 48.2715   7
   3   9   4 154.285 37.8450   6
  -3   9  -5 86.8622 33.6934   3
   3  -9   5 118.881 39.7795   2
  -3   9  -5 77.0701 42.1983   7
  -3   9  -6 125.250 41.2259   3
   3  -9   6 47.7766 41.7834   2
  -3   9  -6 1.76904 49.0607   7
  -3   9  -7 160.258 52.2325   3
   3  -9   7 85.3867 45.7526   2
  -3   9  -7 96.5433 48.1691   7
  -3   9  -8 588.001 56.0666   3
  -3   9  -8 21.1857 55.4160   7
   3  -9   9 54.2765 54.6827   2
  -3   9  -9 8.30076 50.6571   7
  -3  10   9-15.2580 51.7408   7
  -3  10   8 17.3674 48.1360   7
   3  10  -8 60.3254 34.4919   3
  -3  10   7 66.7886 47.1552   7
   3  10  -7 20.5173 33.9784   3
  -3  10   6 51.6432 40.6375   7
   3  10  -6 97.3609 34.2861   3
  -3  10   5 84.3138 43.0206   7
   3  10  -5 117.602 37.2121   3
  -3  10   4 12.1980 43.3856   7
   3  10  -4 13.9533 37.2223   3
  -3  10   4 23.4656 26.5059   1
  -3  10   3 190.279 33.2930   1
  -3  10   3 242.629 44.8741   7
   3  10  -3 238.958 41.4110   3
  -3 -10   2 244.122 45.3037   1
  -3  10   2 276.028 51.3546   7
   3  10  -2 307.857 40.1373   3
  -3  10   2 265.961 38.0370   1
  -3 -10   1 46.5820 32.9291   1
   3  10  -1 13.0664 31.4849   3
  -3  10   1-46.4147 42.8682   7
  -3  10   1-8.63710 31.8046   1
  -3  10   0 218.873 38.6517   1
  -3 -10   0 213.021 36.0983   1
   3  10   0 199.541 33.2764   3
  -3  10   0 265.217 51.2946   7
   3  10   1 14.1684 37.2393   6
  -3 -10  -1 16.8374 50.7641   4
   3  10   1-42.9885 30.7979   3
  -3 -10  -1 18.0293 27.8049   1
  -3  10  -1 14.4681 45.2775   7
   3  10   2 347.846 45.1817   6
   3 -10   2 371.996 42.8612   2
   3  10   2 359.913 43.2561   3
  -3 -10  -2 284.381 36.9205   1
  -3  10  -2 367.584 52.5198   7
   3  10   3 246.657 38.1517   3
   3 -10   3 185.348 39.8971   2
  -3  10  -3 312.541 49.8997   7
   3  10   3 190.828 41.8936   6
   3  10   4 71.9525 32.8899   3
   3 -10   4 68.7696 38.6193   2
  -3  10  -4 58.5692 47.9984   7
   3  10   4 89.0590 38.0988   6
  -3  10  -5 97.7825 34.0364   3
   3 -10   5 57.6182 39.6437   2
  -3  10  -5 49.8826 44.9700   7
  -3  10  -6 95.4208 41.2949   3
   3 -10   6 28.7783 41.9300   2
  -3  10  -6 13.9409 48.6256   7
   3 -10   7 28.1935 47.8025   2
  -3  10  -7-29.6895 53.1311   7
   3 -10   8 152.729 50.7382   2
  -3  10  -8 135.190 56.8209   7
  -3  10  -9 1.23860 53.7088   7
  -3 -11   9 50.3742 44.0732   4
  -3  11   9 32.9504 53.2125   7
  -3  11   8-18.1274 48.9573   7
  -3  11   7 3.89372 45.6101   7
   3  11  -7 21.8780 33.9344   3
  -3  11   6 119.658 44.2403   7
   3  11  -6 177.274 36.0653   3
  -3  11   5 32.1707 42.8102   7
   3  11  -5-15.5341 36.3868   3
  -3  11   4 825.927 96.1776   7
   3  11  -4 1292.81 94.0211   3
  -3  11   3 56.3912 27.0986   1
  -3  11   3 34.9769 44.9758   7
   3  11  -3-13.7226 37.6553   3
   3  11  -2 492.630 49.4959   3
  -3  11   2 376.097 55.4230   7
  -3  11   2 401.492 45.5050   1
  -3 -11   1 34.3860 38.0019   1
   3  11  -1 41.8098 34.0135   3
  -3  11   1 24.6403 32.1651   1
  -3  11   1 13.4321 44.9607   7
  -3  11   0-30.7528 29.8726   1
   3  11   0-31.6382 37.3741   6
  -3 -11   0 51.6353 64.3828   4
  -3 -11   0 16.7735 31.5594   1
   3  11   0 26.6524 30.3255   3
  -3  11   0-8.93109 44.6570   7
   3  11   1 79.6501 39.6939   6
  -3 -11  -1 100.235 47.7520   4
  -3 -11  -1 15.5619 28.4830   1
   3  11   1 94.2980 32.8238   3
  -3  11  -1 11.9278 49.6555   7
   3  11   2 128.528 43.2036   6
   3 -11   2 219.661 36.0108   2
   3  11   2 134.396 35.9376   3
  -3  11  -2 217.951 49.3621   7
   3  11   3 24.1055 35.0576   3
   3 -11   3 58.0225 35.5300   2
  -3  11  -3 43.8993 45.6906   7
   3  11   3 44.7315 41.6940   6
   3  11   4 547.125 58.1645   3
   3 -11   4 632.070 60.8037   2
   3  11   4 507.270 63.8332   6
   3 -11   5 54.8657 39.8476   2
  -3  11  -5 118.423 48.2038   7
   3 -11   6 158.802 43.5415   2
  -3  11  -6 168.518 51.5778   7
   3 -11   7 77.3934 43.4852   2
  -3  11  -7 100.859 56.8987   7
   3 -11   8 50.1020 46.4617   2
  -3  11  -8 23.2896 59.6097   7
  -3 -12   8 28.0296 44.2666   4
   3  12  -7-1.45646 34.3056   3
  -3  12   6 49.6288 42.6988   7
   3  12  -6 23.4493 35.1132   3
  -3  12   5 65.0292 42.5987   7
   3  12  -5 132.059 39.5772   3
  -3  12   4 11.1951 41.2257   7
   3  12  -4-3.05917 38.0330   3
  -3  12   3 79.4988 27.7967   1
  -3  12   3 86.6851 44.1497   7
   3  12  -3 119.378 39.9555   3
  -3 -12   2 451.053 62.9383   4
  -3  12   2 218.805 51.3703   7
   3  12  -2 404.356 45.4001   3
  -3  12   2 275.114 37.8549   1
  -3 -12   1 11.9427 64.4088   4
  -3  12   1 16.7049 30.7630   1
   3  12  -1-14.9467 35.8085   3
  -3  12   1-8.52628 45.2869   7
   3  12   0 206.964 41.6368   6
  -3 -12   0 176.710 59.4843   4
  -3 -12   0 99.1304 38.7672   1
   3  12   0 209.041 35.5377   3
  -3  12   0 229.968 51.7583   7
  -3  12   0 132.238 34.5137   1
   3  12   1-2.48645 41.0867   6
  -3 -12  -1-29.3480 50.7048   4
   3  12   1-1.70810 32.5898   3
  -3  12  -1-30.5975 49.2420   7
   3  12   2 273.859 44.2367   6
   3 -12   2 258.654 40.5711   2
   3  12   2 282.093 40.9000   3
  -3  12  -2 254.502 54.1676   7
   3  12   3 73.8554 35.7151   3
   3 -12   3 109.838 38.9091   2
  -3  12  -3 81.5265 46.1495   7
   3  12   3 32.6383 42.7371   6
   3  12   4 158.006 34.6823   3
   3 -12   4 21.3450 40.4263   2
  -3  12  -4 72.6271 45.9509   7
   3  12   4 153.283 42.1211   6
   3 -12   5 142.132 44.3895   2
  -3  12  -5 288.767 51.3400   7
   3 -12   6 60.1225 43.5932   2
  -3  12  -6 66.8060 52.2698   7
   3 -12   7 35.3613 42.7944   2
  -3  12  -7 116.771 54.2729   7
   3 -12   8 49.7225 45.6281   2
  -3  12  -8 64.0378 59.7223   7
  -3 -13   8-78.2713 45.1558   4
   3  13  -7 58.0837 33.9200   3
  -3 -13   6-12.1697 43.7084   4
   3  13  -6-32.6410 37.5281   3
  -3 -13   5 58.9618 45.0473   4
   3  13  -5 9.71391 35.8448   3
  -3 -13   4 185.052 48.7394   4
   3  13  -4 90.1983 41.6669   3
  -3 -13   3 45.0010 51.2528   4
   3  13  -3 74.0405 41.3958   3
   3  13  -2 52.7660 39.2902   6
  -3 -13   2-4.80460 58.3238   4
  -3  13   2 26.7253 27.4263   1
   3  13  -2 64.0864 39.2158   3
  -3 -13   1 278.078 66.5868   4
  -3  13   1 115.137 31.8982   1
   3  13  -1 216.275 40.0806   3
   3  13   0 3.83326 41.5059   6
  -3 -13   0 25.8205 57.4476   4
  -3  13   0 45.8908 30.2403   1
   3  13   0-10.2807 34.1108   3
   3  13   1 201.155 43.0917   6
   3  13   1 208.213 39.1085   3
  -3  13  -1 129.366 38.0729   1
   3 -13   2 65.6018 35.3690   2
   3  13   2 62.9483 36.9613   3
  -3  13  -2 71.9904 49.5635   7
   3  13   2 37.0028 42.5851   6
   3  13   3 103.215 38.9901   3
   3 -13   3 50.8980 39.7641   2
  -3  13  -3 119.138 46.0270   7
   3  13   3 93.7286 43.2280   6
   3  13   4 72.7661 34.2101   3
   3 -13   4 80.9229 41.6766   2
  -3  13  -4 105.681 49.1399   7
   3 -13   5 38.8897 42.6848   2
  -3  13  -5 96.0375 48.2522   7
   3 -13   6 27.9655 44.2055   2
  -3  13  -6 63.4198 51.1201   7
   3 -13   7 72.8417 43.8184   2
  -3  13  -7 73.4085 59.8286   7
   3 -13   8-45.1817 41.7049   2
  -3  13  -8-42.3258 63.3637   7
  -3 -14   8 54.4244 42.3281   4
  -3  14   8 17.8344 50.4610   7
   3  14  -7 26.7248 41.7153   6
  -3  14   7 20.8404 46.0107   7
   3  14  -7 27.2879 33.0441   3
   3  14  -6 137.448 42.2982   6
  -3 -14   6 81.5268 45.3173   4
   3  14  -6 129.282 38.0362   3
   3  14  -5 343.803 49.6962   6
  -3 -14   5 334.531 55.8768   4
   3  14  -5 459.787 51.0877   3
   3  14  -4 63.2199 40.4774   6
  -3 -14   4-12.1178 47.5663   4
   3  14  -4-22.4814 41.0093   3
   3  14  -3 294.292 48.6923   6
  -3 -14   3 228.592 58.7033   4
   3  14  -3 373.027 48.4811   3
   3  14  -2-7.12635 41.4196   6
  -3 -14   2-3.06912 57.5622   4
   3  14  -2 1.68146 39.8085   3
   3  14  -1 33.0099 40.7844   6
  -3 -14   1 77.9923 65.0496   4
  -3  14   1 49.1259 29.9226   1
   3  14  -1 77.0729 37.4231   3
  -3 -14   0 52.6720 61.3051   4
  -3  14   0 23.3062 29.5913   1
   3  14   0-18.6442 36.7573   3
   3  14   1 53.0515 40.5565   6
  -3 -14  -1 77.3176 52.9238   4
  -3  14  -1-42.8204 31.4674   1
   3  14   1-6.80431 36.1328   3
   3  14   2 6.61692 38.3262   3
   3  14   2 49.9856 43.4962   6
   3 -14   3 303.038 44.3632   2
   3  14   3 251.130 42.4386   3
   3  14   3 247.567 49.9917   6
   3  14   4 10.9463 37.6391   3
   3 -14   4 5.14617 41.5066   2
   3 -14   5 268.673 49.1196   2
   3 -14   6 74.6221 44.6351   2
   3 -14   7 48.0223 42.9849   2
   3  15  -7 47.3161 39.6756   6
  -3  15   7 32.2260 49.1025   7
   3  15  -6 64.3207 41.6063   6
  -3 -15   6 82.2135 42.2518   4
  -3  15   6 74.6855 43.3426   7
   3  15  -6 40.5347 35.2138   3
   3  15  -5 20.3893 40.8248   6
  -3 -15   5 61.3470 45.2227   4
  -3  15   5 23.5788 45.6947   7
   3  15  -5 48.6267 37.4699   3
   3  15  -4 159.586 42.2766   6
  -3 -15   4 177.413 50.5378   4
  -3  15   4 45.0062 43.8451   7
   3  15  -4 98.0160 41.5380   3
   3  15  -3 40.6081 39.7189   6
  -3 -15   3-10.6596 53.2793   4
  -3  15   3 24.5789 48.1124   7
   3  15  -3 88.9373 40.4392   3
   3  15  -2 125.253 42.5751   6
  -3 -15   2 129.103 61.0086   4
  -3  15   2 146.094 51.4170   7
   3  15  -2 169.602 44.1499   3
   3  15  -1 74.8048 42.7857   6
   3  15  -1 127.105 38.4038   3
  -3  15   1 23.0640 50.4092   7
  -3  15   0 19.7815 28.4439   1
  -3 -15   0 19.2901 68.0389   4
   3  15   0 20.2181 36.5255   3
   3  15   1 132.031 41.4908   3
  -3  15  -1 47.7542 34.0834   1
   3  15   1 72.2725 42.5247   6
   3  15   2 47.8317 40.9560   3
   3  15   2 50.1358 44.8933   6
   3 -15   3 58.9950 36.0178   2
   3  15   3 42.3630 37.0200   3
   3  15   3 31.8056 49.7877   6
   3  15   4 134.678 38.8506   3
   3 -15   4 104.048 41.9579   2
   3 -15   5 85.5646 43.6649   2
   3 -15   6 17.1890 42.9837   2
   3 -15   7 87.1370 43.6144   2
   3  16  -6 138.029 41.8432   6
  -3 -16   6 118.067 43.2594   4
  -3  16   6 91.6614 44.0645   7
   3  16  -6 126.042 39.0225   3
   3  16  -5 31.6271 40.0054   6
  -3 -16   5 94.6693 45.5047   4
  -3  16   5 20.1248 46.7960   7
   3  16  -5-15.7624 39.0295   3
   3  16  -4 80.2660 40.8131   6
  -3 -16   4 94.6011 49.5559   4
  -3  16   4 44.9327 44.6676   7
   3  16  -4 46.6983 37.2780   3
   3  16  -3-15.2876 41.9051   6
  -3 -16   3-8.94194 55.6219   4
  -3  16   3-32.3738 45.7021   7
   3  16  -3-33.2127 39.8154   3
   3  16  -2 155.012 46.7243   6
  -3 -16   2 131.635 65.5030   4
  -3  16   2 64.9137 48.9125   7
   3  16  -2 124.521 41.4431   3
   3  16  -1 28.2866 40.8291   6
  -3 -16   1 31.8464 67.3448   4
   3  16  -1 36.0411 40.9191   3
  -3  16   1 25.5779 49.2491   7
  -3 -16   0 281.507 71.8922   4
   3  16   0 185.875 40.8989   3
  -3  16   0 150.026 54.9633   7
  -3  16  -1-26.9464 31.8344   1
   3  16   1-26.5008 39.5569   3
  -3  16  -1 53.6869 50.1776   7
   3  16   1 25.7700 45.2003   6
   3  16   2 214.355 42.9767   3
  -3  16  -2 258.306 53.9571   7
   3  16   2 159.656 51.7921   6
   3 -16   3 67.5812 33.6131   2
   3  16   3-5.15173 38.6914   3
  -3  16  -3 0.98242 47.7285   7
   3  16   4 25.6188 37.9638   3
   3 -16   4 54.1323 39.4846   2
  -3  16  -4 24.9407 48.5315   7
   3 -16   5 28.0865 43.2864   2
  -3  16  -5-18.8295 49.0679   7
   3 -16   6 167.968 46.2054   2
  -3  16  -6 314.495 56.8262   7
   3  17  -6 369.734 49.2324   6
  -3 -17   6 322.266 50.6173   4
  -3  17   6 297.303 52.8224   7
   3  17  -6 386.728 46.6999   3
   3  17  -5 43.0594 41.1383   6
  -3 -17   5 9.02851 44.5140   4
  -3  17   5 63.7013 44.7086   7
   3  17  -5-34.2942 34.5448   3
   3  17  -4 121.670 44.5070   6
  -3 -17   4 77.5793 49.5818   4
  -3  17   4 146.934 48.6469   7
   3  17  -4 67.2603 40.3704   3
   3  17  -3 91.1001 42.2591   6
  -3 -17   3 62.1684 56.7821   4
  -3  17   3 18.1134 48.9504   7
   3  17  -3 77.9781 40.8851   3
   3  17  -2 4.50640 41.6549   6
  -3 -17   2-29.4037 65.2455   4
  -3  17   2 15.0331 51.0054   7
   3  17  -2 37.7580 43.0385   3
   3  17  -1 65.2600 45.9733   6
   3  17  -1 77.1397 41.4870   3
  -3  17   1 76.3868 52.1760   7
  -3 -17   0 51.5761 70.6230   4
   3  17   0-1.90644 40.1161   3
  -3  17   0 53.6715 53.1490   7
   3  17   1 86.8162 43.8036   3
  -3  17  -1 144.033 52.3992   7
   3  17   1 79.3205 49.2327   6
   3  17   2 66.9810 45.1455   3
  -3  17  -2-34.4170 32.4517   1
  -3  17  -2 43.4171 50.7010   7
   3  17   2 40.1268 48.7899   6
   3  17   3 45.7032 44.6846   3
  -3  17  -3 97.1683 49.3605   7
   3  17   4 215.997 44.9263   3
   3 -17   4 150.754 40.6388   2
  -3  17  -4 233.099 52.5355   7
   3 -17   5 13.9272 39.9349   2
  -3  17  -5 94.7818 51.2961   7
   3  18  -5 63.9258 40.6329   6
  -3 -18   5 73.2957 44.0960   4
  -3  18   5 75.7504 42.9597   7
   3  18  -5 40.8910 37.5548   3
   3  18  -4 21.4864 40.6040   6
  -3 -18   4 14.2449 49.4965   4
  -3  18   4 69.7298 43.8560   7
   3  18  -4 19.4854 38.8114   3
   3  18  -3 27.3773 42.4383   6
  -3 -18   3 68.3598 59.8822   4
  -3  18   3 55.6562 44.6641   7
   3  18  -3 2.30431 42.3272   3
   3  18  -2 55.2801 44.6798   6
  -3 -18   2 32.9524 69.1413   4
  -3  18   2 38.5833 48.7519   7
   3  18  -2-43.0525 41.2242   3
  -3 -18   1 55.2367 77.0394   4
   3  18  -1 35.2692 40.0640   3
  -3  18   1 21.3345 50.4471   7
   3  18  -1 30.8716 46.7863   6
   3  18   0 103.795 43.7646   3
  -3  18   0 39.5841 53.9052   7
   3  18   1-9.40727 43.1883   3
  -3  18  -1-35.2436 53.0385   7
   3  18   1-14.1021 47.4022   6
   3  18   2 44.5679 46.2067   3
  -3  18  -2 60.6252 49.4058   7
   3  18   3 73.7226 42.2325   3
  -3  18  -3 0.34185 49.6004   7
   3  18   4 34.9917 39.8642   3
  -3  18  -4-18.2810 47.2444   7
  -3 -19   3-24.1079 58.3374   4
  -3  19   3-22.4588 42.6697   7
   3  19  -3-31.1623 40.9164   3
   3  19  -3 46.7249 43.3065   6
  -3 -19   2 183.893 70.9896   4
  -3  19   2 162.705 47.6799   7
   3  19  -2 105.797 41.1829   3
   3  19  -2 103.945 46.6941   6
  -3 -19   1 185.571 88.8023   4
   3  19  -1 67.9279 37.3121   3
  -3  19   1 91.1594 46.9651   7
   3  19  -1 61.9347 47.0492   6
   3  19   0 14.4264 40.2512   3
  -3  19   0 6.92476 48.5474   7
   3  19   1 97.6750 41.8107   3
  -3  19  -1-58.0467 48.3044   7
   3  19   1 7.06059 49.6399   6
   3  19   2 25.3976 45.4030   3
  -3  19  -2 89.8408 47.1676   7
   3  19   3 30.4036 41.4615   3
  -3  19  -3 30.2999 45.3050   7
  -3 -20   1 82.3313 85.4049   4
   3  20  -1 72.2183 36.8488   3
  -3  20   1 5.23955 43.9512   7
   3  20  -1 15.3224 47.0669   6
   3  20   0 81.5658 42.9831   3
  -3  20   0 53.3249 46.4652   7
   3  20   0 16.2457 50.1600   6
   3  20   1 14.8213 42.8817   3
  -3  20  -1 37.5164 47.6057   7
   4   0  -9-64.2743 90.3135   5
  -4   0   8 102.752 45.7510   7
  -4   0   7 20.0671 42.8968   7
  -4   0   6 10.5520 39.6095   1
  -4   0   6 82.5484 45.3913   7
  -4   0   5-26.9640 40.7039   7
  -4   0   5-39.1310 38.3481   1
  -4   0   4 21.0350 34.0975   7
  -4   0   4 14.1215 42.0456   1
  -4   0   3 4.97746 29.9600   7
  -4   0   2 57.9923 29.2414   7
   4   0  -1-4.06782 37.8204   5
  -4   0   1 42.1721 47.4241   1
  -4   0   1-13.8631 29.0842   7
   4   0   0 212.898 31.7058   5
  -4   0   0 109.561 32.7580   7
  -4   0   0 106.885 48.2054   1
   4   0   1 25.3024 23.5124   5
  -4   0  -1 64.9134 47.8198   1
  -4   0  -1 50.7329 30.6923   7
  -4   0  -2 95.5990 42.5468   1
  -4   0  -2 111.672 31.1397   7
  -4   0  -3-1.09988 38.4899   1
  -4   0  -3 154.993 29.8652   7
  -4   0  -4 26.3114 35.1142   1
  -4   0  -4-72.4726 27.9540   7
  -4   0  -5 132.268 26.2638   7
  -4   0  -5-30.7512 33.8395   1
  -4   0  -6-7.41059 28.2619   1
  -4   0  -7-36.4315 28.2277   1
  -4   0  -8-54.2367 23.9217   1
   4   1  -9 104.355 80.8246   5
  -4   1   9 83.9943 44.6485   7
   4   1  -8-8.37501 87.4881   5
  -4   1   8-32.6643 45.9353   7
   4   1  -7-6.79239 80.9746   5
  -4   1   7-44.7179 43.6600   1
  -4   1   7 7.04892 47.0293   7
  -4  -1   6 5.58812 43.1862   1
  -4   1   6 36.7056 39.5882   1
  -4   1   6 10.7083 47.9843   7
  -4  -1   5 53.1772 43.3856   7
  -4   1   5 14.6905 39.5663   7
  -4  -1   5 1.01303 41.7334   1
  -4   1   5-11.5584 37.4834   1
  -4  -1   4 158.553 37.7313   7
  -4   1   4 168.497 35.8842   7
  -4   1   4 191.521 46.7772   1
  -4   1   3-0.26517 49.3845   1
   4   1  -3-2.86991 56.1393   5
  -4   1   3-7.70809 32.5464   7
   4   1  -2 1.77619 43.5644   5
  -4  -1   2 43.8473 47.8438   1
  -4   1   2-13.6358 31.5299   7
   4   1  -1 7.34296 34.2459   5
  -4  -1   1-45.6019 46.3730   1
  -4   1   1-2.86658 32.6738   7
  -4   1   0 57.8035 47.9742   1
   4   1   0-7.57194 27.1882   5
   4  -1   0 2.05597 29.3072   5
  -4   1   0-6.13660 34.6412   7
  -4  -1   0 32.4748 44.7506   1
  -4  -1  -1 100.416 46.3010   1
   4   1   1 112.366 26.1612   5
   4  -1   1 108.401 25.9410   5
  -4   1  -1 101.550 44.7259   1
  -4   1  -1 190.467 35.2381   7
   4  -1   2-10.3786 23.0934   5
  -4  -1  -2 41.2504 40.6976   1
  -4   1  -2 60.9126 32.2766   7
  -4   1  -2 42.9812 41.4516   1
  -4   1  -3 60.8139 40.2924   1
  -4  -1  -3 21.8421 37.6175   1
  -4   1  -3 81.1736 31.3745   7
  -4  -1  -4 1083.77 91.4840   1
  -4   1  -4 1187.76 95.3843   1
  -4   1  -4 1052.68 90.9767   7
  -4  -1  -5 33.4563 26.8677   1
  -4   1  -5-49.5546 38.0479   1
  -4   1  -5-70.7488 28.9665   7
  -4   1  -6 119.894 34.8947   1
  -4  -1  -6 112.734 26.7986   1
  -4   1  -7-28.4491 34.2718   1
  -4  -1  -7 46.5014 21.3998   1
  -4   1  -8-36.0496 30.2356   1
  -4  -1  -8-2.19966 19.6459   1
   4   2  -9-50.9733 72.4268   5
  -4   2   9 4.26051 43.8870   7
   4   2  -8-46.0135 77.0904   5
  -4   2   8 97.4765 45.1026   7
   4   2  -7-67.4947 71.9906   5
  -4   2   7-7.23605 40.9419   1
  -4   2   7-30.4899 47.0244   7
   4   2  -6 37.6307 62.8070   5
  -4  -2   6 41.5424 44.7619   1
  -4   2   6-8.00603 39.1927   1
  -4   2   6 52.0715 45.2461   7
   4   2  -5 102.722 57.1545   5
  -4   2   5 16.7538 39.9161   7
  -4   2   5 43.1988 36.7610   1
  -4   2   4 37.9864 35.1843   7
  -4   2   4 72.5307 43.5096   1
  -4   2   3 271.462 49.4900   1
   4   2  -3 253.275 50.2013   5
  -4   2   3 116.962 38.0398   7
  -4  -2   3 174.563 46.5002   1
  -4  -2   2 48.2398 49.1206   1
   4   2  -2 33.8615 43.2866   5
  -4   2   2 7.28936 51.6035   1
  -4   2   2 12.2632 35.1951   7
   4   2  -1 67.2733 35.4448   5
  -4  -2   1 102.598 49.3841   1
  -4   2   1 97.2815 37.8120   7
   4   2   0 19.9211 25.6293   5
  -4   2   0 40.1107 46.1521   1
   4  -2   0 13.9974 32.4904   5
  -4  -2   0 103.113 46.8042   1
  -4   2   0 16.2813 38.3367   7
   4   2   1 18.6926 23.8443   5
   4  -2   1 1.37343 24.5785   5
  -4   2  -1 18.9041 43.4704   1
  -4   2  -1 59.1549 36.3326   7
  -4  -2  -1 35.4418 46.1010   1
   4  -2   2 72.8855 24.0335   5
  -4   2  -2 106.884 42.5560   1
  -4  -2  -2 61.6476 42.2264   1
  -4   2  -2 75.2815 34.1504   7
  -4  -2  -3 612.336 55.3767   1
  -4   2  -3 502.495 59.4826   1
  -4   2  -3 498.887 52.9860   7
   4   2   3 500.569 48.2715   6
  -4   2  -4 61.5273 43.8721   1
  -4  -2  -4 82.6281 30.0136   1
  -4   2  -4 136.346 34.3845   7
  -4  -2  -5 449.200 47.4599   1
  -4   2  -5 570.443 59.2801   1
  -4   2  -5 534.134 52.2914   7
  -4  -2  -6 91.0304 23.0676   1
  -4   2  -6 138.356 36.2881   7
  -4   2  -7 44.1913 41.4930   1
  -4  -2  -7 76.1747 19.5037   1
  -4   2  -7 148.183 38.8930   7
  -4   2  -8 563.749 60.0367   7
   4   3  -9 136.523 69.2616   5
  -4   3   9 110.010 46.7897   7
   4   3  -8 67.3382 69.1741   5
  -4   3   8 61.6537 50.8558   7
  -4   3   7-7.90849 38.8372   1
  -4   3   7-48.7498 52.8530   7
   4   3  -6 43.3242 59.8378   5
  -4  -3   6-27.5880 44.2443   1
  -4   3   6-0.97158 35.4445   1
  -4   3   6 22.8528 44.3037   7
   4   3  -5 16.5867 55.1749   5
  -4   3   5 24.1777 38.4599   7
  -4   3   5-28.0806 35.7036   1
  -4   3   4 24.3546 38.2226   7
  -4  -3   4 87.8603 42.5177   1
  -4   3   4-4.81457 41.3840   1
   4   3  -3 23.8880 48.7561   5
  -4   3   3 62.0642 50.0974   1
  -4   3   3 29.2901 38.1462   7
  -4  -3   3 57.5544 42.2779   1
  -4  -3   2 55.7918 44.0852   1
   4   3  -2 72.8121 42.1902   5
  -4   3   2 35.1548 51.4089   1
  -4   3   2 69.7061 41.1951   7
   4   3  -1 223.256 37.8138   5
  -4  -3   1 266.210 51.0483   1
  -4   3   1 243.050 45.8569   7
   4   3   0 5.98638 27.7205   5
  -4  -3   0 2.95885 48.6989   1
  -4   3   0 22.7543 39.3078   7
   4  -3   1 47.3592 27.1930   5
  -4  -3  -1 144.161 47.3404   1
  -4   3  -1 118.738 44.3928   1
  -4   3  -1 96.7345 38.6153   7
  -4  -3  -2 82.8394 40.3533   1
   4  -3   2 22.6513 22.7329   5
  -4   3  -2 52.8254 39.2749   1
  -4   3  -2 107.512 36.6598   7
   4   3   3 199.052 31.7474   6
  -4   3  -3 187.231 45.2162   1
  -4  -3  -3 242.274 41.0618   1
  -4   3  -3 266.996 39.2085   7
  -4   3  -4 95.0514 44.9033   1
  -4   3  -4 72.7766 35.4209   7
  -4  -3  -5 54.0291 24.9915   1
  -4   3  -5 85.7243 35.1555   7
  -4   3  -5-5.75729 45.6218   1
  -4   3  -6 84.1119 36.8064   7
  -4  -3  -6 136.065 23.3022   1
  -4   3  -7 142.236 41.3938   7
  -4   3  -8 68.7270 41.6823   7
  -4   3  -9-142.155 52.6032   1
   4   4  -9 49.6780 65.6958   5
  -4   4   9 8.19143 48.0550   7
   4   4  -8 86.8228 62.9271   5
  -4   4   8 47.4784 53.9563   7
   4   4  -7 72.8264 60.6969   5
  -4   4   7-25.5026 37.4894   1
  -4   4   7 81.8686 54.2730   7
   4   4  -6 47.8328 51.8391   5
  -4   4   6 33.0900 36.0857   1
  -4   4   6 22.2389 45.5123   7
   4   4  -5 339.075 56.1743   5
  -4  -4   5 357.305 51.5281   1
  -4   4   5 310.882 48.1474   7
  -4   4   5 253.841 45.2688   1
  -4   4   4 59.2306 43.2758   1
  -4  -4   4 50.7466 42.9033   1
  -4   4   4 26.6696 42.1358   7
   4   4  -3 445.732 58.6555   5
  -4   4   3 534.065 63.0659   1
  -4   4   3 414.538 56.2634   7
  -4  -4   3 501.075 57.9641   1
   4   4  -2 206.603 41.0143   5
  -4   4   2 269.626 51.9482   1
  -4   4   2 204.775 46.6641   7
  -4  -4   2 216.917 50.1723   1
   4   4  -1 25.6918 30.8536   5
  -4  -4   1-53.8931 45.0395   1
  -4   4   1-15.2421 44.3900   7
  -4   4   1 28.4801 48.1933   1
   4   4   0 15.7863 25.9874   5
  -4  -4   0-13.0222 48.8888   1
  -4   4   0 52.1944 41.7717   7
   4  -4   1 3.84574 28.6825   5
  -4  -4  -1 57.9618 46.7446   1
  -4   4  -1 91.9399 39.5822   7
  -4   4  -2 49.7832 41.6114   1
  -4  -4  -2 43.7594 39.9102   1
  -4   4  -2 85.9416 38.5519   7
   4   4   3 71.4404 28.3872   6
  -4  -4  -3 89.5694 38.7202   1
  -4   4  -3 59.3066 44.3507   1
  -4   4  -3 130.466 38.8035   7
  -4  -4  -4 42.0659 32.4837   1
  -4   4  -4-9.67542 45.8924   1
  -4  -4  -5 207.186 30.8647   1
  -4   4  -5 253.447 44.6254   7
  -4  -4  -6 53.1970 19.8964   1
  -4   4  -6 119.923 40.0958   7
  -4   4  -7 92.5516 42.1671   7
  -4   4  -8 64.7535 42.4874   7
   4   5  -9-22.0587 64.3586   5
  -4   5   9-26.1430 50.5953   7
   4   5  -8 50.3958 59.7340   5
  -4   5   8 33.8105 53.6047   7
   4   5  -7-26.5532 51.5917   5
  -4   5   7-9.02348 39.1500   1
  -4   5   7 22.2620 54.9090   7
   4   5  -6 124.477 47.4004   5
  -4   5   6 93.0087 36.6868   1
  -4   5   6 125.174 46.9743   7
   4   5  -5 42.7428 45.9249   5
  -4  -5   5 45.8287 45.6747   1
  -4   5   5 25.8383 41.2933   7
  -4   5   5 5.98618 32.6748   1
  -4  -5   4 603.990 66.2851   1
  -4   5   4 629.733 65.6196   1
  -4   5   4 735.242 68.9223   7
   4   5  -3 326.133 48.2327   5
  -4   5   3 324.751 53.2248   1
  -4   5   3 265.707 51.0908   7
  -4  -5   3 271.821 47.9262   1
   4   5  -2 321.601 50.4570   5
  -4   5   2 441.594 57.2290   1
  -4   5   2 399.127 58.3714   7
  -4  -5   2 449.320 55.9184   1
  -4   5   1 31.6731 46.6254   1
  -4  -5   1 11.0054 45.5304   1
   4   5  -1-27.3457 33.6524   5
  -4   5   1 12.4144 45.9349   7
  -4  -5   0 29.8168 49.6547   1
  -4   5   0 32.9159 45.1984   1
  -4   5   0 28.2051 43.1417   7
  -4  -5  -1-18.2180 43.3985   1
  -4   5  -1 53.0006 37.4723   7
  -4  -5  -2 70.1073 41.9233   1
  -4   5  -2 98.6948 40.7698   7
   4   5   3 30.4574 30.5868   6
  -4  -5  -3 72.5569 34.1534   1
  -4   5  -3 91.1637 38.2389   7
  -4   5  -3-8.75713 44.5507   1
  -4   5  -4 326.073 46.9533   7
  -4  -5  -4 247.639 36.2709   1
  -4  -5  -5 84.4492 25.4991   1
  -4   5  -5 53.3858 45.6882   7
  -4   5  -6 108.196 43.1342   7
  -4   5  -7 62.8174 43.1906   7
  -4   5  -8 61.6868 45.4959   7
   4   6  -9 27.9558 60.1725   5
  -4   6   9 62.7398 53.6288   7
   4   6  -8 149.252 60.0548   5
  -4   6   8 176.625 62.1131   7
   4   6  -7 29.6581 49.0954   5
  -4   6   7-78.9067 37.5438   1
  -4   6   7 22.1986 50.6450   7
   4   6  -6 22.6573 46.8981   5
  -4   6   6 28.0568 32.3225   1
  -4   6   6 40.1287 48.9975   7
   4   6  -5 69.6789 44.1346   5
  -4  -6   5 32.6762 45.5157   1
  -4   6   5 14.8765 47.9866   7
  -4   6   5 65.9300 31.8700   1
  -4   6   4 96.4957 41.2139   1
  -4  -6   4 105.161 43.1752   1
  -4   6   4 156.163 49.7869   7
  -4   6   3-34.6276 44.7384   1
  -4  -6   3 99.8336 44.3033   1
  -4   6   3-31.5278 45.4878   7
   4   6  -2 847.582 85.2080   5
  -4  -6   2 918.936 88.7418   1
  -4   6   2 1039.00 91.4495   1
  -4   6   2 1172.44 92.4273   7
  -4   6   1 44.4166 48.3686   1
   4   6  -1 26.3123 30.9219   5
  -4   6   1 18.8501 45.8507   7
  -4  -6   1 39.4489 44.6804   1
  -4  -6   0 264.496 49.7046   1
  -4   6   0 256.614 44.8545   1
  -4   6   0 197.686 45.8316   7
  -4   6  -1 81.2460 38.9836   1
  -4  -6  -1 62.6099 48.0649   1
  -4   6  -1 94.9889 40.5959   7
   4   6   2 138.650 34.5654   6
  -4  -6  -2 171.643 44.1495   1
  -4   6  -2 185.676 39.6638   7
   4   6   3 25.7270 31.0960   6
  -4  -6  -3-2.26094 33.0331   1
  -4   6  -3 13.9483 42.1069   7
  -4   6  -4-59.4815 45.5660   1
  -4  -6  -4 11.7908 29.2527   1
  -4   6  -5 60.1783 47.4199   7
  -4   6  -6 74.6677 44.4584   7
  -4   6  -7 7.02165 49.9680   7
  -4   6  -8 93.3911 48.3500   7
   4   7  -9-40.6463 55.7207   5
  -4   7   9 3.63660 58.7501   7
   4   7  -8 13.1131 50.8140   5
  -4   7   8 60.2477 59.9111   7
   4   7  -7 13.2835 48.2149   5
  -4   7   7 15.9239 54.2342   7
   4   7  -6 53.9282 42.8901   5
  -4   7   6 31.8154 33.1820   1
  -4   7   6 15.2587 46.9927   7
   4   7  -5 74.0656 42.4811   5
  -4  -7   5 13.5724 47.9110   1
  -4   7   5 19.1833 49.4310   7
  -4   7   5 29.7770 32.0698   1
  -4   7   4 309.024 46.4620   1
   4   7  -4 360.947 50.5546   5
  -4  -7   4 397.809 53.7590   1
  -4   7   4 274.021 56.8778   7
  -4   7   3 274.131 46.8137   1
  -4  -7   3 288.730 50.5423   1
  -4   7   3 301.969 54.9615   7
   4   7  -2 363.808 51.8943   5
  -4   7   2 501.501 56.1962   1
  -4   7   2 432.687 58.8653   7
  -4  -7   2 521.198 57.9449   1
  -4  -7   1 1135.08 104.791   1
  -4   7   1 1241.49 105.318   1
  -4   7   1 1178.93 104.611   7
  -4  -7   0 53.3570 44.0272   1
  -4   7   0 49.9504 39.6370   1
  -4   7   0 15.9281 41.6766   7
  -4  -7  -1 127.402 46.7311   1
  -4   7  -1 71.7090 38.8315   1
  -4   7  -1 51.1464 45.1724   7
   4   7   2 46.9856 31.8315   6
  -4   7  -2 42.0157 37.2244   1
  -4  -7  -2 44.6446 39.8761   1
  -4   7  -2 45.9121 43.7680   7
   4   7   3 53.6784 33.2350   6
  -4  -7  -3-17.1049 34.0279   1
  -4   7  -3 44.1103 45.3788   7
  -4  -7  -4 7.42001 24.7349   1
   4   7   4-15.2351 30.3243   6
  -4   7  -5 25.3816 45.7756   7
  -4   7  -6 57.3689 53.3629   7
  -4   7  -7 25.6944 48.6537   7
  -4   7  -8 32.2536 47.4428   7
   4   8  -8-9.53043 52.4721   5
  -4   8   8 4.80186 60.6882   7
   4   8  -7 64.7648 44.7725   5
  -4   8   7 82.3156 54.0820   7
   4   8  -6-24.7338 43.1666   5
  -4   8   6 4.88422 32.4369   1
  -4   8   6-8.20797 48.9154   7
   4   8  -5 370.208 50.2105   5
  -4   8   5 403.475 59.4414   7
  -4   8   5 342.382 42.5976   1
  -4   8   4 51.8936 36.3439   1
   4   8  -4 44.2988 41.1848   5
  -4  -8   4-6.35420 50.0933   1
  -4   8   4 33.9097 50.6444   7
  -4  -8   3 924.577 86.8924   1
  -4   8   3 909.046 83.1960   1
  -4   8   3 970.749 90.1396   7
  -4  -8   2 36.0481 45.4067   1
  -4   8   2 55.5785 44.0428   1
  -4   8   2 14.7494 50.4346   7
  -4   8   1 63.3337 46.7131   1
  -4   8   1 87.8296 47.2559   7
  -4  -8   1 68.1809 42.0861   1
  -4   8   0 139.901 38.2510   1
  -4   8   0 74.3555 46.2901   7
  -4  -8   0 97.1555 44.7200   1
  -4  -8  -1-7.73581 40.6867   1
  -4   8  -1 45.2387 35.7479   1
  -4   8  -1 85.2284 42.3625   7
   4   8   2 50.6887 33.9111   6
  -4  -8  -2-25.4776 35.3552   1
  -4   8  -2-4.78267 38.5299   1
  -4   8  -2-19.4625 45.7569   7
   4   8   3 44.8394 33.7259   6
  -4  -8  -3 79.4236 31.4028   1
  -4   8  -3 45.0698 39.8880   1
  -4   8  -3 73.7463 47.5811   7
  -4   8  -4 48.9111 50.4214   7
   4   8   4-18.4935 33.9112   6
  -4   8  -5 60.0153 52.8028   7
  -4   8  -6 104.603 52.7826   7
  -4   8  -7 39.8184 54.0505   7
  -4   8  -8 83.9176 51.5885   7
  -4   9   8 11.0744 63.3548   7
  -4   9   7 88.6998 53.8745   7
  -4   9   6 61.0934 50.2686   7
  -4   9   5 107.135 47.3266   7
  -4   9   5 33.9906 30.8818   1
  -4  -9   4 383.010 57.4399   1
  -4   9   4 341.083 56.3045   7
  -4   9   4 283.688 40.6358   1
  -4   9   3 199.487 41.1598   1
  -4  -9   3 213.397 52.4960   1
  -4   9   3 273.226 55.6064   7
  -4  -9   2 110.813 43.4688   1
  -4   9   2 58.4339 41.5646   1
  -4   9   2 57.9086 51.1385   7
  -4  -9   1 760.953 74.8167   1
  -4   9   1 813.479 76.5477   1
  -4   9   1 777.039 77.5016   7
  -4   9   0-36.4569 38.5200   1
  -4   9   0 25.0000 46.9144   7
  -4  -9   0 67.3177 38.9490   1
   4   9   1 104.899 35.5703   6
  -4   9  -1 78.5526 34.3338   1
  -4   9  -1 63.8527 45.2635   7
  -4  -9  -1 34.3815 35.7119   1
   4   9   2 9.64537 32.8765   6
  -4   9  -2 9.71764 38.1827   1
  -4   9  -2 77.3553 47.5909   7
  -4  -9  -2 28.5086 29.1083   1
   4   9   3 23.0737 32.2052   6
  -4   9  -3-44.3200 41.5031   1
  -4   9  -3 69.3205 46.2979   7
  -4   9  -4 25.0100 47.9675   7
   4   9   4 9.87661 34.3413   6
  -4   9  -5 63.3875 51.2920   7
  -4   9  -6 29.0318 58.1273   7
   4  -9   7 56.4169 43.1193   2
  -4   9  -7 8.89083 53.2785   7
  -4  10   8 5.35123 54.9244   7
  -4  10   7 109.648 54.5243   7
  -4  10   6 35.3563 46.2100   7
  -4  10   5-58.9708 50.1624   7
  -4  10   4 7.93120 47.3016   7
  -4  10   4 9.54831 29.4118   1
  -4  10   3 240.625 41.3339   1
  -4 -10   3 209.657 51.5867   1
  -4  10   3 199.998 54.0933   7
  -4 -10   2 123.078 47.6269   1
  -4  10   2 102.895 39.0127   1
  -4  10   2 81.7482 48.4630   7
  -4  10   1 21.9704 43.5950   1
  -4 -10   1 21.9843 41.3848   1
  -4  10   1 50.0687 51.9257   7
   4  10   0 200.919 39.5063   6
  -4  10   0 263.514 41.7021   1
  -4 -10   0 239.962 40.1091   1
  -4  10   0 299.756 54.2445   7
   4  10   1 8.78660 34.4838   6
  -4  10  -1 1.38016 33.6422   1
  -4 -10  -1 28.5326 30.7553   1
  -4  10  -1 38.0485 47.6689   7
   4  10   2-48.8667 36.0347   6
  -4  10  -2-46.0551 39.4312   1
  -4  10  -2 3.83535 48.3228   7
  -4  10  -3 50.6659 48.0862   7
  -4  10  -3-51.1462 40.4269   1
   4  10   3 9.08613 33.9495   6
  -4  10  -4 20.5257 53.1853   7
   4  10   4-56.0803 39.1118   6
  -4  10  -5 159.095 58.1619   7
  -4  10  -6 108.809 55.4399   7
  -4  10  -7 79.8808 56.8210   7
  -4  11   7 78.1706 51.9430   7
  -4  11   6 75.7626 46.0484   7
  -4  11   5 91.1025 49.1722   7
  -4  11   4 634.804 69.3073   7
  -4  11   3-15.3301 35.2613   1
  -4  11   3 46.3604 50.2296   7
  -4 -11   2 138.361 50.3460   1
  -4  11   2 227.709 40.1403   1
  -4  11   2 211.854 53.2093   7
  -4  11   1 30.3337 37.4509   1
  -4 -11   1 18.8081 38.4084   1
  -4  11   1-14.3917 48.4917   7
   4  11   0 6.22042 35.4349   6
  -4 -11   0 20.7359 56.7093   4
  -4 -11   0 18.5979 35.5133   1
  -4  11   0-27.2640 37.9017   1
  -4  11   0-23.0567 49.8354   7
   4  11   1-12.3447 36.0920   6
  -4  11  -1-14.3606 37.1116   1
  -4  11  -1 1.22436 46.5557   7
   4  11   2 48.3928 35.8861   6
  -4  11  -2 19.2582 36.5134   1
  -4  11  -2 9.00479 47.3490   7
  -4  11  -3-49.0409 40.4398   1
  -4  11  -3 30.9424 51.5886   7
   4  11   3-27.6520 37.8908   6
  -4  11  -4 97.9955 50.2085   7
   4  11   4 36.8001 41.0151   6
  -4  11  -5 33.8987 52.6433   7
  -4  11  -6 63.1714 56.0477   7
  -4  11  -7 96.7365 58.8128   7
  -4  12   7 43.4083 48.9934   7
  -4  12   6-19.1394 45.2267   7
  -4  12   5 437.053 59.9450   7
  -4  12   4-20.6600 47.8929   7
  -4  12   3-27.0963 47.7386   7
  -4  12   2 164.103 37.6016   1
  -4  12   2 169.049 50.3254   7
   4  12  -1-1.13673 39.5948   6
  -4 -12   1-0.43631 64.5970   4
  -4 -12   1-24.6812 40.5695   1
  -4  12   1 12.3830 49.3890   7
  -4  12   1 41.0956 37.0793   1
   4  12   0 57.5947 37.2142   6
  -4  12   0 54.3087 34.8918   1
  -4  12   0 102.822 52.1958   7
   4  12   1 19.2556 35.6236   6
  -4  12  -1 17.1144 33.8673   1
  -4  12  -1-55.1546 48.3927   7
   4  12   2 57.8079 34.8116   6
  -4  12  -2 50.2275 51.6331   7
  -4  12  -2 31.0567 38.9943   1
  -4  12  -3-38.9746 42.9016   1
  -4  12  -3 61.1672 50.8004   7
   4  12   3 31.6615 41.1808   6
  -4  12  -4 68.8549 50.1551   7
   4  12   4 22.3735 39.8680   6
  -4  12  -5 146.595 54.0007   7
  -4  12  -6 77.9181 55.8334   7
  -4 -13   6 86.6780 37.7610   4
  -4  13   6 94.5694 44.1256   7
  -4 -13   5 132.398 39.3693   4
  -4  13   5 115.724 47.0217   7
  -4 -13   4 331.209 49.6612   4
  -4  13   4 284.479 52.5071   7
   4  13  -3 100.892 44.4830   6
  -4  13   3 3.48068 50.2332   7
  -4 -13   2-8.16379 59.5235   4
  -4  13   2 1.62482 34.9154   1
  -4  13   2-51.6375 51.6638   7
   4  13  -1 23.5382 42.4987   6
  -4 -13   1 142.703 61.9297   4
  -4  13   1 109.375 51.2692   7
  -4  13   1 128.582 36.4149   1
   4  13   0-7.98970 38.3765   6
  -4  13   0 34.4306 35.3200   1
  -4  13   0 45.5923 53.4670   7
   4  13   1 63.4655 36.7607   6
  -4  13  -1 83.7802 35.0325   1
  -4  13  -1 99.0115 52.8408   7
  -4  13  -2 20.6216 47.9603   7
  -4  13  -2-19.4043 36.9893   1
   4  13   2-6.62614 38.5288   6
  -4  13  -3 17.3909 42.9769   1
  -4  13  -3 19.8866 49.1043   7
   4  13   3 34.0850 41.4886   6
  -4  13  -4 117.764 53.4907   7
  -4  13  -4-7.00027 46.2916   1
  -4  13  -5 174.240 54.5302   7
  -4  13  -6 74.5637 54.9661   7
   4  14  -6 211.128 43.2057   6
  -4 -14   6 130.548 39.5000   4
  -4  14   6 160.338 47.1805   7
  -4  14   5 786.716 80.1553   7
   4  14  -5 815.938 76.2074   6
   4  14  -4 46.2976 41.8466   6
  -4 -14   4 106.950 41.4372   4
  -4  14   4 3.52404 49.1304   7
   4  14  -3 75.5138 42.9506   6
  -4 -14   3 78.6366 49.2689   4
  -4  14   3 22.6020 51.0167   7
  -4 -14   2 129.039 60.1752   4
  -4  14   2-50.3942 51.1017   7
   4  14  -1 10.7675 42.9659   6
  -4 -14   1-32.2150 60.9585   4
  -4  14   1-4.39738 50.6926   7
  -4  14   1 12.0502 36.4068   1
   4  14   0-0.29510 39.7431   6
  -4  14   0 3.36741 37.3667   1
  -4  14   0 42.3571 51.4251   7
   4  14   1 42.6965 37.2458   6
  -4  14  -1 20.5765 50.9292   7
  -4  14  -1-25.6796 34.9686   1
  -4  14  -2 6.73233 37.1365   1
  -4  14  -2-23.3619 52.4354   7
   4  14   2 63.3816 38.2909   6
  -4  14  -3 19.0367 43.3520   1
  -4  14  -3 129.879 49.8275   7
   4  14   3 72.1456 40.3845   6
  -4  14  -4-35.0309 45.6262   1
  -4  14  -4-22.8175 52.5346   7
  -4  14  -5 246.518 55.9693   7
   4  15  -5 41.1149 39.1073   6
  -4 -15   5 31.7420 36.7328   4
  -4  15   5 35.9727 44.3494   7
   4  15  -4 106.684 41.3659   6
  -4 -15   4 100.379 42.3593   4
  -4  15   4 70.8028 49.0414   7
   4  15  -3-3.22994 42.0127   6
  -4 -15   3 15.5954 48.1579   4
  -4  15   3 5.87712 50.2877   7
  -4 -15   2 25.7980 59.9616   4
  -4  15   2-10.9127 49.5811   7
   4  15  -1-9.75475 41.9828   6
  -4  15   1-39.2062 54.6322   7
   4  15   0 27.2666 38.6311   6
  -4  15   0 14.7604 54.3394   7
  -4  15  -1 21.8573 35.7859   1
  -4  15  -1 2.58208 52.8636   7
   4  15   1 46.2214 40.6841   6
  -4  15  -2 9.95285 36.3784   1
  -4  15  -2-3.55310 52.3982   7
   4  15   2 4.01056 41.5722   6
  -4  15  -3-20.5768 39.9387   1
  -4  15  -3 38.8436 47.7830   7
   4  15   3 81.7322 42.3969   6
  -4  15  -4 86.1531 43.6395   1
  -4  15  -4 141.303 52.0621   7
   4  16  -4 37.4195 40.9178   6
  -4 -16   4 66.9496 41.4721   4
   4  16  -3-44.9202 41.4190   6
  -4 -16   3-51.5584 49.0493   4
  -4  16   3 7.91214 49.6677   7
  -4 -16   2 136.887 57.8698   4
  -4  16   2 108.738 51.5832   7
   4  16  -1 35.2067 41.6668   6
  -4  16   1-11.3498 51.3773   7
   4  16   0 134.340 42.3098   6
  -4  16   0 170.565 53.9245   7
  -4  16  -1 22.5250 53.1856   7
   4  16   1 43.0081 40.4321   6
  -4  16  -2 70.9908 36.4876   1
  -4  16  -2 76.1524 51.8546   7
   4  16   2 8.69396 40.2166   6
  -4  16  -3 18.8238 47.7957   7
  -4  16  -3 0.30043 38.7871   1
  -4 -17   2 9.62593 58.6573   4
   4  17  -1-2.06212 43.1094   6
   4  17   0-49.0283 41.5420   6
   4  17   1 1.98771 40.7688   6
   4  17   2-13.0785 40.7513   6
   5   0  -7-56.4249 61.5995   5
  -5   0   6 5.06892 51.6798   1
   5   0  -5-40.8790 51.2615   5
  -5   0   5-11.6925 49.7181   1
   5   0  -4 4.75646 43.3204   5
  -5   0   4-2.82871 51.6519   1
   5   0  -3-11.7841 40.4026   5
   5   0  -2 373.951 50.2896   5
   5   0  -1 19.0142 33.7423   5
  -5   0   1-8.75011 51.4754   1
   5   0   0 204.836 36.9024   5
  -5   0   0 332.545 53.8666   1
  -5   0  -1-1.28960 48.5701   1
  -5   0  -2 360.848 58.4434   1
  -5   0  -3-8.09903 48.7858   1
  -5   0  -4 273.025 48.3942   1
  -5   0  -5 19.5624 37.2784   1
  -5   0  -6 23.5373 33.7294   1
   5   1  -7 106.184 58.9157   5
  -5   1   7-89.3147 51.4505   1
   5  -1  -6 64.8098 54.7369   5
  -5  -1   6-3.64106 54.2386   1
  -5   1   6-39.2331 48.3542   1
   5   1  -5 12.0180 46.1613   5
   5  -1  -5 11.0498 49.4254   5
  -5  -1   5 45.8320 50.1791   1
  -5   1   5 51.7057 50.3393   1
   5   1  -4 25.4785 43.4146   5
   5  -1  -4 3.01241 46.7907   5
  -5   1   4-53.3283 52.5035   1
  -5   1   3 37.1780 55.3302   1
   5   1  -3-19.1343 42.6405   5
   5  -1  -3 29.0092 41.4579   5
  -5  -1   2 209.548 52.0719   1
   5   1  -2 116.448 40.1629   5
   5  -1  -2 137.330 41.8721   5
   5   1  -1 16.5924 32.3941   5
   5  -1  -1-3.23593 35.6752   5
  -5  -1   1-38.8235 49.4316   1
  -5   1   1 22.3545 52.2515   1
   5   1   0 13.5999 31.0101   5
   5  -1   0-8.65658 29.4069   5
  -5  -1   0-22.6067 47.8278   1
  -5   1   0 20.1145 50.8847   1
  -5  -1  -1 161.470 49.8635   1
  -5   1  -1 207.986 51.9726   1
  -5   1  -2 121.677 51.9407   1
  -5  -1  -2 85.8840 49.7791   1
  -5   1  -3 243.383 54.9920   1
  -5  -1  -3 193.581 49.1441   1
  -5  -1  -4 164.627 41.4972   1
  -5   1  -4 197.604 46.7462   1
  -5  -1  -5 67.5633 36.3181   1
  -5   1  -5 78.7474 41.5301   1
  -5  -1  -6 106.925 31.2535   1
  -5   1  -6 123.194 38.7185   1
   5   2  -7 37.4966 59.0237   5
  -5   2   7-55.5271 50.5427   1
  -5  -2   6-20.9986 53.9876   1
  -5   2   6 16.6380 49.6407   1
   5   2  -5 59.9922 45.7967   5
  -5  -2   5 20.3581 51.2197   1
  -5   2   5 39.4275 47.6188   1
   5   2  -4-30.5071 44.3194   5
   5  -2  -4 28.1445 46.6774   5
  -5   2   4 16.8227 53.1999   1
  -5   2   3 114.705 53.7744   1
   5   2  -3 128.754 45.7972   5
   5  -2  -3 143.238 47.9082   5
  -5  -2   3 33.6608 49.9187   1
  -5  -2   2 59.6479 49.3158   1
   5   2  -2-38.2725 37.7425   5
   5  -2  -2 0.32745 38.9156   5
  -5   2   2 1.80198 55.8708   1
   5   2  -1 74.7267 32.8769   5
   5  -2  -1 79.9359 36.8073   5
  -5  -2   1 102.539 48.6781   1
   5   2   0 29.4023 30.2577   5
   5  -2   0 33.3786 31.1329   5
  -5  -2   0 71.6686 48.9856   1
  -5   2   0 3.58263 49.1539   1
  -5  -2  -1 48.5090 47.2470   1
  -5   2  -1 58.7685 50.1076   1
  -5   2  -2 17.3545 50.4277   1
  -5  -2  -2-36.5972 45.4744   1
  -5   2  -3 194.645 52.0625   1
  -5  -2  -3 204.677 42.9442   1
  -5   2  -4 163.082 48.3534   1
  -5  -2  -4 116.668 38.7174   1
  -5  -2  -5 212.029 36.1467   1
  -5   2  -5 279.455 47.9585   1
  -5  -2  -6 38.5534 26.3991   1
  -5   2  -6 41.9481 39.5468   1
   5   3  -7 64.3759 56.4530   5
  -5   3   7-4.28307 46.9586   1
  -5  -3   6-30.4776 56.0036   1
  -5   3   6-26.8461 44.5626   1
   5   3  -5-14.5812 48.3151   5
  -5   3   5-11.0058 45.8339   1
   5   3  -4-51.2191 46.2778   5
  -5  -3   4-28.8182 47.2391   1
  -5   3   4 32.6125 53.8070   1
  -5   3   3-29.3173 53.6352   1
   5   3  -3-1.05110 43.8905   5
  -5  -3   3 42.2115 46.9321   1
   5   3  -2 35.8430 37.8922   5
   5  -3  -2 18.7440 46.8022   5
  -5   3   2 39.5018 54.7207   1
  -5  -3   2-3.93052 47.7024   1
   5  -3  -1 433.176 52.7913   5
   5   3  -1 370.656 48.2285   5
   5  -3   0-4.20218 32.4545   5
  -5  -3   0 67.0573 51.5628   1
  -5  -3  -1 206.554 52.3469   1
  -5   3  -1 270.172 54.8824   1
  -5   3  -2 0.69551 52.1115   1
  -5  -3  -2 85.1680 43.5812   1
  -5   3  -3-14.6774 52.5028   1
  -5  -3  -3-1.31347 39.2083   1
  -5   3  -4 79.5162 47.9466   1
  -5  -3  -4 10.3396 31.4606   1
  -5  -3  -5 92.8411 29.9452   1
  -5   3  -5 103.064 48.2100   1
  -5   3  -6 91.9177 47.8321   1
   5   4  -7 29.8460 56.2698   5
  -5   4   7-76.2905 45.0017   1
  -5   4   6 4.49138 40.8158   1
  -5  -4   5 104.330 53.9112   1
  -5   4   5 35.2595 45.6670   1
   5   4  -4-5.06965 49.0451   5
  -5  -4   4 27.5814 48.0276   1
  -5   4   4 8.13963 38.2814   7
  -5   4   4 88.1464 49.4699   1
  -5   4   3 13.6702 56.2706   1
   5   4  -3 51.7543 45.9755   5
  -5   4   3 58.4784 37.6411   7
  -5  -4   3 58.4127 47.0884   1
   5   4  -2 194.118 43.1302   5
  -5   4   2 245.004 58.5919   1
  -5   4   2 171.384 40.5305   7
  -5  -4   2 214.633 51.1586   1
  -5  -4   1 8.55331 50.0249   1
   5   4  -1 20.9380 34.9981   5
   5  -4  -1 5.95138 42.1003   5
  -5   4   1 41.8423 50.8368   1
  -5   4   1 25.1353 39.7372   7
   5  -4   0 77.7469 33.8322   5
  -5  -4   0 76.3703 49.3476   1
  -5   4   0 116.139 39.3820   7
  -5  -4  -1-36.0037 48.0186   1
  -5   4  -1 125.960 39.3900   7
  -5   4  -2 85.9664 51.0822   1
  -5  -4  -2 50.2445 41.6431   1
  -5  -4  -3 5.27586 35.0381   1
  -5   4  -3-23.2240 48.2478   1
  -5  -4  -4-6.03318 29.7164   1
  -5   4  -4-37.0863 47.6087   1
  -5   4  -5 8.61621 49.0931   1
  -5  -4  -5-6.22463 26.1763   1
  -5   4  -6 86.0097 52.8901   1
   5   5  -7 11.9267 54.7765   5
  -5   5   7-53.5269 42.0159   1
   5   5  -6 21.7239 51.7805   5
  -5   5   6 11.5344 38.6355   1
  -5   5   6 20.4586 48.4203   7
  -5  -5   5-56.5786 53.3688   1
  -5   5   5-0.95096 41.2115   7
  -5   5   5 2.81992 44.1497   1
   5   5  -4 54.5320 51.7214   5
  -5  -5   4-1.06294 48.2399   1
  -5   5   4 92.1115 42.4691   7
  -5   5   4 35.1601 50.7164   1
   5   5  -3 10.6372 47.0067   5
  -5   5   3 4.34147 51.0764   1
  -5   5   3 49.3165 39.8042   7
  -5  -5   3 27.6034 47.5208   1
   5   5  -2 379.762 51.5473   5
  -5   5   2 428.886 64.1245   1
  -5   5   2 415.525 53.8525   7
  -5  -5   2 371.564 58.6150   1
   5  -5  -1-7.12423 48.6242   5
  -5   5   1 133.676 49.3193   1
  -5   5   1 46.3542 37.9617   7
  -5  -5   1 120.197 48.9606   1
  -5  -5   0 12.1506 48.2341   1
   5  -5   0-44.6875 35.2883   5
  -5   5   0 29.8882 40.9817   7
  -5   5   0 28.0368 46.9295   1
  -5  -5  -1 15.2915 45.3769   1
  -5   5  -1-9.60572 39.3976   7
  -5  -5  -2 56.9765 39.2671   1
  -5   5  -2 52.3150 38.5447   7
  -5  -5  -3 5.52880 34.7692   1
  -5   5  -3-47.8736 47.7865   1
  -5   5  -3 13.3062 39.2475   7
  -5  -5  -4 10.9046 32.8874   1
  -5   5  -4 50.3425 49.5738   1
  -5   5  -5 31.8832 51.7846   1
  -5   5  -6 89.3214 57.8536   1
   5   6  -7 54.3148 55.6318   5
  -5   6   7 48.6957 55.3217   7
   5   6  -6 47.4695 51.5977   5
  -5   6   6 76.3488 37.0640   1
  -5   6   6 102.435 48.1930   7
  -5  -6   5-8.90947 54.6931   1
  -5   6   5 44.1492 46.9428   7
  -5   6   5 31.7578 41.7506   1
   5   6  -4 16.9527 51.8363   5
  -5  -6   4-24.5724 50.8752   1
  -5   6   4-4.11823 43.2991   7
  -5   6   4-27.0550 45.1491   1
   5   6  -3 146.357 50.6035   5
  -5   6   3 154.962 54.5804   1
  -5  -6   3 132.714 51.8207   1
  -5   6   3 138.894 46.0934   7
  -5   6   2 636.404 72.5316   1
  -5   6   2 636.799 68.2350   7
  -5  -6   2 647.715 70.1287   1
  -5   6   1-21.9737 49.6389   1
  -5   6   1 14.4443 39.9661   7
  -5  -6   1-2.36411 50.7955   1
  -5   6   0 38.3175 39.4103   7
  -5   6   0 110.854 46.0618   1
  -5  -6   0 31.0689 49.2822   1
  -5  -6  -1-7.30257 42.9291   1
  -5   6  -1-10.0984 48.5343   1
  -5   6  -1 25.4301 40.4457   7
   5   6   2 10.2808 33.4436   6
  -5  -6  -2 1.35010 37.4192   1
  -5   6  -2 8.08744 37.3921   7
  -5  -6  -3 28.5291 34.2535   1
  -5   6  -3 46.7144 41.4599   7
  -5   6  -4 12.2984 46.7134   1
  -5   6  -4-29.2304 42.5361   7
  -5   6  -5 32.4313 53.6479   1
  -5   6  -5 87.3948 45.2482   7
  -5   6  -6 51.8289 59.6000   1
   5   7  -6 40.9426 51.2212   5
  -5   7   6 15.8886 36.8178   1
  -5   7   6 28.3566 52.3989   7
  -5  -7   5-29.9867 57.5923   1
  -5   7   5 33.6587 47.9273   7
  -5   7   5 3.37419 38.0403   1
  -5  -7   4 28.8959 52.8110   1
  -5   7   4 4.38521 44.0782   7
  -5   7   4 49.5283 43.4564   1
  -5   7   3 233.675 53.0041   1
  -5  -7   3 302.188 54.5443   1
  -5   7   3 212.900 50.5146   7
  -5   7   2 295.835 53.0774   1
  -5  -7   2 282.438 55.9912   1
  -5   7   2 244.711 52.8770   7
  -5   7   1 48.2152 47.2893   1
  -5   7   1 36.6071 45.9226   7
  -5  -7   1 80.4553 50.1185   1
  -5   7   0 49.3480 44.7515   7
  -5   7   0 36.0257 46.8252   1
  -5  -7   0 20.9398 45.1878   1
   5   7   1 5.78549 34.1670   6
  -5   7  -1 20.9279 44.8161   1
  -5   7  -1-1.66880 39.2734   7
  -5  -7  -1-4.38266 43.0689   1
   5   7   2 45.7923 36.7318   6
  -5  -7  -2-20.6848 37.4085   1
  -5   7  -2 10.5173 43.5594   1
  -5   7  -2-12.1356 39.7811   7
  -5  -7  -3 25.6932 32.2222   1
  -5   7  -3-29.8862 42.2841   7
  -5   7  -4 29.8368 47.1135   1
  -5   7  -4 8.05378 41.0038   7
  -5   7  -5-12.1801 50.9697   1
  -5   7  -5 8.24261 42.5060   7
  -5   8   6 24.5105 52.9540   7
  -5   8   5 54.4956 49.7980   7
  -5   8   5 80.6806 36.5874   1
  -5  -8   4-7.54938 56.0001   1
  -5   8   4 46.0609 47.5051   7
  -5   8   4 32.2897 42.0585   1
  -5  -8   3 946.240 86.2457   1
  -5   8   3 805.132 81.9537   1
  -5   8   3 795.212 81.0466   7
  -5   8   2 138.191 48.0958   1
  -5  -8   2 158.996 53.1118   1
  -5   8   2 119.662 46.1043   7
  -5   8   1 3.54932 45.0250   1
  -5  -8   1 3.73051 48.8036   1
  -5   8   1-26.7348 43.0181   7
  -5   8   0-28.8004 46.2020   7
  -5  -8   0-42.0321 42.1833   1
  -5   8   0 6.69866 47.2676   1
   5   8   1 36.9470 33.6464   6
  -5   8  -1-11.8385 44.4336   1
  -5   8  -1-22.2532 42.3818   7
  -5  -8  -1 4.96734 38.0932   1
   5   8   2-1.04179 35.6596   6
  -5   8  -2 32.6434 41.2575   1
  -5   8  -2 72.8483 44.8459   7
  -5  -8  -2 27.6231 34.9428   1
  -5   8  -3 10.5044 43.6267   7
  -5   8  -3 45.4907 40.4182   1
  -5   8  -4-12.9826 45.8949   7
  -5   8  -5 127.083 51.1529   1
  -5   8  -5 110.612 46.0900   7
  -5   9   5 40.5115 47.6599   7
  -5  -9   4 393.883 63.6649   1
  -5   9   4 344.012 54.9954   7
  -5   9   4 214.616 43.6024   1
  -5   9   3 210.971 46.0021   1
  -5  -9   3 211.879 60.5931   1
  -5   9   3 124.886 51.5828   7
  -5   9   2 96.3198 44.7352   1
  -5  -9   2 77.6459 53.5094   1
  -5   9   2 75.5086 48.7263   7
  -5  -9   1 40.2517 45.4398   1
  -5   9   1 32.6988 43.6575   1
  -5   9   1 29.6414 44.8490   7
   5   9   0-11.5761 35.9604   6
  -5  -9   0-3.25195 42.0580   1
  -5   9   0-2.21678 47.2941   7
  -5   9   0 26.9865 46.0885   1
   5   9   1 10.6518 35.1365   6
  -5   9  -1 19.5237 43.1673   1
  -5   9  -1 63.2927 46.7650   7
  -5  -9  -1 24.2261 34.5301   1
   5   9   2 8.13322 33.8901   6
  -5   9  -2 12.9943 40.7016   1
  -5   9  -2 12.7321 42.5432   7
  -5   9  -3 50.4037 43.6652   7
  -5   9  -3 42.4785 41.7993   1
  -5   9  -4 43.6896 43.5878   1
  -5   9  -4-10.3839 48.5748   7
  -5   9  -5-33.4657 46.0979   7
  -5  10   5-44.7448 48.7132   7
  -5  10   4 3.27699 48.7109   7
  -5  10   3 305.810 50.5388   1
  -5 -10   3 389.468 67.0611   1
  -5  10   3 379.627 57.5256   7
  -5  10   2 8.04787 44.9939   1
  -5 -10   2 26.3390 51.2906   1
  -5  10   2-34.6809 48.3871   7
  -5 -10   1 27.7931 46.2363   1
  -5  10   1 35.6243 42.1140   1
  -5  10   1 58.2473 44.9366   7
   5  10   0 29.6213 35.8178   6
  -5 -10   0 2.78644 39.8789   1
  -5  10   0 28.4451 44.9443   7
  -5  10   0 6.33996 44.0124   1
   5  10   1 38.6019 33.2647   6
  -5  10  -1 123.351 43.9153   1
  -5  10  -1-11.8427 44.6605   7
   5  10   2 40.1178 36.3318   6
  -5  10  -2 36.2303 40.8610   1
  -5  10  -2 64.7552 47.7399   7
  -5  10  -3 3.38439 46.4009   7
  -5  10  -3-6.47807 39.4738   1
  -5  10  -4-30.2644 41.5471   1
  -5  10  -4 47.7428 50.3782   7
  -5  11   4 322.907 54.5663   7
  -5  11   3 28.6204 48.6872   7
  -5  11   2 51.7934 40.7720   1
  -5 -11   2 70.9109 53.0020   1
  -5  11   2-6.02013 46.2764   7
   5  11  -1-27.1076 44.1348   6
  -5 -11   1-23.9417 42.4664   1
  -5  11   1 41.4957 41.4015   1
  -5  11   1 76.1012 49.3556   7
   5  11   0 61.6925 37.7634   6
  -5  11   0 72.7626 49.9685   7
  -5  11   0 32.2727 41.1416   1
   5  11   1 11.3260 36.2740   6
  -5  11  -1 14.9574 45.1340   1
  -5  11  -1 39.7165 47.8278   7
   5  11   2 41.8280 36.1187   6
  -5  11  -2 41.2905 42.7849   1
  -5  11  -2 35.2601 50.0780   7
  -5  11  -3-29.4294 47.4992   7
  -5  11  -3-2.91094 41.6460   1
   5  12  -3 48.7989 53.3228   6
  -5 -12   3 17.9071 39.9847   4
  -5  12   3-32.4593 45.1318   7
   5  12  -2 76.6944 48.3961   6
  -5  12   2 52.3188 48.9094   7
   5  12  -1-19.8769 43.0945   6
  -5  12   1 42.3714 41.9028   1
  -5  12   1 30.0505 46.9078   7
   5  12   0 103.792 39.5567   6
  -5  12   0 125.681 47.8339   7
  -5  12   0 102.344 41.7814   1
   5  12   1 6.09994 35.4686   6
  -5  12  -1 83.2742 42.9523   1
  -5  12  -1 103.682 50.6086   7
  -5  12  -2 19.9467 42.6064   1
  -5  12  -2 44.7231 50.7666   7
   5  12   2 5.20610 34.4544   6
  -5  12  -3 12.6096 48.1328   7
  -5  12  -3 3.26973 42.0716   1
   5  13  -2-37.9264 47.3069   6
  -5  13   2 8.79893 46.0226   7
   5  13  -1 96.9353 44.3094   6
  -5  13   1 50.2238 47.3450   7
   5  13   0 11.7350 37.9036   6
  -5  13   0 67.1523 47.6205   7
  -5  13   0-31.4600 39.3239   1
   5  13   1 15.7213 33.8257   6
  -5  13  -1 49.8557 41.9953   1
  -5  13  -1-5.19903 48.4412   7
   6   0  -3-3.18971 38.7969   5
   6   0  -2 51.4109 39.2973   5
  -6   0   1 87.1907 53.1092   1
  -6   0   0 1952.58 162.934   1
  -6   0  -1-11.9117 53.0661   1
  -6   0  -2 224.288 53.0537   1
   6   1  -3 37.3375 37.5699   5
   6  -1  -3-22.9341 41.0320   5
  -6   1   3 55.4462 48.8706   1
   6   1  -2 75.1006 36.3230   5
   6  -1  -2 62.5101 40.3784   5
  -6  -1   2 46.4804 49.7104   1
  -6  -1   1 492.460 65.4384   1
  -6   1   1 493.764 65.7564   1
  -6  -1   0 25.7925 51.5338   1
  -6   1   0 43.4498 53.4387   1
  -6  -1  -1 403.062 59.4279   1
  -6   1  -1 323.733 60.6646   1
  -6  -1  -2 89.3726 47.6772   1
  -6   1  -2 31.0158 51.8653   1
   6   2  -3 3.88590 38.2320   5
   6  -2  -3 148.186 43.6582   5
  -6  -2   3 24.4355 46.9620   1
  -6   2   3 44.3499 50.3631   1
  -6   2   2 51.8787 52.1993   1
   6  -2  -2 91.3585 42.3966   5
  -6  -2   2 117.380 49.4328   1
  -6  -2   1 78.7787 49.9588   1
  -6  -2   0 135.134 52.3299   1
  -6   2   0 159.699 54.0912   1
  -6  -2  -1 30.1178 47.1124   1
  -6   2  -1-4.73016 50.7212   1
  -6  -2  -2 88.8870 45.8739   1
  -6   2  -2 36.3895 51.4978   1
   6   3  -3 49.6713 38.9381   5
   6  -3  -3-1.22743 45.5877   5
  -6  -3   3 4.11112 48.3072   1
  -6   3   3 6.54767 50.0252   1
  -6   3   2 78.5298 51.5336   1
  -6  -3   2 82.6183 48.4152   1
  -6   3   1 421.675 61.8647   1
  -6  -3   1 413.268 60.5167   1
  -6  -3   0 6.93296 48.0305   1
  -6  -3  -1 135.797 46.6609   1
  -6   3  -1 77.1166 52.1140   1
  -6  -3  -2-44.2969 40.8561   1
  -6   3  -2-57.6533 52.6536   1
  -6   4   2 149.972 49.8040   1
  -6  -4   2 114.351 49.3517   1
  -6   4   1 101.239 49.8584   1
  -6  -4   1 13.0932 47.3273   1
  -6  -4   0 17.9805 45.5738   1
  -6  -4  -1-19.7074 42.7610   1
  -6   5   2 72.8723 47.3616   1
  -6  -5   2 99.8277 47.0454   1
  -6   5   1 251.771 53.7830   1
  -6  -5   1 213.364 49.2847   1
  -6   5   0 38.3769 47.1456   1
  -6  -5   0 4.40924 44.8613   1
  -6  -5  -1-3.38919 40.0729   1
   0   0   0    0.00    0.00   0

TITL lcam16 in P2(1)/c
REM P2(1)/c (#14 in standard setting)
CELL 1.54184   6.857030  25.483844  13.743308  90.0000  92.4601  90.0000
ZERR    4.00   0.000940   0.003086   0.002429   0.0000   0.0142   0.0000
LATT  1
SYMM -x, y+1/2,-z+1/2
SFAC C H O Fe
UNIT 40.00 80.00 16.00 4.00
TREF
HKLF 4
END
;
_shelx_hkl_checksum                12513
_shelx_fab_file
;
-6 0 2 -0.3870 -1.1333
-6 1 1 -2.0414 -0.6446
-6 1 2 0.1207 -0.3089
-6 1 3 4.7581 0.5331
-6 2 1 4.2491 0.0048
-6 2 2 -0.5630 -0.0785
-6 2 3 -0.7436 -0.6120
-6 3 1 -0.9488 -0.4106
-6 3 2 -1.4579 0.4587
-6 3 3 2.0630 0.1292
-6 4 1 5.6737 0.0028
-6 4 2 -1.8131 0.2091
-6 5 1 1.0796 -0.4075
-6 5 2 -2.4396 0.4800
-5 0 2 -8.0952 1.8129
-5 0 4 -1.5891 -0.0464
-5 0 6 -2.2216 -0.7645
-5 1 1 10.3358 0.9410
-5 1 2 -1.0336 0.6897
-5 1 3 -0.3164 -0.6366
-5 1 4 0.4509 1.1171
-5 1 5 5.4935 0.3071
-5 1 6 -2.4982 0.6822
-5 1 7 -2.5050 0.3140
-5 2 1 1.4233 0.3071
-5 2 2 -5.1202 0.1011
-5 2 3 -0.1385 -0.1450
-5 2 4 0.9737 -0.2545
-5 2 5 2.6489 -0.2510
-5 2 6 -0.6999 0.0950
-5 2 7 0.5920 0.2554
-5 3 1 6.0189 0.1592
-5 3 2 0.7587 -0.2903
-5 3 3 -4.3166 0.2255
-5 3 4 -0.5552 -0.5039
-5 3 5 -1.6237 -0.0724
-5 3 6 -5.1605 -0.2469
-5 3 7 -0.6577 0.0604
-5 4 1 -1.7769 -0.1698
-5 4 2 3.0983 -0.0117
-5 4 3 -0.6052 0.3879
-5 4 4 6.3070 0.0112
-5 4 5 4.9322 0.2455
-5 4 6 3.6776 -0.0821
-5 4 7 0.2396 -0.0626
-5 5 1 -1.2015 -0.2402
-5 5 2 2.7331 0.1926
-5 5 3 -6.9332 0.0071
-5 5 4 -3.0937 0.0156
-5 5 5 -6.2249 -0.1062
-5 5 6 -4.1809 0.2011
-5 5 7 -2.9772 0.4532
-5 6 1 -0.9211 -0.0812
-5 6 2 5.0339 -0.0720
-5 6 3 0.6877 -0.1270
-5 6 4 3.6066 0.1414
-5 6 5 4.4538 -0.2905
-5 6 6 4.0982 -0.2201
-5 6 7 0.6849 -0.4991
-5 7 1 -1.6446 0.1904
-5 7 2 1.2426 -0.0745
-5 7 3 -0.1129 0.0436
-5 7 4 -3.3120 0.1009
-5 7 5 -2.3947 -0.0812
-5 7 6 -2.6274 0.2527
-5 8 1 2.5953 0.2119
-5 8 2 -0.3907 0.0162
-5 8 3 -0.1476 0.0621
-5 8 4 -1.9714 0.0338
-5 8 5 2.4947 0.0160
-5 8 6 1.1193 -0.3334
-5 9 1 2.2062 -0.1893
-5 9 2 2.2822 0.0787
-5 9 3 3.0220 -0.0137
-5 9 4 -1.2437 -0.2585
-5 9 5 -1.7617 0.1453
-5 10 1 2.8134 -0.1338
-5 10 2 -1.9695 0.0674
-5 10 3 -3.4178 0.0867
-5 10 4 0.6144 -0.0496
-5 10 5 1.6881 -0.1616
-5 11 1 3.8670 0.1561
-5 11 2 5.2578 0.2421
-5 11 3 0.2554 -0.1481
-5 11 4 -1.0210 -0.4355
-5 12 1 -1.5619 -0.1194
-5 12 2 -1.2281 0.0662
-5 12 3 -3.1297 0.0569
-5 13 1 1.8181 0.3201
-5 13 2 4.9713 0.4753
-4 0 2 11.7320 -2.3741
-4 0 4 1.4108 -0.0334
-4 0 6 -1.3615 1.2353
-4 0 8 -1.0959 1.8976
-4 1 1 0.0241 -1.2067
-4 1 2 -4.7345 -0.8801
-4 1 3 -9.4748 0.7786
-4 1 4 -0.2439 -1.4541
-4 1 5 0.9924 -0.2098
-4 1 6 1.6438 -1.2992
-4 1 7 0.5231 -0.8631
-4 1 8 1.1757 -0.1979
-4 1 9 -2.4883 -0.5111
-4 2 1 7.6783 -0.5203
-4 2 2 9.3571 -0.1696
-4 2 3 3.4181 0.3398
-4 2 4 3.3424 0.3433
-4 2 5 -0.4643 0.1142
-4 2 6 1.5207 -0.3875
-4 2 7 -3.8584 0.1445
-4 2 8 3.1271 0.0816
-4 2 9 -1.0864 -0.0845
-4 3 1 -7.2046 -0.1823
-4 3 2 -10.8986 0.3242
-4 3 3 -2.7243 -0.2712
-4 3 4 0.5411 0.7330
-4 3 5 -2.4266 0.2030
-4 3 6 2.3473 0.4937
-4 3 7 -4.6588 0.3838
-4 3 8 1.5854 0.0962
-4 3 9 -3.2199 -0.2003
-4 4 1 9.2947 0.2136
-4 4 2 -3.2308 -0.0245
-4 4 3 5.1746 -0.3976
-4 4 4 1.9667 0.0018
-4 4 5 -1.0138 -0.4760
-4 4 6 2.9203 -0.1421
-4 4 7 -1.1462 -0.2234
-4 4 8 2.3782 0.1571
-4 4 9 -0.0842 0.0346
-4 5 1 -0.6185 0.2687
-4 5 2 -7.2979 -0.2078
-4 5 3 6.3855 0.0202
-4 5 4 0.3396 -0.1618
-4 5 5 -2.8957 0.0518
-4 5 6 -1.1503 0.0176
-4 5 7 -0.4204 -0.2307
-4 5 8 -1.9310 -0.2226
-4 5 9 2.6867 -0.1084
-4 6 1 1.3185 0.0713
-4 6 2 -8.3608 0.1327
-4 6 3 2.2345 0.1631
-4 6 4 2.4082 -0.0574
-4 6 5 0.5629 0.4762
-4 6 6 -0.1139 0.1986
-4 6 7 1.7697 0.1117
-4 6 8 -6.7193 -0.2689
-4 6 9 3.5962 -0.1217
-4 7 1 2.2311 -0.3050
-4 7 2 1.4598 0.2324
-4 7 3 -0.0724 -0.0714
-4 7 4 1.0388 -0.2717
-4 7 5 -2.6526 0.0089
-4 7 6 -0.6152 0.1316
-4 7 7 4.3714 -0.0348
-4 7 8 -2.9450 -0.0604
-4 7 9 7.9324 1.0594
-4 8 1 -3.0004 -0.3213
-4 8 2 1.1897 -0.0694
-4 8 3 -2.6220 0.0370
-4 8 4 5.6469 -0.0073
-4 8 5 -0.9436 -0.2853
-4 8 6 -2.2418 0.1978
-4 8 7 -1.0280 -0.0622
-4 8 8 -5.8592 -0.8035
-4 9 1 -1.7785 0.2122
-4 9 2 2.7860 -0.1125
-4 9 3 -5.7114 0.1014
-4 9 4 1.7160 0.1240
-4 9 5 1.2099 0.0065
-4 9 6 2.1100 0.0281
-4 9 7 -0.3534 0.0178
-4 9 8 -0.0633 -0.0743
-4 10 1 -0.3531 0.0273
-4 10 2 3.4017 -0.0144
-4 10 3 -0.0694 0.2709
-4 10 4 1.5912 -0.1351
-4 10 5 -1.2255 -0.0741
-4 10 6 -1.9958 0.1740
-4 10 7 -1.4583 0.4459
-4 10 8 2.3799 -0.7420
-4 11 1 -1.4099 -0.1638
-4 11 2 -3.0975 -0.0890
-4 11 3 -2.2565 -0.0120
-4 11 4 -0.4513 0.2033
-4 11 5 3.9445 -0.0599
-4 11 6 0.8542 -0.4161
-4 11 7 -4.7860 0.2419
-4 12 1 3.8933 -0.2505
-4 12 2 -0.5561 0.1435
-4 12 3 3.0739 -0.0775
-4 12 4 -0.3134 -0.0376
-4 12 5 -1.7280 -0.2859
-4 12 6 -0.3237 0.2116
-4 12 7 -1.3013 0.3738
-4 13 1 4.1037 0.1763
-4 13 2 -5.6117 -0.0389
-4 13 3 0.1831 0.1067
-4 13 4 2.7847 0.2299
-4 13 5 0.9709 -0.2788
-4 13 6 2.1160 0.1410
-4 14 1 4.9192 0.0068
-4 14 2 -6.2972 -0.0554
-4 14 3 -0.8457 0.4131
-4 14 4 1.1356 -0.0812
-4 14 5 -4.5496 -0.2956
-4 14 6 0.2173 0.5720
-4 15 1 9.5959 -0.1084
-4 15 2 -2.6035 -0.1483
-4 15 3 2.5479 -0.0574
-4 15 4 5.4988 -0.4195
-4 15 5 -1.0830 -0.2342
-4 16 1 1.6314 -0.3845
-4 16 2 -7.4985 0.4084
-4 16 3 -2.5699 0.1884
-4 16 4 0.9353 0.0818
-4 17 1 6.0249 -0.1858
-4 17 2 -0.1009 0.6587
-3 0 2 2.4037 2.9460
-3 0 4 1.1959 0.0986
-3 0 6 1.5799 -1.5706
-3 0 8 2.5554 -2.5213
-3 0 10 -0.4497 -1.8446
-3 1 1 1.4074 1.6448
-3 1 2 1.0272 0.9540
-3 1 3 -2.5172 -0.8980
-3 1 4 0.2656 2.0900
-3 1 5 -0.6584 0.1534
-3 1 6 -2.4191 1.5148
-3 1 7 0.4412 0.9603
-3 1 8 0.0677 0.4005
-3 1 9 -3.1960 0.6346
-3 1 10 0.3259 -0.5390
-3 1 11 0.0453 0.3696
-3 2 1 -1.5386 0.5759
-3 2 2 0.4242 0.1432
-3 2 3 -1.7931 -0.3201
-3 2 4 -5.2262 -0.4469
-3 2 5 3.5184 -0.1636
-3 2 6 1.2484 0.5063
-3 2 7 3.4625 -0.1253
-3 2 8 -0.3165 0.5087
-3 2 9 -2.8768 0.1190
-3 2 10 2.2672 0.3035
-3 2 11 2.0607 -0.5296
-3 3 1 9.6771 0.1558
-3 3 2 0.8138 -0.4366
-3 3 3 0.8227 0.4157
-3 3 4 -2.4089 -1.0384
-3 3 5 4.1302 -0.3149
-3 3 6 -5.3591 -0.6820
-3 3 7 2.4252 -0.4263
-3 3 8 1.3727 -0.1488
-3 3 9 -2.5875 -0.7643
-3 3 10 -0.4724 0.5069
-3 3 11 -3.5115 0.2065
-3 4 1 4.9331 -0.2946
-3 4 2 5.9656 0.2213
-3 4 3 -5.9919 0.4818
-3 4 4 -9.2010 -0.0512
-3 4 5 8.8862 0.5959
-3 4 6 -0.3774 -0.0205
-3 4 7 -0.3182 0.3673
-3 4 8 -1.3362 0.0891
-3 4 9 -2.1495 -0.2152
-3 4 10 3.7060 -0.2583
-3 5 1 -1.4773 -0.4696
-3 5 2 2.2061 0.4387
-3 5 3 -2.3762 -0.0827
-3 5 4 -1.7746 0.1820
-3 5 5 6.0737 0.0410
-3 5 6 -2.1295 0.2754
-3 5 7 0.7580 0.4150
-3 5 8 3.4823 0.0850
-3 5 9 -3.6544 0.3355
-3 5 10 -2.8734 0.2326
-3 6 1 7.0425 -0.0777
-3 6 2 6.3678 -0.2225
-3 6 3 -9.5242 -0.2860
-3 6 4 -5.6638 0.0684
-3 6 5 5.3161 -0.8005
-3 6 6 -1.0805 -0.1697
-3 6 7 -3.3506 -0.1891
-3 6 8 3.3691 -0.0818
-3 6 9 -0.4868 0.0669
-3 6 10 2.3287 -0.5125
-3 7 1 -3.3139 0.5209
-3 7 2 3.9115 -0.2584
-3 7 3 1.3634 0.0845
-3 7 4 0.0054 0.1659
-3 7 5 4.5445 -0.0028
-3 7 6 0.2108 0.0547
-3 7 7 -2.3452 -0.2225
-3 7 8 2.4713 -0.0103
-3 7 9 -5.3411 0.0457
-3 7 10 -5.2141 -0.1887
-3 8 1 -0.7474 0.2972
-3 8 2 -5.3038 0.0504
-3 8 3 -1.5993 0.2770
-3 8 4 -4.4026 -0.0592
-3 8 5 0.9964 0.4396
-3 8 6 0.4382 0.1559
-3 8 7 -0.2167 0.1846
-3 8 8 2.8015 0.2535
-3 8 9 1.4192 0.1630
-3 8 10 2.6890 -0.3759
-3 9 1 6.6477 -0.4152
-3 9 2 1.0109 0.0832
-3 9 3 4.5881 -0.2075
-3 9 4 -0.7335 -0.3377
-3 9 5 1.8647 0.0673
-3 9 6 -0.9969 -0.2546
-3 9 7 0.5286 -0.0991
-3 9 8 1.2456 -0.0315
-3 9 9 -3.3404 0.3140
-3 10 1 -5.7866 -0.2761
-3 10 2 -6.1859 0.2425
-3 10 3 2.2266 -0.2603
-3 10 4 -2.6187 -0.0401
-3 10 5 -2.3341 -0.0442
-3 10 6 0.3282 -0.0244
-3 10 7 -0.2751 -0.1681
-3 10 8 -2.6307 -0.1316
-3 10 9 1.3945 0.1422
-3 11 1 8.3676 0.2007
-3 11 2 0.7023 0.1764
-3 11 3 0.7882 0.1368
-3 11 4 5.1062 0.1820
-3 11 5 -0.6406 -0.0050
-3 11 6 0.5046 0.4207
-3 11 7 4.1176 0.0593
-3 11 8 2.5888 -0.0463
-3 11 9 -0.6253 0.3794
-3 12 1 -4.1248 0.1296
-3 12 2 -1.1056 -0.2859
-3 12 3 -3.3637 0.1940
-3 12 4 0.8613 -0.1135
-3 12 5 -4.9118 -0.2528
-3 12 6 0.4525 0.1342
-3 12 7 -1.3759 0.0467
-3 12 8 -2.8415 -0.4877
-3 13 1 3.0242 -0.0548
-3 13 2 0.8294 -0.2471
-3 13 3 -1.9094 0.1725
-3 13 4 6.3595 -0.1441
-3 13 5 -3.8713 -0.2432
-3 13 6 0.8599 -0.0913
-3 13 7 2.7016 0.4431
-3 13 8 2.1927 -0.1581
-3 14 1 0.1682 -0.2149
-3 14 2 1.5620 0.2263
-3 14 3 -1.8360 0.1600
-3 14 4 3.7369 0.1073
-3 14 5 -2.2009 0.0736
-3 14 6 2.1042 0.0459
-3 14 7 -0.7499 0.2655
-3 14 8 -2.0315 -0.8258
-3 15 1 -1.5693 -0.3328
-3 15 2 -1.5858 0.0500
-3 15 3 -1.9816 0.0238
-3 15 4 -0.8064 0.1865
-3 15 5 -4.9550 -0.3040
-3 15 6 2.5352 -0.3881
-3 15 7 2.4312 0.2998
-3 16 1 1.5354 -0.0487
-3 16 2 0.0132 0.0521
-3 16 3 3.7392 -0.1022
-3 16 4 3.2672 -0.0300
-3 16 5 -0.6965 0.0930
-3 16 6 0.7868 0.1673
-3 17 1 1.4110 -0.0055
-3 17 2 -2.9220 -0.2735
-3 17 3 -0.3256 0.3930
-3 17 4 -4.8769 0.3685
-3 17 5 -2.0807 -0.2216
-3 17 6 5.7295 -0.6202
-3 18 1 0.2360 0.2258
-3 18 2 -2.4408 -0.2307
-3 18 3 6.0456 -0.2890
-3 18 4 1.0581 -0.1681
-3 18 5 -1.7996 -0.2080
-3 19 1 2.8693 0.1710
-3 19 2 -3.5711 0.0124
-3 19 3 0.7693 0.5127
-3 20 1 0.3086 0.1097
-2 0 2 -6.9992 -3.5458
-2 0 4 20.5948 -0.1213
-2 0 6 -2.2779 1.7186
-2 0 8 9.0801 2.8671
-2 0 10 -1.2408 2.1670
-2 1 1 19.3711 -1.9726
-2 1 2 -4.8703 -1.2557
-2 1 3 -7.3219 1.1311
-2 1 4 -7.2150 -2.3734
-2 1 5 -9.7435 -0.1254
-2 1 6 -2.1573 -1.7515
-2 1 7 -4.9947 -1.2100
-2 1 8 1.5737 -0.5527
-2 1 9 0.9923 -0.6426
-2 1 10 -3.4395 0.5624
-2 1 11 -4.0518 -0.5976
-2 2 1 9.2670 -0.7016
-2 2 2 -3.6281 -0.1655
-2 2 3 9.7039 0.4045
-2 2 4 17.7926 0.5452
-2 2 5 6.7801 0.2392
-2 2 6 -5.0791 -0.5425
-2 2 7 0.6587 0.0709
-2 2 8 8.4285 -0.6247
-2 2 9 1.4178 -0.0738
-2 2 10 -3.2997 -0.1881
-2 2 11 3.9299 0.1924
-2 3 1 -4.0228 -0.2255
-2 3 2 -2.4087 0.5543
-2 3 3 -4.4929 -0.5304
-2 3 4 -8.8112 1.2017
-2 3 5 -2.8139 0.3639
-2 3 6 -7.7502 0.7086
-2 3 7 -2.6361 0.4113
-2 3 8 3.2861 0.2842
-2 3 9 1.7325 0.9183
-2 3 10 -6.1719 -0.1340
-2 3 11 -0.5029 -0.2666
-2 4 1 -5.5847 0.2366
-2 4 2 -1.6708 -0.2482
-2 4 3 5.9654 -0.5343
-2 4 4 7.4743 0.1462
-2 4 5 4.2143 -0.6602
-2 4 6 -6.3391 -0.0290
-2 4 7 6.1895 -0.4952
-2 4 8 2.8665 -0.0671
-2 4 9 -0.0669 0.1387
-2 4 10 -1.5988 0.2117
-2 4 11 3.0478 0.0302
-2 5 1 -12.2888 0.6930
-2 5 2 6.5491 -0.5082
-2 5 3 4.4485 0.0316
-2 5 4 0.0824 -0.1592
-2 5 5 0.6008 -0.0164
-2 5 6 -12.0212 -0.3754
-2 5 7 3.2724 -0.4367
-2 5 8 1.9553 -0.1214
-2 5 9 2.2581 -0.3782
-2 5 10 -2.2868 0.2785
-2 5 11 -2.3160 -0.1856
-2 6 1 -10.0178 0.1227
-2 6 2 -2.3174 0.3489
-2 6 3 -1.7157 0.3517
-2 6 4 -2.6667 -0.1627
-2 6 5 2.7972 0.8640
-2 6 6 -3.6311 0.1106
-2 6 7 5.2183 0.2618
-2 6 8 -5.8875 0.2495
-2 6 9 2.2686 -0.0042
-2 6 10 0.7349 -0.1061
-2 6 11 -5.1490 -0.4368
-2 7 1 -4.7887 -0.6799
-2 7 2 6.0020 0.3359
-2 7 3 7.9197 -0.0538
-2 7 4 3.2857 -0.1602
-2 7 5 -0.3998 0.0602
-2 7 6 -5.5270 -0.0294
-2 7 7 6.8117 0.1841
-2 7 8 -1.3980 -0.1497
-2 7 9 5.8357 0.1671
-2 7 10 1.8927 0.1547
-2 7 11 -1.3000 0.8647
-2 8 1 3.3855 -0.3794
-2 8 2 -2.4571 0.0736
-2 8 3 -5.7986 -0.3735
-2 8 4 -2.3301 -0.0680
-2 8 5 1.7184 -0.4671
-2 8 6 -2.5239 -0.1515
-2 8 7 -3.6183 -0.2572
-2 8 8 -4.6670 -0.0277
-2 8 9 7.1531 0.0189
-2 8 10 -7.4395 -0.6435
-2 8 11 -9.6158 0.6969
-2 9 1 3.2320 0.3957
-2 9 2 0.3117 0.0161
-2 9 3 1.7699 0.2671
-2 9 4 1.0010 0.1973
-2 9 5 0.1020 -0.0878
-2 9 6 5.6279 0.4023
-2 9 7 -0.7909 -0.1112
-2 9 8 -3.6899 0.0152
-2 9 9 8.8147 -0.0061
-2 9 10 2.2466 -0.4138
-2 10 1 10.5022 0.2336
-2 10 2 0.4956 -0.2517
-2 10 3 -2.0220 0.4556
-2 10 4 2.1593 0.0880
-2 10 5 -1.0351 0.0922
-2 10 6 -0.7629 0.0517
-2 10 7 -6.1061 0.1131
-2 10 8 4.5681 0.2263
-2 10 9 5.9915 -0.0249
-2 10 10 -12.4170 -0.0448
-2 11 1 0.9726 -0.2562
-2 11 2 -4.5709 -0.2584
-2 11 3 -4.6241 -0.1667
-2 11 4 -1.2853 -0.3260
-2 11 5 1.9301 -0.0163
-2 11 6 6.0485 -0.3183
-2 11 7 -8.2421 -0.0197
-2 11 8 -2.1763 0.0600
-2 11 9 6.3391 0.0506
-2 11 10 0.2010 -0.2610
-2 12 1 7.5374 -0.2488
-2 12 2 4.2231 0.2608
-2 12 3 1.5929 -0.1227
-2 12 4 1.5766 0.1332
-2 12 5 -0.0752 0.0118
-2 12 6 -0.3938 -0.1446
-2 12 7 -2.0228 0.0333
-2 12 8 4.5069 -0.1798
-2 12 9 2.9507 0.0266
-2 12 10 -5.2468 0.1109
-2 13 1 -1.1186 0.0632
-2 13 2 -2.5697 0.2867
-2 13 3 -2.8310 -0.0003
-2 13 4 -2.0629 0.3717
-2 13 5 2.8069 0.1160
-2 13 6 -1.0595 0.1394
-2 13 7 -1.4085 -0.0122
-2 13 8 -0.8230 -0.0058
-2 13 9 2.7935 0.2818
-2 14 1 0.0135 0.1030
-2 14 2 1.3138 -0.3415
-2 14 3 2.0155 -0.1392
-2 14 4 0.3834 -0.1949
-2 14 5 3.4244 -0.1672
-2 14 6 -4.6467 0.2652
-2 14 7 1.6516 0.0260
-2 14 8 -2.2891 -0.5748
-2 14 9 4.4071 0.2623
-2 15 1 0.8917 0.1740
-2 15 2 -0.3138 -0.2071
-2 15 3 -0.7894 0.1272
-2 15 4 -2.5610 -0.2597
-2 15 5 1.4852 -0.0713
-2 15 6 -3.9752 0.0517
-2 15 7 5.8135 0.1178
-2 15 8 -2.5475 -0.2553
-2 16 1 -2.5983 0.1251
-2 16 2 0.2294 0.2816
-2 16 3 2.7997 0.2128
-2 16 4 1.5435 -0.0858
-2 16 5 0.5913 0.2005
-2 16 6 -4.2344 0.4492
-2 16 7 3.1583 -0.1689
-2 16 8 -2.0404 -1.3477
-2 17 1 -0.8089 -0.4168
-2 17 2 -0.8396 0.2052
-2 17 3 1.3994 -0.2867
-2 17 4 2.0114 -0.2071
-2 17 5 -0.6551 -0.0368
-2 17 6 -1.7609 0.2742
-2 17 7 1.6905 0.0163
-2 18 1 -1.2367 -0.0625
-2 18 2 -3.0196 0.2297
-2 18 3 -0.9045 -0.3034
-2 18 4 -1.9200 -0.2941
-2 18 5 -3.2553 0.2391
-2 18 6 0.7739 0.5279
-2 19 1 1.4822 0.4124
-2 19 2 2.1118 0.1896
-2 19 3 7.1691 0.1843
-2 19 4 3.9191 -0.0519
-2 19 5 -0.6305 0.2383
-2 19 6 -1.9921 -0.3641
-2 20 1 -2.2477 0.2364
-2 20 2 -5.6085 -0.4275
-2 20 3 -2.9467 -0.2682
-2 20 4 -3.4908 -0.4038
-2 21 1 1.3346 0.8020
-2 21 2 2.6657 -0.0870
-2 21 3 3.5372 0.3138
-1 0 2 18.6081 3.8961
-1 0 4 5.2311 0.2435
-1 0 6 4.7808 -1.6946
-1 0 8 -3.4706 -2.9994
-1 0 10 1.9817 -2.2120
-1 0 12 1.7570 -0.6075
-1 1 1 31.9171 2.3767
-1 1 2 1.7544 1.4019
-1 1 3 -42.4386 -1.5456
-1 1 4 5.2750 2.5176
-1 1 5 17.1457 0.2633
-1 1 6 -3.9090 2.0116
-1 1 7 -10.3585 1.1723
-1 1 8 -0.1502 0.4019
-1 1 9 1.9164 0.7030
-1 1 10 -1.7607 -0.4414
-1 1 11 0.1457 0.6435
-1 1 12 -2.3831 -1.1861
-1 2 1 6.9057 0.7889
-1 2 2 21.3005 -0.0389
-1 2 3 -17.2006 -0.4738
-1 2 4 4.6650 -0.5096
-1 2 5 8.4175 -0.2140
-1 2 6 0.2190 0.6016
-1 2 7 -3.3909 -0.0786
-1 2 8 -0.7535 0.5630
-1 2 9 3.5466 -0.0187
-1 2 10 4.5640 0.2559
-1 2 11 3.4487 0.2355
-1 2 12 0.6437 0.2345
-1 3 1 8.9092 0.8228
-1 3 2 8.9195 -0.7325
-1 3 3 -31.8549 0.3269
-1 3 4 9.3033 -1.3035
-1 3 5 15.5946 -0.2451
-1 3 6 -5.9619 -0.7590
-1 3 7 -2.9100 -0.4898
-1 3 8 0.9369 -0.3471
-1 3 9 -4.3117 -0.7787
-1 3 10 -0.0310 0.2552
-1 3 11 -1.5359 -0.3416
-1 3 12 -5.4447 0.2969
-1 4 1 5.8743 -0.1305
-1 4 2 10.1651 0.2813
-1 4 3 -23.6042 0.4941
-1 4 4 3.2500 -0.0906
-1 4 5 12.0349 0.8883
-1 4 6 -11.1429 -0.0355
-1 4 7 -6.4555 0.4370
-1 4 8 2.2209 0.0672
-1 4 9 1.2375 -0.1808
-1 4 10 5.4464 -0.1202
-1 4 11 2.9656 -0.2778
-1 4 12 0.3340 0.4617
-1 5 1 16.6045 -0.8449
-1 5 2 14.0107 0.5294
-1 5 3 -13.4175 -0.1844
-1 5 4 3.4237 0.2273
-1 5 5 15.9690 0.1312
-1 5 6 -2.3084 0.3872
-1 5 7 4.9636 0.3579
-1 5 8 -0.4569 0.1719
-1 5 9 -3.9538 0.4908
-1 5 10 1.8907 -0.2618
-1 5 11 -2.4130 -0.1569
-1 5 12 -6.3264 0.6388
-1 6 1 -7.1264 -0.1580
-1 6 2 -12.6227 -0.2753
-1 6 3 -12.3497 -0.6195
-1 6 4 0.1873 0.1855
-1 6 5 6.3002 -0.8365
-1 6 6 -16.4506 -0.2137
-1 6 7 -0.7109 -0.3339
-1 6 8 0.7358 -0.0825
-1 6 9 0.6260 0.0496
-1 6 10 2.2331 -0.1268
-1 6 11 5.6138 -0.0733
-1 7 1 29.3524 0.6084
-1 7 2 8.3497 -0.1658
-1 7 3 -1.2847 0.1799
-1 7 4 3.1698 0.1503
-1 7 5 12.5819 0.0030
-1 7 6 -1.3931 0.0389
-1 7 7 4.2612 -0.3396
-1 7 8 -4.2231 0.1333
-1 7 9 -0.2294 -0.0448
-1 7 10 -3.2168 -0.2722
-1 7 11 -1.8013 -0.3619
-1 8 1 -14.4200 0.3486
-1 8 2 -11.7406 -0.2281
-1 8 3 -6.6011 0.4766
-1 8 4 -1.8652 0.0809
-1 8 5 -4.8509 0.5100
-1 8 6 -4.8056 0.1067
-1 8 7 5.6655 0.3196
-1 8 8 -1.2625 0.1391
-1 8 9 2.1312 0.0713
-1 8 10 3.0703 0.1353
-1 8 11 6.5936 -0.6896
-1 9 1 10.7619 -0.4255
-1 9 2 7.4478 -0.0495
-1 9 3 1.3860 -0.2353
-1 9 4 13.5427 -0.3838
-1 9 5 0.2465 0.1103
-1 9 6 -1.9059 -0.3700
-1 9 7 -1.4575 0.0546
-1 9 8 -2.1886 0.0331
-1 9 9 -2.2983 0.0748
-1 9 10 -5.1972 0.0704
-1 9 11 -0.5737 0.2167
-1 10 1 -11.4494 -0.2775
-1 10 2 -2.6928 0.3141
-1 10 3 -13.6567 -0.2659
-1 10 4 -0.3317 -0.0458
-1 10 5 -6.0982 -0.2187
-1 10 6 6.9677 -0.0538
-1 10 7 2.2144 -0.1723
-1 10 8 -0.3201 -0.1574
-1 10 9 1.6215 0.0476
-1 10 10 5.1655 -0.1585
-1 10 11 1.8137 -0.0825
-1 11 1 -0.3904 0.2061
-1 11 2 10.9526 0.2484
-1 11 3 2.9995 0.0774
-1 11 4 8.9400 0.3663
-1 11 5 -4.8202 0.0199
-1 11 6 -1.8933 0.4043
-1 11 7 -1.8122 0.0010
-1 11 8 0.1943 0.0528
-1 11 9 -4.9104 -0.2480
-1 11 10 -0.5831 -0.0401
-1 12 1 -7.6829 0.1949
-1 12 2 -3.1540 -0.2206
-1 12 3 -5.9799 0.1314
-1 12 4 -0.1591 -0.1814
-1 12 5 2.9025 -0.1169
-1 12 6 1.3829 0.2146
-1 12 7 -0.0464 0.0693
-1 12 8 1.8053 0.1359
-1 12 9 1.4100 -0.0649
-1 12 10 2.6018 -0.0740
-1 13 1 0.0647 0.0517
-1 13 2 3.3144 -0.2473
-1 13 3 -0.1051 0.0372
-1 13 4 -3.8305 -0.3377
-1 13 5 4.1111 -0.1545
-1 13 6 -1.7826 -0.2354
-1 13 7 -0.7742 0.1673
-1 13 8 -3.6983 -0.1586
-1 13 9 -2.5069 -0.0139
-1 13 10 2.5897 0.2369
-1 14 1 -2.3399 -0.1557
-1 14 2 1.3720 0.3425
-1 14 3 3.1881 0.1075
-1 14 4 -2.4319 0.0532
-1 14 5 2.2138 0.1242
-1 14 6 -3.7501 -0.0902
-1 14 7 3.0765 0.1712
-1 14 8 2.7501 -0.1397
-1 14 9 2.0260 -0.1563
-1 15 1 -2.8006 -0.1733
-1 15 2 -3.3246 0.3161
-1 15 3 -2.1856 -0.0530
-1 15 4 0.7531 0.2101
-1 15 5 6.5157 -0.0582
-1 15 6 -0.2638 0.1427
-1 15 7 -3.1775 0.1070
-1 15 8 -4.6709 0.0688
-1 15 9 0.8048 0.0446
-1 16 1 2.1794 -0.1015
-1 16 2 1.4517 -0.1083
-1 16 3 -0.7388 -0.1916
-1 16 4 -2.7105 -0.1020
-1 16 5 -3.4771 -0.1829
-1 16 6 -0.2658 -0.0477
-1 16 7 1.6068 -0.1955
-1 16 8 0.2280 0.5793
-1 17 1 -0.6404 0.2106
-1 17 2 -3.3571 -0.1741
-1 17 3 1.1949 0.2184
-1 17 4 5.4886 -0.1460
-1 17 5 2.2662 0.0266
-1 17 6 2.2529 -0.0038
-1 17 7 0.1674 -0.1902
-1 17 8 -0.3862 0.1068
-1 18 1 1.5798 0.2161
-1 18 2 -1.8895 0.0744
-1 18 3 -1.5302 0.2807
-1 18 4 -1.9334 0.0739
-1 18 5 -4.6766 0.3527
-1 18 6 -2.4584 -0.2920
-1 18 7 -2.5174 -0.1316
-1 19 1 0.9808 -0.2850
-1 19 2 -1.8806 -0.0274
-1 19 3 2.6869 -0.2611
-1 19 4 4.0187 -0.1128
-1 19 5 2.8807 -0.0017
-1 19 6 4.6894 -0.0518
-1 20 1 -1.5706 -0.1410
-1 20 2 -2.9519 0.0156
-1 20 3 0.0240 -0.4722
-1 20 4 -3.0197 0.3357
-1 20 5 -4.9854 0.1215
-1 21 1 2.9696 0.5829
-1 21 2 -0.4911 0.4595
-1 21 3 4.0445 0.1112
-1 21 4 1.5265 0.3605
-1 22 1 -2.5473 -0.1296
-1 22 2 -3.4894 -0.8789
-1 22 3 2.3653 -0.5978
0 0 2 63.0226 -3.9546
0 0 4 -26.8296 -0.3778
0 0 6 9.4391 1.6145
0 0 8 1.1494 2.9050
0 0 10 -0.0167 2.0842
0 0 12 2.3888 0.6610
0 1 1 -129.0453 -0.4098
0 1 2 21.3862 -1.6506
0 1 3 19.9010 1.3009
0 1 4 1.9825 -2.5010
0 1 5 -9.9715 -0.3113
0 1 6 2.1952 -1.8817
0 1 7 4.2872 -1.0989
0 1 8 1.5711 -0.4024
0 1 9 -3.3845 -0.7099
0 1 10 0.1255 0.3538
0 1 11 -1.5549 -0.5790
0 1 12 0.0275 1.2604
0 2 0 103.8588 2.4608
0 2 1 -23.7095 -0.2433
0 2 2 35.2644 0.3752
0 2 3 -16.3770 0.4273
0 2 4 -13.8519 0.4994
0 2 5 -2.8101 0.2244
0 2 6 7.6440 -0.5842
0 2 7 -1.1354 0.0755
0 2 8 -1.7941 -0.4384
0 2 9 -3.1074 0.0346
0 2 10 0.4084 -0.3022
0 2 11 0.3732 -0.2484
0 2 12 1.4589 -0.2992
0 3 1 -39.7332 -1.1441
0 3 2 27.0497 0.7752
0 3 3 12.1993 -0.3824
0 3 4 -2.2484 1.2753
0 3 5 -11.0488 0.1729
0 3 6 8.6644 0.7491
0 3 7 7.0651 0.4479
0 3 8 1.2016 0.3512
0 3 9 -0.5550 0.7699
0 3 10 -0.7331 -0.2738
0 3 11 -0.9925 0.3290
0 3 12 1.3031 -0.2593
0 4 0 3.6958 -0.8639
0 4 1 -14.7349 0.0862
0 4 2 -1.1925 -0.1747
0 4 3 0.5783 -0.7012
0 4 4 -2.0783 0.1462
0 4 5 -8.3719 -0.8702
0 4 6 0.0083 -0.0370
0 4 7 -2.9979 -0.3529
0 4 8 -5.5169 -0.0519
0 4 9 -0.9566 0.1585
0 4 10 0.6094 0.1215
0 4 11 -2.2027 0.2144
0 4 12 0.1974 -0.2560
0 5 1 11.3733 0.6051
0 5 2 4.5795 -0.1853
0 5 3 3.2290 0.3309
0 5 4 -4.5430 -0.3039
0 5 5 2.1852 -0.1229
0 5 6 14.1170 -0.4492
0 5 7 6.2210 -0.3079
0 5 8 0.4659 -0.0943
0 5 9 1.7855 -0.3800
0 5 10 0.9713 0.1794
0 5 11 -1.3007 -0.1462
0 5 12 3.5410 -0.6130
0 6 0 -16.4653 0.2094
0 6 1 -5.0254 0.0020
0 6 2 -0.0994 -0.0422
0 6 3 5.1237 0.7524
0 6 4 -5.0444 -0.1253
0 6 5 -10.8058 0.7916
0 6 6 -4.9629 0.1180
0 6 7 -6.3031 0.3476
0 6 8 -3.1102 0.0245
0 6 9 -1.1541 -0.0050
0 6 10 0.4854 0.1871
0 6 11 -5.1355 0.0178
0 6 12 2.3625 0.1303
0 7 1 3.5195 -0.4113
0 7 2 5.1197 0.0178
0 7 3 -5.2491 -0.2003
0 7 4 -1.0845 -0.1445
0 7 5 9.1059 0.0722
0 7 6 11.0831 -0.1001
0 7 7 -1.0247 0.2937
0 7 8 3.4568 0.0254
0 7 9 1.2748 0.1092
0 7 10 2.9697 0.1324
0 7 11 -3.2467 0.0363
0 8 0 -4.9686 0.1174
0 8 1 -6.7199 -0.2690
0 8 2 9.6024 0.2443
0 8 3 0.7970 -0.3688
0 8 4 -3.0997 -0.0773
0 8 5 -0.4397 -0.5920
0 8 6 -1.0250 -0.0640
0 8 7 -7.9690 -0.3576
0 8 8 2.7347 -0.0474
0 8 9 -2.1536 -0.0596
0 8 10 0.6011 -0.2027
0 8 11 -1.1091 0.6140
0 9 1 -1.3457 0.3997
0 9 2 2.6525 -0.0421
0 9 3 -7.4761 0.1245
0 9 4 -11.0632 0.5337
0 9 5 4.9648 -0.0957
0 9 6 3.9978 0.2474
0 9 7 -5.2881 -0.1841
0 9 8 3.8921 0.1104
0 9 9 -1.0202 -0.0428
0 9 10 0.6626 -0.1220
0 9 11 -2.5569 -0.2461
0 10 0 -4.8836 -0.3978
0 10 1 0.4942 0.2704
0 10 2 7.9907 -0.1969
0 10 3 10.6154 0.2335
0 10 4 -2.0090 0.0161
0 10 5 8.2322 0.2336
0 10 6 0.3789 0.1061
0 10 7 -4.9976 0.2297
0 10 8 4.3681 0.2177
0 10 9 -0.1838 -0.0982
0 10 10 1.2473 0.0016
0 10 11 1.7627 0.0970
0 11 1 -0.9485 -0.1921
0 11 2 -7.3218 -0.1887
0 11 3 -2.5083 -0.0779
0 11 4 -11.8885 -0.3981
0 11 5 2.3020 -0.0081
0 11 6 1.3396 -0.4799
0 11 7 -2.8802 0.0451
0 11 8 -0.8372 -0.0681
0 11 9 -1.9266 0.2902
0 11 10 0.0562 0.0261
0 12 0 -2.0168 0.3804
0 12 1 5.9425 -0.3286
0 12 2 4.2348 0.2766
0 12 3 5.3716 -0.0129
0 12 4 -1.6327 0.0824
0 12 5 1.9544 0.0290
0 12 6 2.3758 -0.2328
0 12 7 -0.0938 0.0149
0 12 8 1.4869 -0.2191
0 12 9 2.0132 0.0953
0 12 10 0.4069 0.0840
0 13 1 -1.5966 -0.0470
0 13 2 -3.2621 0.3256
0 13 3 -0.0747 0.0164
0 13 4 0.6304 0.3280
0 13 5 -5.2290 0.1389
0 13 6 1.8160 0.3608
0 13 7 -1.0515 -0.1154
0 13 8 -3.0488 0.0717
0 13 9 0.2932 -0.0209
0 13 10 1.6519 -0.2789
0 14 0 0.6031 -0.3309
0 14 1 3.4097 0.0333
0 14 2 2.0723 -0.2604
0 14 3 -1.3137 -0.0450
0 14 4 4.1257 -0.1437
0 14 5 -2.0774 -0.2927
0 14 6 4.4506 0.2251
0 14 7 -0.6179 -0.1850
0 14 8 -0.6261 0.1494
0 14 9 0.3776 0.2187
0 15 1 -2.9112 0.1845
0 15 2 -1.7233 -0.3026
0 15 3 -2.7352 0.0963
0 15 4 -0.5011 -0.2242
0 15 5 -4.8023 -0.0625
0 15 6 3.0913 -0.1213
0 15 7 0.5011 -0.1267
0 15 8 1.2259 -0.0067
0 15 9 1.3441 -0.1643
0 16 0 3.3743 0.2369
0 16 1 0.6608 0.1908
0 16 2 4.3542 0.1720
0 16 3 3.2848 0.2255
0 16 4 1.3312 0.0778
0 16 5 -1.3086 0.2963
0 16 6 -1.9841 0.0407
0 16 7 -3.7994 0.2089
0 16 8 0.4331 -0.6807
0 17 1 -3.1633 -0.2538
0 17 2 -1.0293 0.1317
0 17 3 -1.3897 -0.1981
0 17 4 -1.1614 0.0644
0 17 5 5.3584 -0.0658
0 17 6 3.3395 -0.1583
0 17 7 0.5527 0.7003
0 17 8 3.3837 0.0300
0 18 0 -0.7762 -0.0334
0 18 1 -0.6809 -0.1161
0 18 2 0.6021 -0.0491
0 18 3 0.1335 -0.3718
0 18 4 -5.4544 0.0010
0 18 5 -1.7864 -0.2869
0 18 6 -4.1365 -0.0978
0 18 7 -2.8584 0.2363
0 19 1 2.7938 0.2951
0 19 2 0.1285 0.1290
0 19 3 4.0750 0.2372
0 19 4 1.7930 0.1453
0 19 5 5.8295 -0.1191
0 19 6 0.1417 0.1541
0 19 7 -1.0588 0.5197
0 20 0 -1.1365 -0.1340
0 20 1 2.5580 0.1244
0 20 2 -4.1302 -0.1192
0 20 3 -1.6352 0.3712
0 20 4 -4.6734 -0.1298
0 20 5 0.9740 -0.2672
0 20 6 -1.4373 0.1105
0 21 1 -1.2466 -0.1949
0 21 2 -1.8399 -0.3549
0 21 3 3.7596 -0.1293
0 21 4 1.0780 -0.5018
0 21 5 1.7696 -0.0475
0 22 0 7.6584 0.1329
0 22 1 3.3228 0.1157
0 22 2 -0.4111 0.5597
0 22 3 -2.3289 0.6259
1 0 0 -56.6283 4.5843
1 0 2 -21.3793 3.4984
1 0 4 20.2656 0.6771
1 0 6 0.1904 -1.5965
1 0 8 -2.1696 -2.5166
1 0 10 -0.4045 -1.9285
1 0 12 0.7797 -0.5916
1 1 0 2.8250 -0.4410
1 1 1 35.6981 -1.8681
1 1 2 -6.8966 1.7801
1 1 3 -14.3171 -0.8129
1 1 4 -1.8941 2.3489
1 1 5 1.6484 0.1706
1 1 6 -2.7526 1.7058
1 1 7 -8.8259 0.9051
1 1 8 -2.8086 0.4750
1 1 9 7.7609 0.6114
1 1 10 -5.0146 -0.4383
1 1 11 -3.2507 0.6604
1 1 12 -3.3179 -0.9324
1 2 0 -24.7102 -0.2080
1 2 1 -4.0168 -0.2625
1 2 2 6.8057 -0.6823
1 2 3 2.2398 -0.3386
1 2 4 6.9970 -0.2725
1 2 5 1.8410 -0.1887
1 2 6 0.9626 0.5263
1 2 7 2.2425 -0.0866
1 2 8 1.4286 0.4616
1 2 9 7.8035 -0.0267
1 2 10 -0.0498 0.2052
1 2 11 4.2054 0.2475
1 2 12 0.8056 0.1795
1 3 0 15.1040 0.2483
1 3 1 -22.8382 0.9088
1 3 2 14.7955 -0.7804
1 3 3 -17.2650 0.5245
1 3 4 10.8876 -1.1299
1 3 5 7.5462 -0.1979
1 3 6 -7.6927 -0.8656
1 3 7 -10.2272 -0.4249
1 3 8 -0.6813 -0.2702
1 3 9 2.4632 -0.6661
1 3 10 -4.6540 0.2690
1 3 11 -2.8622 -0.2872
1 3 12 -3.3188 -0.2029
1 4 0 9.4060 0.3668
1 4 1 -27.4741 0.0033
1 4 2 43.5112 -0.0125
1 4 3 -32.9708 0.8352
1 4 4 -1.5512 -0.1565
1 4 5 0.9810 0.7913
1 4 6 5.1966 0.0729
1 4 7 0.2814 0.4108
1 4 8 3.4098 -0.0977
1 4 9 2.6478 -0.2435
1 4 10 0.2654 -0.0397
1 4 11 -0.7062 0.2009
1 4 12 3.1380 0.4287
1 5 0 12.2990 0.3345
1 5 1 -40.3032 -0.3380
1 5 2 40.1617 -0.0982
1 5 3 -18.8698 -0.3084
1 5 4 22.6116 0.4327
1 5 5 -4.0559 0.1242
1 5 6 -7.8736 0.3553
1 5 7 -5.1529 0.3525
1 5 8 3.0787 0.0563
1 5 9 0.2403 0.4129
1 5 10 0.1919 -0.1616
1 5 11 -2.0388 -0.1684
1 6 0 -7.0153 -0.3373
1 6 1 -13.4153 0.0664
1 6 2 31.3077 0.1814
1 6 3 -30.9675 -0.7740
1 6 4 5.7035 0.0348
1 6 5 1.9823 -0.7985
1 6 6 8.5208 -0.0710
1 6 7 -1.0983 -0.3094
1 6 8 -0.4952 -0.1066
1 6 9 1.1035 -0.0756
1 6 10 -1.7007 -0.0286
1 6 11 -1.6107 0.4989
1 7 0 -14.9059 -0.3439
1 7 1 -7.9400 0.3317
1 7 2 7.4844 0.0856
1 7 3 -5.9468 0.1126
1 7 4 4.5274 0.1931
1 7 5 -10.1980 -0.0389
1 7 6 -2.8418 0.1666
1 7 7 0.8252 -0.3350
1 7 8 0.2216 -0.0706
1 7 9 0.9210 -0.0801
1 7 10 -1.1856 -0.0888
1 7 11 1.0116 -0.3175
1 8 0 -16.8709 -0.0876
1 8 1 19.5267 0.0850
1 8 2 1.9712 -0.1362
1 8 3 4.7945 0.3597
1 8 4 0.4955 0.0686
1 8 5 3.7030 0.5371
1 8 6 3.2279 0.0808
1 8 7 0.3560 0.3469
1 8 8 -1.8664 0.1290
1 8 9 1.3836 -0.0749
1 8 10 -1.6447 0.2078
1 8 11 0.3207 -0.4877
1 9 0 -21.0916 0.2400
1 9 1 4.9705 -0.3261
1 9 2 -14.7443 -0.0215
1 9 3 3.8614 -0.1839
1 9 4 -6.3754 -0.5480
1 9 5 -0.0215 0.1532
1 9 6 -1.6669 -0.2400
1 9 7 1.9870 0.0503
1 9 8 -0.8961 -0.1155
1 9 9 -0.3033 0.1236
1 9 10 -0.1213 0.3789
1 9 11 0.9153 0.1909
1 10 0 -1.9237 0.3389
1 10 1 12.1994 -0.2796
1 10 2 -1.8824 0.1799
1 10 3 5.1630 -0.0971
1 10 4 -1.9460 -0.0338
1 10 5 1.5858 -0.2093
1 10 6 -1.8398 -0.1124
1 10 7 2.1890 -0.1445
1 10 8 -0.6036 -0.2260
1 10 9 -2.3119 -0.0385
1 10 10 0.9386 -0.1217
1 11 0 -6.9671 0.0045
1 11 1 -0.2399 0.1691
1 11 2 0.7089 0.0807
1 11 3 -3.3377 0.1055
1 11 4 1.7489 0.4224
1 11 5 1.8971 0.0299
1 11 6 -1.5796 0.3970
1 11 7 0.6432 -0.0184
1 11 8 2.5979 0.0039
1 11 9 -1.3649 -0.1307
1 11 10 2.2705 0.2205
1 12 0 2.3554 -0.3607
1 12 1 -2.3404 0.1923
1 12 2 1.8198 -0.2625
1 12 3 -5.4807 0.0107
1 12 4 4.7302 -0.0850
1 12 5 -1.2201 -0.0557
1 12 6 -2.0976 0.2221
1 12 7 -2.0514 -0.0043
1 12 8 1.1359 0.1371
1 12 9 -5.6804 0.0473
1 12 10 1.5029 -0.0858
1 13 0 -2.7310 -0.0306
1 13 1 -0.6963 0.0081
1 13 2 5.9612 -0.2720
1 13 3 -5.2547 0.0160
1 13 4 2.4584 -0.2709
1 13 5 0.9434 -0.1652
1 13 6 2.1101 -0.2689
1 13 7 -0.2688 0.0663
1 13 8 6.0025 -0.1768
1 13 9 -2.9604 -0.0882
1 14 0 3.0242 0.2110
1 14 1 -1.7479 -0.1556
1 14 2 -0.7731 0.3012
1 14 3 -4.1114 0.0987
1 14 4 3.4794 0.0867
1 14 5 0.8227 0.2147
1 14 6 -3.2071 -0.1097
1 14 7 -4.4026 0.1072
1 14 8 2.9444 -0.0274
1 14 9 -4.5885 -0.0460
1 15 0 -1.9641 0.1564
1 15 1 -0.4522 -0.1961
1 15 2 5.8194 0.2105
1 15 3 -1.9782 -0.0313
1 15 4 -1.7994 0.2539
1 15 5 1.6416 0.0203
1 15 6 -0.1517 0.0869
1 15 7 -0.2894 0.1217
1 15 8 2.0386 0.1303
1 15 9 -2.8699 -0.0608
1 16 0 2.6608 -0.2848
1 16 1 -1.1244 -0.1402
1 16 2 -0.6697 -0.1158
1 16 3 -4.1014 -0.1712
1 16 4 3.7806 -0.1242
1 16 5 5.9884 -0.2712
1 16 6 -2.7224 -0.0769
1 16 7 0.4318 -0.1936
1 16 8 2.1803 0.4200
1 17 0 -1.6865 -0.0656
1 17 1 -0.2702 0.1367
1 17 2 4.6591 -0.2692
1 17 3 -4.6823 0.2835
1 17 4 -3.3481 0.0696
1 17 5 0.7861 -0.0728
1 17 6 -4.5166 -0.0928
1 17 7 -0.5152 -0.0269
1 17 8 -1.4864 0.2217
1 18 0 0.5469 0.1474
1 18 1 2.0067 0.2008
1 18 2 3.0243 0.0541
1 18 3 -2.7708 0.3506
1 18 4 2.8932 0.1277
1 18 5 5.6529 0.2600
1 18 6 -2.5083 -0.2268
1 18 7 1.9840 -0.0878
1 19 0 -3.5285 0.0869
1 19 1 -1.5193 -0.3840
1 19 2 1.1969 -0.1677
1 19 3 -4.2744 -0.1668
1 19 4 0.6534 -0.0489
1 19 5 3.5341 -0.1216
1 19 6 -3.4369 -0.2586
1 20 0 -0.8944 0.0070
1 20 1 2.3382 -0.1700
1 20 2 3.5082 0.0313
1 20 3 -4.3230 -0.3288
1 20 4 -1.4288 0.3307
1 20 5 -0.1421 0.1377
1 21 0 -3.4027 0.0218
1 21 1 -0.2022 0.5519
1 21 2 2.0307 0.4621
1 21 3 -0.8766 0.1205
1 21 4 5.2575 0.4343
1 22 0 -2.1083 -0.9512
1 22 1 0.3151 -0.1721
1 22 2 0.5581 -0.8648
1 22 3 -3.9690 -0.5731
2 0 2 8.0534 -2.6823
2 0 4 -1.5105 -0.8849
2 0 6 11.5438 1.4894
2 0 8 5.5861 2.1291
2 0 10 -1.2616 1.6167
2 1 0 8.1568 0.3545
2 1 2 0.0259 -1.4749
2 1 3 -13.7664 0.6651
2 1 4 -0.0746 -2.0649
2 1 5 0.4433 -0.2166
2 1 6 2.8300 -1.4021
2 1 7 -6.9207 -0.7231
2 1 8 1.2794 -0.4827
2 1 9 -3.0859 -0.5438
2 1 10 -2.1603 0.4319
2 1 11 -0.6574 -0.4823
2 2 2 4.5382 0.8743
2 2 3 -1.2905 0.2024
2 2 4 -1.8996 0.1107
2 2 5 1.7354 0.1292
2 2 6 0.2766 -0.3594
2 2 7 -5.2966 0.1350
2 2 8 3.1448 -0.4146
2 2 9 3.7286 -0.1060
2 2 10 0.8459 -0.1858
2 2 11 3.5024 0.1970
2 3 0 9.3874 -0.2254
2 3 1 4.1879 -0.8665
2 3 2 0.7356 0.8310
2 3 3 -4.3460 -0.4417
2 3 4 -4.3465 0.8607
2 3 5 6.8839 0.1252
2 3 6 3.9615 0.8353
2 3 7 3.2520 0.3687
2 3 8 -3.7061 0.1769
2 3 9 -1.8868 0.6907
2 3 10 -5.5516 -0.1677
2 3 11 -3.4024 -0.0555
2 4 0 13.9071 -0.1691
2 4 1 -8.2319 -0.1027
2 4 2 -3.7940 -0.0339
2 4 3 6.2323 -0.6526
2 4 4 -0.0147 0.0663
2 4 5 2.6776 -0.6807
2 4 6 -10.4787 -0.0298
2 4 7 0.1988 -0.2469
2 4 8 0.1724 -0.0180
2 4 9 6.3942 0.0796
2 4 10 0.9813 0.1394
2 4 11 3.2725 -0.0453
2 5 0 1.3526 -0.2065
2 5 1 -1.6918 0.4228
2 5 2 2.3058 0.0279
2 5 3 0.6417 0.2818
2 5 4 -11.0629 -0.5086
2 5 5 6.9996 -0.0234
2 5 6 2.2984 -0.3208
2 5 7 3.5516 -0.3498
2 5 8 -5.1055 -0.0440
2 5 9 1.3137 -0.2420
2 5 10 -1.8748 0.1535
2 5 11 -3.6041 -0.3861
2 6 0 10.1688 0.1774
2 6 1 -12.9551 0.0290
2 6 2 -6.3517 -0.1884
2 6 3 9.5118 0.7606
2 6 4 1.7411 -0.0796
2 6 5 2.5857 0.6486
2 6 6 -8.4940 0.1141
2 6 7 1.1834 0.3347
2 6 8 1.0570 0.0254
2 6 9 -1.1551 0.0401
2 6 10 0.4573 0.3558
2 6 11 0.1782 -0.6914
2 7 0 7.2533 0.2963
2 7 1 4.6080 -0.2545
2 7 2 6.6430 -0.1746
2 7 3 -1.6474 -0.1698
2 7 4 -7.1523 -0.0369
2 7 5 5.6095 0.0882
2 7 6 0.9168 -0.1316
2 7 7 0.8300 0.1732
2 7 8 1.3639 0.0647
2 7 9 0.6984 0.0084
2 7 10 3.4031 0.2150
2 8 0 -4.0455 0.0614
2 8 1 -12.9739 0.0094
2 8 2 -3.5128 0.1715
2 8 3 -0.4377 -0.4651
2 8 4 2.1221 -0.0314
2 8 5 -1.2847 -0.5711
2 8 6 -6.5453 -0.0229
2 8 7 -0.5180 -0.3260
2 8 8 1.6674 -0.0556
2 8 9 -5.4908 0.0887
2 8 10 0.0402 -0.1269
2 9 0 11.3487 -0.2224
2 9 1 8.6313 0.2750
2 9 2 5.6787 0.1321
2 9 3 -1.5502 0.0918
2 9 4 5.2031 0.5155
2 9 5 2.1485 -0.1014
2 9 6 3.3243 0.2763
2 9 7 2.1804 -0.0979
2 9 8 4.4341 0.0499
2 9 9 -0.0951 -0.0261
2 9 10 2.8039 -0.0188
2 10 0 -7.9928 -0.3213
2 10 1 -3.0078 0.1654
2 10 2 -5.0270 -0.1414
2 10 3 -6.7424 0.1504
2 10 4 2.4414 0.0707
2 10 5 -8.6377 0.1996
2 10 6 -3.5168 0.0081
2 10 7 -4.8748 0.1476
2 10 8 0.7951 0.2148
2 10 9 -6.3303 0.0247
2 10 10 -1.7846 -0.5621
2 11 0 6.5170 -0.0106
2 11 1 7.0551 -0.1442
2 11 2 0.8674 -0.0571
2 11 3 1.2170 -0.1405
2 11 4 10.0815 -0.5987
2 11 5 -1.6328 0.0563
2 11 6 7.1961 -0.3250
2 11 7 2.3310 0.0077
2 11 8 8.4289 -0.1298
2 11 9 -0.9303 0.5535
2 12 0 -3.0725 0.3216
2 12 1 0.2660 -0.2107
2 12 2 -2.2629 0.2458
2 12 3 -6.0461 0.1514
2 12 4 1.1813 0.0560
2 12 5 -7.2412 0.0858
2 12 6 -0.7469 -0.2398
2 12 7 -5.8293 0.0855
2 12 8 0.0763 -0.1362
2 12 9 -6.2574 0.0032
2 13 0 2.5661 0.0112
2 13 1 1.4969 0.0218
2 13 2 2.5491 0.2983
2 13 3 -1.3583 0.0078
2 13 4 5.4334 0.2041
2 13 5 -0.5288 0.1741
2 13 6 0.1208 0.2675
2 13 7 1.6521 -0.1969
2 13 8 5.8738 0.0563
2 13 9 -1.5187 0.5820
2 14 0 -2.3458 -0.2628
2 14 1 -1.6295 0.0761
2 14 2 4.2079 -0.3334
2 14 3 -4.1079 -0.2156
2 14 4 -1.7022 -0.0902
2 14 5 2.1078 -0.2785
2 14 6 0.7363 0.1517
2 14 7 1.5247 -0.1404
2 14 8 -0.4607 0.2192
2 15 0 -1.3632 -0.0959
2 15 1 -0.7771 0.2479
2 15 2 3.5093 -0.1299
2 15 3 -1.6564 0.0396
2 15 4 -0.5145 -0.0898
2 15 5 1.5168 0.0164
2 15 6 -7.1901 0.0726
2 15 7 -1.1880 -0.4849
2 15 8 0.7441 -0.1292
2 16 0 -1.0477 0.2520
2 16 1 -2.5034 0.1771
2 16 2 4.0935 0.1702
2 16 3 -1.4578 0.1567
2 16 4 -3.5109 0.0566
2 16 5 6.2075 0.2031
2 16 6 3.3670 0.2272
2 16 7 2.9758 -0.0509
2 17 0 0.1050 0.1464
2 17 1 -1.6224 -0.3303
2 17 2 4.0537 0.0054
2 17 3 -1.8183 -0.3366
2 17 4 -3.9158 -0.1845
2 17 5 -1.5269 0.1885
2 17 6 -4.4458 0.1310
2 17 7 -2.3219 -0.5896
2 18 0 1.0164 -0.0163
2 18 1 -4.4629 -0.0279
2 18 2 3.8499 0.2175
2 18 3 1.6581 -0.2300
2 18 4 4.4325 -0.2390
2 18 5 4.0374 0.1800
2 18 6 3.0673 0.3598
2 19 0 0.7776 0.0147
2 19 1 -1.0504 0.3891
2 19 2 0.2259 0.1349
2 19 3 -8.0239 0.0852
2 19 4 -5.0640 -0.0198
2 19 5 -5.4839 0.2994
2 20 0 -0.5890 -0.8142
2 20 1 0.7947 0.2291
2 20 2 3.7288 -0.4269
2 20 3 5.5734 -0.3235
2 20 4 8.8783 -0.2704
2 21 0 -1.4280 0.0016
2 21 1 0.1802 0.8535
2 21 2 -4.8595 -0.0957
2 21 3 -5.7443 0.2465
3 0 0 9.4772 3.9531
3 0 2 -11.8327 2.1560
3 0 6 -6.8695 -1.2375
3 0 8 0.8663 -1.7338
3 0 10 -0.7280 -1.1558
3 1 0 -2.5773 -0.3077
3 1 1 -3.6375 -1.4206
3 1 2 -2.7622 1.2356
3 1 3 12.2493 -0.6633
3 1 4 0.7796 1.7140
3 1 5 -1.3568 0.2982
3 1 6 -5.6188 1.1912
3 1 7 3.9736 0.5617
3 1 8 0.7289 0.4055
3 1 9 0.8638 0.4651
3 1 10 3.4098 -0.5988
3 2 0 -6.3638 -0.1796
3 2 1 7.9797 -0.2137
3 2 2 -6.7757 -0.7704
3 2 3 2.6907 -0.1717
3 2 4 1.5632 -0.0679
3 2 5 -0.3776 -0.1232
3 2 6 0.2314 0.3287
3 2 7 8.4518 -0.1234
3 2 8 -4.9334 0.0890
3 2 9 -7.7613 0.0512
3 2 10 0.1514 0.4929
3 3 0 -7.2822 0.1692
3 3 1 5.4144 0.7991
3 3 2 -11.2919 -0.7087
3 3 3 4.8005 0.2839
3 3 4 4.2994 -0.7061
3 3 5 -7.8837 -0.0109
3 3 6 -6.4412 -0.6542
3 3 7 3.4537 -0.3578
3 3 8 1.2149 -0.1757
3 3 9 2.7356 -0.5385
3 3 10 0.0410 0.1904
3 4 0 -12.0398 0.0776
3 4 1 19.2123 0.0885
3 4 2 -0.8120 0.0433
3 4 3 -1.3262 0.5561
3 4 4 -1.4809 -0.0773
3 4 5 -0.8867 0.6094
3 4 6 7.0660 0.1256
3 4 7 4.1849 0.1640
3 4 8 -5.6682 -0.0858
3 4 9 0.9323 -0.0642
3 4 10 4.0236 0.2830
3 5 0 -3.9312 0.1815
3 5 1 -0.0849 -0.3519
3 5 2 -9.4829 -0.0185
3 5 3 4.6973 -0.2581
3 5 4 6.0051 0.3997
3 5 5 -3.5255 0.0684
3 5 6 -4.2457 0.2191
3 5 7 -1.2610 0.1841
3 5 8 -2.3373 -0.0312
3 5 9 -1.7572 0.1643
3 5 10 -9.7042 0.2830
3 6 0 4.8001 -0.1111
3 6 1 11.4157 -0.1135
3 6 2 1.4409 0.1752
3 6 3 -8.3581 -0.6156
3 6 4 -3.3640 0.0128
3 6 5 4.6612 -0.4669
3 6 6 4.7006 -0.0960
3 6 7 -0.2555 -0.3129
3 6 8 0.5268 -0.0044
3 6 9 7.2202 -0.0798
3 6 10 2.2301 -0.3205
3 7 0 1.1169 -0.1617
3 7 1 -7.1807 0.2295
3 7 2 1.5697 0.1270
3 7 3 -1.2647 0.1365
3 7 4 2.9335 0.0845
3 7 5 -0.2097 -0.0002
3 7 6 -3.6948 0.0977
3 7 7 -3.5210 -0.1647
3 7 8 4.8747 -0.0382
3 7 9 0.3691 0.1478
3 8 0 5.0691 -0.0383
3 8 1 -0.8872 -0.0169
3 8 2 5.0336 -0.1480
3 8 3 -6.0109 0.3898
3 8 4 4.1280 0.0246
3 8 5 5.0667 0.4014
3 8 6 1.1784 -0.0150
3 8 7 -9.9924 0.2068
3 8 8 0.1180 0.1147
3 8 9 -4.9355 -0.1265
3 9 0 -1.4367 0.2182
3 9 1 -4.0760 -0.1841
3 9 2 3.6772 -0.2571
3 9 3 -8.2021 -0.1166
3 9 4 0.4689 -0.2988
3 9 5 -0.1598 0.0513
3 9 6 0.4741 -0.2130
3 9 7 -2.2455 -0.0664
3 9 8 18.4519 -0.0467
3 9 9 2.1349 0.3921
3 10 0 -4.9764 0.3114
3 10 1 -2.9310 -0.0695
3 10 2 5.4845 0.0866
3 10 3 -0.8321 -0.0869
3 10 4 3.6809 0.0236
3 10 5 2.8727 -0.1808
3 10 6 1.0272 0.0556
3 10 7 -12.2478 -0.0727
3 10 8 0.5034 -0.1328
3 10 9 -10.2978 -0.0061
3 11 0 -3.7987 0.0129
3 11 1 1.3583 0.1950
3 11 2 1.8374 0.0089
3 11 3 -2.6951 0.0408
3 11 4 -0.8342 0.4589
3 11 5 -0.6594 0.0166
3 11 6 -0.8229 0.1957
3 11 7 -3.3798 -0.1256
3 11 8 12.7282 0.0162
3 12 0 -7.1027 -0.3361
3 12 1 -0.5308 0.0421
3 12 2 -0.9907 -0.2242
3 12 3 0.8084 -0.0920
3 12 4 -1.2318 -0.0529
3 12 5 2.4265 -0.0429
3 12 6 4.1022 0.0452
3 12 7 -5.2942 0.0640
3 12 8 2.5556 -0.0975
3 13 0 -2.5667 -0.0502
3 13 1 3.0109 0.1144
3 13 2 0.1514 -0.0734
3 13 3 4.8828 -0.1147
3 13 4 -1.7392 -0.2093
3 13 5 -2.2103 0.0830
3 13 6 2.3900 -0.1413
3 13 7 -3.4048 0.2307
3 13 8 3.0151 -0.2343
3 14 0 -0.6435 0.1498
3 14 1 0.3748 -0.2198
3 14 2 -3.7986 0.3330
3 14 3 1.2668 0.2181
3 14 4 -1.6978 0.0157
3 14 5 -2.2437 0.0360
3 14 6 1.3962 -0.0447
3 14 7 -5.2467 0.1358
3 15 0 0.2963 -0.0253
3 15 1 -1.3925 -0.1867
3 15 2 0.0345 0.1802
3 15 3 2.2915 -0.1015
3 15 4 1.1157 -0.0850
3 15 5 0.3233 -0.1322
3 15 6 6.8398 0.3404
3 15 7 1.5060 0.1211
3 16 0 2.6124 -0.0665
3 16 1 0.8203 -0.0944
3 16 2 1.7945 0.0315
3 16 3 -2.1431 0.0442
3 16 4 1.0087 -0.1960
3 16 5 -5.1450 -0.1277
3 16 6 -4.2020 0.5214
3 17 0 -1.4765 -0.1988
3 17 1 -3.3879 0.2238
3 17 2 0.0277 0.0890
3 17 3 -2.7157 0.3402
3 17 4 5.8451 -0.3104
3 17 5 0.9478 -0.2490
3 18 0 -0.6060 -0.1963
3 18 1 4.2011 0.1716
3 18 2 2.7638 -0.2047
3 18 3 -4.9449 -0.0692
3 18 4 1.7810 -0.2043
3 19 0 -3.3148 -0.0954
3 19 1 -0.8370 0.2826
3 19 2 -0.9223 0.2515
3 19 3 -0.4876 0.2228
3 20 0 -0.7796 -0.2645
3 20 1 3.2565 0.1327
4 0 0 -20.4541 -3.1745
4 0 2 -6.1665 -1.6762
4 0 4 1.9874 -0.6875
4 0 6 6.7018 0.8837
4 0 8 15.7897 1.1974
4 1 0 -0.0751 0.2132
4 1 1 17.7491 1.1523
4 1 2 -1.3563 -0.9741
4 1 3 -3.0622 0.5028
4 1 4 -0.8812 -1.2644
4 1 5 -1.7818 -0.3117
4 1 6 1.5723 -0.9736
4 1 7 -11.5826 -0.2675
4 1 8 -1.1720 -0.1827
4 2 0 -5.5144 0.0412
4 2 1 0.8812 0.1873
4 2 2 -2.5253 0.7861
4 2 3 2.9044 0.1946
4 2 4 2.7435 0.0202
4 2 5 -0.0801 0.0451
4 2 6 3.2602 -0.2285
4 2 7 0.8926 0.2065
4 2 8 13.9523 0.0411
4 3 0 5.5933 -0.1551
4 3 1 0.6767 -0.5917
4 3 2 -0.1527 0.5258
4 3 3 -6.0560 -0.2684
4 3 4 -5.1307 0.5131
4 3 5 -0.4602 -0.1075
4 3 6 -0.8587 0.3996
4 3 7 -4.5839 0.4490
4 3 8 -2.2083 0.1618
4 3 9 -8.2854 -0.2649
4 4 0 9.0470 -0.1078
4 4 1 -8.5239 -0.0511
4 4 2 5.4162 0.0265
4 4 3 7.6233 -0.4617
4 4 4 5.9621 -0.0140
4 4 5 1.2563 -0.3996
4 4 6 -1.2682 -0.1153
4 4 7 3.2181 -0.1092
4 4 8 1.3486 0.2451
4 5 0 8.6231 0.0004
4 5 1 -7.6934 0.3714
4 5 2 2.6717 0.0454
4 5 3 -7.3083 0.2301
4 5 4 -7.7064 -0.3454
4 5 5 -3.0309 0.0186
4 5 6 1.9840 -0.0722
4 5 7 4.9927 -0.0902
4 5 8 0.3111 0.0484
4 6 0 3.9939 0.0422
4 6 1 -11.9011 0.0521
4 6 2 6.5926 -0.1905
4 6 3 8.9833 0.4116
4 6 4 1.8806 -0.0656
4 6 5 -2.5484 0.3394
4 6 6 2.2162 0.0209
4 6 7 -2.8597 0.1633
4 6 8 -5.9528 0.1841
4 7 0 4.1732 0.1965
4 7 1 -4.0627 -0.1665
4 7 2 4.6897 -0.1138
4 7 3 0.4482 -0.1587
4 7 4 -8.5164 -0.0918
4 7 5 -2.8221 0.1073
4 7 6 9.2869 0.0396
4 7 7 -1.6966 -0.1355
4 7 8 -0.0042 -0.0050
4 8 0 0.0234 0.1286
4 8 1 -8.1473 0.0406
4 8 2 3.1576 0.1073
4 8 3 5.3188 -0.2126
4 8 4 -6.0388 0.0726
4 8 5 -0.7685 -0.3398
4 8 6 9.3611 0.0951
4 8 7 -5.5606 -0.0970
4 8 8 4.0495 0.1126
4 9 0 0.5867 -0.2667
4 9 1 -2.0040 0.0901
4 9 2 4.3495 0.1508
4 9 3 1.9751 -0.0099
4 9 4 -7.5458 0.1597
4 9 5 -0.4626 0.0322
4 9 6 8.1979 0.1550
4 9 7 -12.0269 -0.3795
4 10 0 1.2164 -0.1861
4 10 1 0.0231 -0.0780
4 10 2 3.4809 -0.0939
4 10 3 0.4871 0.2113
4 10 4 -3.2832 0.0070
4 10 5 -0.7083 0.0176
4 10 6 8.1037 0.0038
4 10 7 -5.2968 0.1733
4 11 0 -1.8145 -0.0184
4 11 1 -1.6096 -0.0628
4 11 2 -1.4663 0.0874
4 11 3 -3.0670 -0.0071
4 11 4 1.1558 -0.2744
4 11 5 -0.0765 0.0650
4 11 6 7.0370 -0.1339
4 11 7 -7.3132 -0.1133
4 12 0 0.1149 0.0385
4 12 1 6.4756 -0.2919
4 12 2 2.8118 0.1344
4 12 3 -2.1956 0.2009
4 12 4 2.3856 -0.0038
4 12 5 -5.0977 -0.3345
4 12 6 1.9116 -0.0365
4 13 0 -0.8430 -0.0114
4 13 1 -0.3761 -0.0512
4 13 2 -5.4510 0.0725
4 13 3 -3.6221 0.2003
4 13 4 5.9077 0.1840
4 13 5 -2.2332 -0.2084
4 13 6 2.6013 0.3652
4 14 0 -3.9894 -0.1325
4 14 1 6.5455 0.0306
4 14 2 1.5789 -0.1043
4 14 3 -0.9430 0.2279
4 14 4 4.0315 -0.1419
4 14 5 -2.3590 -0.4013
4 15 0 -1.0808 -0.1572
4 15 1 0.2153 -0.2093
4 15 2 -4.6833 -0.0564
4 15 3 -1.4085 0.2155
4 15 4 2.0659 -0.3362
4 16 0 -4.8761 0.3339
4 16 1 4.0016 -0.2703
4 16 2 0.5493 0.3216
4 16 3 0.3890 0.2271
4 17 0 -1.2857 0.0397
4 17 1 0.3746 -0.3932
4 17 2 -0.3637 0.5100
5 0 0 -2.8437 2.4311
5 0 2 1.2659 1.2580
5 0 4 -0.0551 0.5501
5 0 6 -2.9463 -0.5075
5 1 0 1.3832 -0.1611
5 1 1 -2.1164 -0.9056
5 1 2 -1.6816 0.6876
5 1 3 -1.1802 -0.5135
5 1 4 -0.3344 0.8435
5 1 5 3.8154 0.2071
5 1 6 -3.1926 0.9111
5 2 0 -3.4076 0.0252
5 2 1 0.3584 -0.1752
5 2 2 1.7117 -0.5648
5 2 3 0.1123 -0.0549
5 2 4 -0.3091 0.1575
5 2 5 2.5648 -0.1764
5 2 6 -3.3687 0.1764
5 3 0 0.9048 0.1675
5 3 1 -1.7809 0.4332
5 3 2 -0.6663 -0.4204
5 3 3 -0.6828 0.1455
5 3 4 2.4958 -0.3058
5 3 5 2.7978 0.1280
5 3 6 -2.2463 -0.1835
5 4 0 -1.8206 0.1218
5 4 1 -0.4208 -0.0087
5 4 2 2.1292 -0.1016
5 4 3 -3.7960 0.3051
5 4 4 -0.3156 0.0203
5 4 5 -0.4257 0.3230
5 4 6 -2.1734 -0.0431
5 5 0 0.4274 0.0671
5 5 1 -1.8495 -0.1974
5 5 2 1.7498 0.0165
5 5 3 -0.9682 -0.1456
5 5 4 3.3789 0.2340
5 5 5 1.5590 0.0482
5 5 6 0.5406 -0.3833
5 6 0 0.6411 -0.0670
5 6 1 -1.9993 -0.0320
5 6 2 1.4287 0.0855
5 6 3 -1.7473 -0.3593
5 6 4 0.6088 0.0602
5 6 5 0.3263 0.1845
5 6 6 -1.3991 -0.0845
5 7 0 4.2100 -0.1754
5 7 1 -0.3208 0.2246
5 7 2 0.0021 0.0409
5 7 3 0.2907 0.0660
5 7 4 -0.3497 -0.0346
5 7 5 0.6347 -0.0283
5 8 0 -1.4505 -0.1008
5 8 1 -5.3271 0.0835
5 8 2 -2.0874 -0.0388
5 8 3 2.3289 0.0852
5 8 4 -0.3010 -0.1359
5 8 5 1.2914 0.6195
5 9 0 9.0663 0.1777
5 9 1 2.9874 -0.1270
5 9 2 1.8164 -0.1312
5 9 3 3.3171 -0.0615
5 9 4 -2.0061 0.0102
5 9 5 -0.4332 0.2340
5 10 0 -4.7343 0.2068
5 10 1 -9.5929 0.0061
5 10 2 -2.6020 0.2315
5 10 3 0.6919 -0.4737
5 10 4 -0.9207 -0.0973
5 11 0 7.7832 0.0633
5 11 1 3.1222 0.0061
5 11 2 5.2797 0.1096
5 11 3 0.4598 -0.1592
5 12 0 -4.4432 -0.3591
5 12 1 -5.8580 0.0612
5 12 2 0.6033 -0.0517
5 12 3 -2.2172 -0.5047
5 13 0 0.4744 0.0224
5 13 1 2.3194 0.3051
6 0 0 -2.1566 -1.7096
6 0 2 1.9137 -0.8056
6 1 0 3.8499 0.2166
6 1 1 1.4027 0.9912
6 1 2 1.8943 -0.6949
6 2 0 0.1260 -0.1541
6 2 1 -5.1738 0.2878
6 2 2 4.2594 0.1094
6 3 0 6.9690 0.0337
6 3 1 -3.1697 -0.0440
6 3 2 1.8008 -0.0951
6 4 0 2.2174 0.3145
6 4 1 -3.1517 0.1436
6 5 0 3.7430 -0.0670
6 5 1 -2.6757 -0.0592
0 0 0 0.0 0.0
;
_shelx_fab_checksum                65347
_olex2_submission_special_instructions  'No special instructions were received'
_oxdiff_exptl_absorpt_empirical_details
;
Empirical correction (ABSPACK) includes:
- Absorption correction using spherical harmonics
- Frame scaling
;
_oxdiff_exptl_absorpt_empirical_full_max  2.223
_oxdiff_exptl_absorpt_empirical_full_min  0.500
_vrf_PLAT084_lcam16
;
PROBLEM: High wR2 Value (i.e. > 0.25) ...................       0.43 Report
RESPONSE: 
Due to the poor resolution of the data adquired, the model was based on 
ill shaped electrondensity map. As consequence the wR2 and R1 values
are larger than normal values
;
_vrf_PLAT201_lcam16
;
PROBLEM: Isotropic non-H Atoms in Main Residue(s) .......          8 Report
RESPONSE: 
In order to maximize the data/parameter ratio, the disordered atoms were refined
isotrophically
;
_vrf_PLAT341_lcam16
;
PROBLEM: Low Bond Precision on  C-C Bonds ...............    0.02706 Ang.  
RESPONSE: 
It is caused by the low resolution data. 
;
# start Validation Reply Form
_vrf_THETM01_lcam16
;
PROBLEM: The value of sine(theta_max)/wavelength is less than 0.550
RESPONSE: Crystals diffracted to 1.1 A of resolution, so the data had
to be trimmed accordigly
;
